# Supplementary material for: An acquired scaffolding function of the DNAJ-PKAc fusion contributes to oncogenic signaling in fibrolamellar carcinoma
Source: eLife. 2019 May 7;8:e44187. doi: 10.7554/eLife.44187 (PMC6533061; doi:10.7554/eLife.44187)
Supplement: Supplementary file 1. [file elife-44187-supp1.xlsx]

## Sheet: AML12 WT single
Raw Data - single compound; AML12 WT
Compound	Well_Coordinate	Concentration	Lum	normLum
Alpelisib	C24	4.12e-08	136236	1.11612
Alpelisib	C23	1.23e-07	139095	1.13954
Alpelisib	C22	3.7e-07	137563	1.12699
Alpelisib	C21	1.11e-06	101359	0.830389
Alpelisib	C20	3.33e-06	119854	0.981911
Alpelisib	C19	1e-05	112005	0.917607
Axitinib	G06	4.12e-08	134941	1.10551
Axitinib	G05	1.23e-07	136638	1.11941
Axitinib	G04	3.7e-07	145294	1.19033
Axitinib	G03	1.11e-06	134483	1.10176
Axitinib	G02	3.33e-06	127946	1.04821
Axitinib	G01	1e-05	121302	0.993774
AZD1775	N24	4.12e-08	131042	1.07357
AZD1775	N23	1.23e-07	109313	0.895553
AZD1775	N22	3.7e-07	131034	1.0735
AZD1775	N21	1.11e-06	90538	0.741738
AZD1775	N20	3.33e-06	54940	0.450099
AZD1775	N19	1e-05	71687	0.5873
AZD4547	D12	4.12e-08	150596	1.23377
AZD4547	D11	1.23e-07	122084	1.00018
AZD4547	D10	3.7e-07	120573	0.987801
AZD4547	D09	1.11e-06	130030	1.06528
AZD4547	D08	3.33e-06	127553	1.04499
AZD4547	D07	1e-05	123497	1.01176
AZD6482	D24	4.12e-08	143632	1.17671
AZD6482	D23	1.23e-07	136329	1.11688
AZD6482	D22	3.7e-07	133466	1.09343
AZD6482	D21	1.11e-06	139842	1.14566
AZD6482	D20	3.33e-06	131608	1.07821
AZD6482	D19	1e-05	110914	0.908669
Belinostat	I12	4.12e-08	120360	0.986056
Belinostat	I11	1.23e-07	132940	1.08912
Belinostat	I10	3.7e-07	133699	1.09534
Belinostat	I09	1.11e-06	119211	0.976643
Belinostat	I08	3.33e-06	88629	0.726098
Belinostat	I07	1e-05	16369	0.134104
BMS-754807	K12	4.12e-08	129503	1.06096
BMS-754807	K11	1.23e-07	120933	0.990751
BMS-754807	K10	3.7e-07	113133	0.926849
BMS-754807	K09	1.11e-06	63290	0.518507
BMS-754807	K08	3.33e-06	34137	0.279669
BMS-754807	K07	1e-05	24718	0.202504
Buparlisib	L18	4.12e-08	116065	0.950869
Buparlisib	L17	1.23e-07	125178	1.02553
Buparlisib	L16	3.7e-07	123626	1.01281
Buparlisib	L15	1.11e-06	110389	0.904368
Buparlisib	L14	3.33e-06	42268	0.346283
Buparlisib	L13	1e-05	17094	0.140044
Cabozantinib	G18	4.12e-08	118921	0.974267
Cabozantinib	G17	1.23e-07	121570	0.995969
Cabozantinib	G16	3.7e-07	120458	0.986859
Cabozantinib	G15	1.11e-06	122480	1.00342
Cabozantinib	G14	3.33e-06	123807	1.0143
Cabozantinib	G13	1e-05	126798	1.0388
Cediranib	L24	4.12e-08	120285	0.985442
Cediranib	L23	1.23e-07	108061	0.885296
Cediranib	L22	3.7e-07	107183	0.878103
Cediranib	L21	1.11e-06	105727	0.866175
Cediranib	L20	3.33e-06	107413	0.879987
Cediranib	L19	1e-05	110787	0.907629
Celecoxib	L06	4.12e-08	123412	1.01106
Celecoxib	L05	1.23e-07	106751	0.874564
Celecoxib	L04	3.7e-07	113542	0.930199
Celecoxib	L03	1.11e-06	125664	1.02951
Celecoxib	L02	3.33e-06	144381	1.18285
Celecoxib	L01	1e-05	132270	1.08363
Cobimetinib	E18	4.12e-08	147192	1.20588
Cobimetinib	E17	1.23e-07	87334	0.715489
Cobimetinib	E16	3.7e-07	48564	0.397863
Cobimetinib	E15	1.11e-06	30797	0.252306
Cobimetinib	E14	3.33e-06	24861	0.203675
Cobimetinib	E13	1e-05	9833	0.0805574
Dabrafenib	I06	4.12e-08	139598	1.14366
Dabrafenib	I05	1.23e-07	157673	1.29175
Dabrafenib	I04	3.7e-07	158420	1.29787
Dabrafenib	I03	1.11e-06	158295	1.29684
Dabrafenib	I02	3.33e-06	141659	1.16055
Dabrafenib	I01	1e-05	116866	0.957431
Dactolisib	M06	4.12e-08	121162	0.992627
Dactolisib	M05	1.23e-07	142132	1.16442
Dactolisib	M04	3.7e-07	152373	1.24832
Dactolisib	M03	1.11e-06	150980	1.23691
Dactolisib	M02	3.33e-06	134332	1.10052
Dactolisib	M01	1e-05	73079	0.598704
Dasatinib	H06	4.12e-08	117835	0.96537
Dasatinib	H05	1.23e-07	122806	1.0061
Dasatinib	H04	3.7e-07	87090	0.71349
Dasatinib	H03	1.11e-06	38483	0.315274
Dasatinib	H02	3.33e-06	26102	0.213842
Dasatinib	H01	1e-05	22408	0.183579
Dovitinib	F12	4.12e-08	135673	1.11151
Dovitinib	F11	1.23e-07	126731	1.03825
Dovitinib	F10	3.7e-07	126335	1.03501
Dovitinib	F09	1.11e-06	123148	1.0089
Dovitinib	F08	3.33e-06	137195	1.12398
Dovitinib	F07	1e-05	126770	1.03857
Enzalutamide	D06	4.12e-08	118328	0.969409
Enzalutamide	D05	1.23e-07	125976	1.03207
Enzalutamide	D04	3.7e-07	120130	0.984172
Enzalutamide	D03	1.11e-06	126039	1.03258
Enzalutamide	D02	3.33e-06	136986	1.12227
Enzalutamide	D01	1e-05	136799	1.12073
Erlotinib	N06	4.12e-08	124059	1.01636
Erlotinib	N05	1.23e-07	129048	1.05723
Erlotinib	N04	3.7e-07	124399	1.01915
Erlotinib	N03	1.11e-06	120209	0.984819
Erlotinib	N02	3.33e-06	94752	0.776261
Erlotinib	N01	1e-05	95783	0.784708
Everolimus	H18	4.12e-08	129535	1.06122
Everolimus	H17	1.23e-07	105374	0.863283
Everolimus	H16	3.7e-07	91354	0.748423
Everolimus	H15	1.11e-06	77441	0.63444
Everolimus	H14	3.33e-06	64491	0.528346
Everolimus	H13	1e-05	69406	0.568613
Fulvestrant	C12	4.12e-08	137968	1.13031
Fulvestrant	C11	1.23e-07	137069	1.12295
Fulvestrant	C10	3.7e-07	138670	1.13606
Fulvestrant	C09	1.11e-06	156692	1.28371
Fulvestrant	C08	3.33e-06	147947	1.21206
Fulvestrant	C07	1e-05	12630	0.103472
Ibrutinib	K06	4.12e-08	134651	1.10314
Ibrutinib	K05	1.23e-07	142499	1.16743
Ibrutinib	K04	3.7e-07	162252	1.32926
Ibrutinib	K03	1.11e-06	164765	1.34985
Ibrutinib	K02	3.33e-06	180569	1.47932
Ibrutinib	K01	1e-05	127697	1.04617
Idelalisib	E24	4.12e-08	147328	1.20699
Idelalisib	E23	1.23e-07	134692	1.10347
Idelalisib	E22	3.7e-07	128468	1.05248
Idelalisib	E21	1.11e-06	121398	0.99456
Idelalisib	E20	3.33e-06	129261	1.05898
Idelalisib	E19	1e-05	118748	0.97285
Imatinib	K24	4.12e-08	120294	0.985516
Imatinib	K23	1.23e-07	101707	0.83324
Imatinib	K22	3.7e-07	96900	0.793859
Imatinib	K21	1.11e-06	92046	0.754092
Imatinib	K20	3.33e-06	91644	0.750799
Imatinib	K19	1e-05	87065	0.713285
Lapatinib	L12	4.12e-08	102172	0.83705
Lapatinib	L11	1.23e-07	108760	0.891023
Lapatinib	L10	3.7e-07	107707	0.882396
Lapatinib	L09	1.11e-06	116777	0.956702
Lapatinib	L08	3.33e-06	119733	0.98092
Lapatinib	L07	1e-05	118177	0.968172
Lucitanib	E12	4.12e-08	138335	1.13332
Lucitanib	E11	1.23e-07	122311	1.00204
Lucitanib	E10	3.7e-07	135570	1.11067
Lucitanib	E09	1.11e-06	135094	1.10677
Lucitanib	E08	3.33e-06	126637	1.03748
Lucitanib	E07	1e-05	137698	1.1281
Megestrol	H24	4.12e-08	116174	0.951762
Megestrol	H23	1.23e-07	133289	1.09198
Megestrol	H22	3.7e-07	114971	0.941907
Megestrol	H21	1.11e-06	111146	0.91057
Megestrol	H20	3.33e-06	116953	0.958144
Megestrol	H19	1e-05	104582	0.856794
MK2206	K18	4.12e-08	122962	1.00737
MK2206	K17	1.23e-07	124251	1.01793
MK2206	K16	3.7e-07	123716	1.01355
MK2206	K15	1.11e-06	106217	0.870189
MK2206	K14	3.33e-06	121828	0.998083
MK2206	K13	1e-05	122124	1.00051
Navitoclax	F06	4.12e-08	114984	0.942013
Navitoclax	F05	1.23e-07	130707	1.07082
Navitoclax	F04	3.7e-07	136716	1.12005
Navitoclax	F03	1.11e-06	126585	1.03705
Navitoclax	F02	3.33e-06	120967	0.991029
Navitoclax	F01	1e-05	79042	0.647556
Neratinib	B12	4.12e-08	126577	1.03699
Neratinib	B11	1.23e-07	119442	0.978535
Neratinib	B10	3.7e-07	129396	1.06008
Neratinib	B09	1.11e-06	126045	1.03263
Neratinib	B08	3.33e-06	130870	1.07216
Neratinib	B07	1e-05	79641	0.652464
NVP-BGT226	B24	4.12e-08	120700	0.988842
NVP-BGT226	B23	1.23e-07	132058	1.08189
NVP-BGT226	B22	3.7e-07	124331	1.01859
NVP-BGT226	B21	1.11e-06	35293	0.28914
NVP-BGT226	B20	3.33e-06	19389	0.158846
NVP-BGT226	B19	1e-05	1513	0.0123953
Olaparib	M18	4.12e-08	119725	0.980854
Olaparib	M17	1.23e-07	118370	0.969753
Olaparib	M16	3.7e-07	115237	0.944086
Olaparib	M15	1.11e-06	117542	0.96297
Olaparib	M14	3.33e-06	113750	0.931903
Olaparib	M13	1e-05	122543	1.00394
Osimertinib	E06	4.12e-08	142355	1.16625
Osimertinib	E05	1.23e-07	147686	1.20993
Osimertinib	E04	3.7e-07	143293	1.17394
Osimertinib	E03	1.11e-06	136049	1.11459
Osimertinib	E02	3.33e-06	75429	0.617956
Osimertinib	E01	1e-05	32401	0.265447
Palbociclib	N12	4.12e-08	104434	0.855582
Palbociclib	N11	1.23e-07	118720	0.97262
Palbociclib	N10	3.7e-07	123589	1.01251
Palbociclib	N09	1.11e-06	140686	1.15258
Palbociclib	N08	3.33e-06	134328	1.10049
Palbociclib	N07	1e-05	124599	1.02078
Pazopanib	O12	4.12e-08	124491	1.0199
Pazopanib	O11	1.23e-07	110654	0.906539
Pazopanib	O10	3.7e-07	136737	1.12023
Pazopanib	O09	1.11e-06	140372	1.15001
Pazopanib	O08	3.33e-06	127580	1.04521
Pazopanib	O07	1e-05	138108	1.13146
Ponatinib	B18	4.12e-08	18836	0.154315
Ponatinib	B17	1.23e-07	72481	0.593805
Ponatinib	B16	3.7e-07	124423	1.01934
Ponatinib	B15	1.11e-06	131388	1.0764
Ponatinib	B14	3.33e-06	122895	1.00682
Ponatinib	B13	1e-05	135963	1.11388
Poziotinib	O24	4.12e-08	114166	0.935312
Poziotinib	O23	1.23e-07	85666	0.701824
Poziotinib	O22	3.7e-07	76447	0.626296
Poziotinib	O21	1.11e-06	77687	0.636455
Poziotinib	O20	3.33e-06	67639	0.554136
Poziotinib	O19	1e-05	66559	0.545288
Quizartinib	G12	4.12e-08	119999	0.983099
Quizartinib	G11	1.23e-07	125560	1.02866
Quizartinib	G10	3.7e-07	122593	1.00435
Quizartinib	G09	1.11e-06	144076	1.18035
Quizartinib	G08	3.33e-06	133090	1.09035
Quizartinib	G07	1e-05	140422	1.15042
Rigosertib	G24	4.12e-08	71615	0.58671
Rigosertib	G23	1.23e-07	49644	0.406711
Rigosertib	G22	3.7e-07	30958	0.253625
Rigosertib	G21	1.11e-06	12873	0.105463
Rigosertib	G20	3.33e-06	7901	0.0647294
Rigosertib	G19	1e-05	2992	0.0245121
Rucaparib	N18	4.12e-08	124233	1.01779
Rucaparib	N17	1.23e-07	124026	1.01609
Rucaparib	N16	3.7e-07	121440	0.994904
Rucaparib	N15	1.11e-06	113811	0.932403
Rucaparib	N14	3.33e-06	112617	0.922621
Rucaparib	N13	1e-05	111706	0.915158
Ruxolitinib	M12	4.12e-08	120727	0.989063
Ruxolitinib	M11	1.23e-07	120078	0.983746
Ruxolitinib	M10	3.7e-07	118831	0.97353
Ruxolitinib	M09	1.11e-06	113231	0.927652
Ruxolitinib	M08	3.33e-06	124910	1.02333
Ruxolitinib	M07	1e-05	114918	0.941472
Sorafenib	C18	4.12e-08	131903	1.08062
Sorafenib	C17	1.23e-07	126043	1.03261
Sorafenib	C16	3.7e-07	134471	1.10166
Sorafenib	C15	1.11e-06	153435	1.25703
Sorafenib	C14	3.33e-06	139846	1.1457
Sorafenib	C13	1e-05	133892	1.09692
Sunitinib	I24	4.12e-08	122822	1.00623
Sunitinib	I23	1.23e-07	104572	0.856712
Sunitinib	I22	3.7e-07	106567	0.873056
Sunitinib	I21	1.11e-06	108253	0.886869
Sunitinib	I20	3.33e-06	98577	0.807598
Sunitinib	I19	1e-05	108511	0.888983
Tamoxifen	I18	4.12e-08	108866	0.891891
Tamoxifen	I17	1.23e-07	115046	0.942521
Tamoxifen	I16	3.7e-07	122300	1.00195
Tamoxifen	I15	1.11e-06	112780	0.923957
Tamoxifen	I14	3.33e-06	102710	0.841458
Tamoxifen	I13	1e-05	109582	0.897757
Taselisib	F24	4.12e-08	138185	1.13209
Taselisib	F23	1.23e-07	98645	0.808155
Taselisib	F22	3.7e-07	59986	0.491439
Taselisib	F21	1.11e-06	54149	0.443619
Taselisib	F20	3.33e-06	39386	0.322672
Taselisib	F19	1e-05	37068	0.303682
Teniposide	D18	4.12e-08	144595	1.1846
Teniposide	D17	1.23e-07	104277	0.854295
Teniposide	D16	3.7e-07	98644	0.808147
Teniposide	D15	1.11e-06	103543	0.848282
Teniposide	D14	3.33e-06	85739	0.702422
Teniposide	D13	1e-05	103004	0.843866
Trametinib	F18	4.12e-08	58089	0.475897
Trametinib	F17	1.23e-07	72078	0.590503
Trametinib	F16	3.7e-07	82222	0.673608
Trametinib	F15	1.11e-06	92936	0.761384
Trametinib	F14	3.33e-06	90254	0.739411
Trametinib	F13	1e-05	37220	0.304927
Vandetanib	M24	4.12e-08	133930	1.09723
Vandetanib	M23	1.23e-07	126481	1.0362
Vandetanib	M22	3.7e-07	137722	1.1283
Vandetanib	M21	1.11e-06	117693	0.964207
Vandetanib	M20	3.33e-06	77941	0.638536
Vandetanib	M19	1e-05	2189	0.0179335
Veliparib	O18	4.12e-08	84832	0.694991
Veliparib	O17	1.23e-07	137072	1.12297
Veliparib	O16	3.7e-07	132491	1.08544
Veliparib	O15	1.11e-06	142896	1.17068
Veliparib	O14	3.33e-06	136843	1.12109
Veliparib	O13	1e-05	129475	1.06073
Vemurafenib	J06	4.12e-08	124755	1.02206
Vemurafenib	J05	1.23e-07	112795	0.92408
Vemurafenib	J04	3.7e-07	127488	1.04445
Vemurafenib	J03	1.11e-06	131240	1.07519
Vemurafenib	J02	3.33e-06	158376	1.2975
Vemurafenib	J01	1e-05	147631	1.20948
Vismodegib	J24	4.12e-08	138952	1.13837
Vismodegib	J23	1.23e-07	125678	1.02962
Vismodegib	J22	3.7e-07	118972	0.974685
Vismodegib	J21	1.11e-06	124058	1.01635
Vismodegib	J20	3.33e-06	117953	0.966337
Vismodegib	J19	1e-05	120597	0.987998
Vorinostat	H12	4.12e-08	126742	1.03834
Vorinostat	H11	1.23e-07	123827	1.01446
Vorinostat	H10	3.7e-07	119875	0.982083
Vorinostat	H09	1.11e-06	112220	0.919369
Vorinostat	H08	3.33e-06	144385	1.18288
Vorinostat	H07	1e-05	116309	0.952868
Allopurinol	C18	4.88e-09	115961	1.13912
Allopurinol	C17	1.95e-08	118888	1.16787
Allopurinol	C16	7.81e-08	129472	1.27184
Allopurinol	C15	3.13e-07	119235	1.17128
Allopurinol	C14	1.25e-06	117241	1.15169
Allopurinol	C13	5e-06	112324	1.10339
Altretamine	F24	4.88e-09	129898	1.27602
Altretamine	F23	1.95e-08	121896	1.19742
Altretamine	F22	7.81e-08	113908	1.11895
Altretamine	F21	3.13e-07	125746	1.23524
Altretamine	F20	1.25e-06	115870	1.13822
Altretamine	F19	5e-06	111461	1.09491
Bleomycin	G24	4.88e-09	106731	1.04845
Bleomycin	G23	1.95e-08	101166	0.993782
Bleomycin	G22	7.81e-08	113706	1.11697
Bleomycin	G21	3.13e-07	126631	1.24393
Bleomycin	G20	1.25e-06	115392	1.13353
Bleomycin	G19	5e-06	100354	0.985805
Busulfan	C06	4.88e-09	94243	0.925775
Busulfan	C05	1.95e-08	136640	1.34225
Busulfan	C04	7.81e-08	134402	1.32027
Busulfan	C03	3.13e-07	141494	1.38994
Busulfan	C02	1.25e-06	149165	1.46529
Busulfan	C01	5e-06	151440	1.48764
Cabazitaxel	F12	4.88e-09	117211	1.1514
Cabazitaxel	F11	1.95e-08	94890	0.932131
Cabazitaxel	F10	7.81e-08	69993	0.687561
Cabazitaxel	F09	3.13e-07	70111	0.68872
Cabazitaxel	F08	1.25e-06	73844	0.72539
Cabazitaxel	F07	5e-06	71651	0.703848
Carfilzomib	K12	4.88e-09	102335	1.00527
Carfilzomib	K11	1.95e-08	104990	1.03135
Carfilzomib	K10	7.81e-08	6913	0.0679083
Carfilzomib	K09	3.13e-07	988	0.0097054
Carfilzomib	K08	1.25e-06	831	0.00816315
Carfilzomib	K07	5e-06	1088	0.0106877
Cisplatin	E24	1.46e-09	130902	1.31668
Cisplatin	E23	5.86e-09	125198	1.25931
Cisplatin	E22	2.34e-08	123603	1.24327
Cisplatin	E21	9.38e-08	116000	1.16679
Cisplatin	E20	3.75e-07	104251	1.04861
Cisplatin	E19	1.5e-06	130719	1.31484
Cyclophosphamide	D06	4.88e-09	120156	1.18033
Cyclophosphamide	D05	1.95e-08	123777	1.2159
Cyclophosphamide	D04	7.81e-08	126583	1.24346
Cyclophosphamide	D03	3.13e-07	129654	1.27363
Cyclophosphamide	D02	1.25e-06	135672	1.33274
Cyclophosphamide	D01	5e-06	139301	1.36839
Cytarabine	E18	4.88e-09	112857	1.10863
Cytarabine	E17	1.95e-08	124672	1.22469
Cytarabine	E16	7.81e-08	125792	1.23569
Cytarabine	E15	3.13e-07	129971	1.27674
Cytarabine	E14	1.25e-06	88669	0.87102
Cytarabine	E13	5e-06	36987	0.363334
Daunorubicin	H18	4.88e-09	106600	1.04716
Daunorubicin	H17	1.95e-08	105664	1.03797
Daunorubicin	H16	7.81e-08	120100	1.17978
Daunorubicin	H15	3.13e-07	74566	0.732483
Daunorubicin	H14	1.25e-06	4698	0.0461498
Daunorubicin	H13	5e-06	1385	0.0136052
Docetaxel	G12	4.88e-09	121309	1.19165
Docetaxel	G11	1.95e-08	82092	0.806413
Docetaxel	G10	7.81e-08	59798	0.587412
Docetaxel	G09	3.13e-07	69471	0.682433
Docetaxel	G08	1.25e-06	66229	0.650586
Docetaxel	G07	5e-06	68022	0.668199
Doxorubicin	C12	4.88e-09	124492	1.22292
Doxorubicin	C11	1.95e-08	143664	1.41125
Doxorubicin	C10	7.81e-08	102038	1.00235
Doxorubicin	C09	3.13e-07	98993	0.972436
Doxorubicin	C08	1.25e-06	57086	0.560772
Doxorubicin	C07	5e-06	1515	0.0148823
Epirubicin	D12	4.88e-09	123621	1.21436
Epirubicin	D11	1.95e-08	123630	1.21445
Epirubicin	D10	7.81e-08	135356	1.32964
Epirubicin	D09	3.13e-07	94977	0.932986
Epirubicin	D08	1.25e-06	1678	0.0164835
Epirubicin	D07	5e-06	1505	0.014784
Ethinyl estradiol	E12	4.88e-09	122143	1.19984
Ethinyl estradiol	E11	1.95e-08	119608	1.17494
Ethinyl estradiol	E10	7.81e-08	114913	1.12882
Ethinyl estradiol	E09	3.13e-07	124742	1.22538
Ethinyl estradiol	E08	1.25e-06	124520	1.22319
Ethinyl estradiol	E07	5e-06	124930	1.22722
Etoposide	I18	4.88e-09	103407	1.0158
Etoposide	I17	1.95e-08	113069	1.11071
Etoposide	I16	7.81e-08	114278	1.12258
Etoposide	I15	3.13e-07	125195	1.22983
Etoposide	I14	1.25e-06	99140	0.97388
Etoposide	I13	5e-06	91556	0.89938
Fluorouracil	I06	4.88e-09	105102	1.03245
Fluorouracil	I05	1.95e-08	118040	1.15954
Fluorouracil	I04	7.81e-08	108611	1.06692
Fluorouracil	I03	3.13e-07	122066	1.19909
Fluorouracil	I02	1.25e-06	141334	1.38836
Fluorouracil	I01	5e-06	142145	1.39633
Gemcitabine	J06	4.88e-09	54620	0.536548
Gemcitabine	J05	1.95e-08	35707	0.35076
Gemcitabine	J04	7.81e-08	36212	0.355721
Gemcitabine	J03	3.13e-07	41297	0.405672
Gemcitabine	J02	1.25e-06	40852	0.401301
Gemcitabine	J01	5e-06	43895	0.431193
Hydroxyurea	K18	4.88e-09	100393	0.986188
Hydroxyurea	K17	1.95e-08	105622	1.03755
Hydroxyurea	K16	7.81e-08	107089	1.05197
Hydroxyurea	K15	3.13e-07	106751	1.04864
Hydroxyurea	K14	1.25e-06	109235	1.07305
Hydroxyurea	K13	5e-06	102955	1.01136
Idarubicin	G18	4.88e-09	102689	1.00874
Idarubicin	G17	1.95e-08	113715	1.11705
Idarubicin	G16	7.81e-08	93708	0.92052
Idarubicin	G15	3.13e-07	6811	0.0669064
Idarubicin	G14	1.25e-06	793	0.00778986
Idarubicin	G13	5e-06	1136	0.0111592
Ixabepilone	H12	4.88e-09	130939	1.28625
Ixabepilone	H11	1.95e-08	98968	0.97219
Ixabepilone	H10	7.81e-08	80918	0.79488
Ixabepilone	H09	3.13e-07	79052	0.77655
Ixabepilone	H08	1.25e-06	83455	0.819802
Ixabepilone	H07	5e-06	70334	0.690911
Methotrexate	H06	4.88e-09	107601	1.05699
Methotrexate	H05	1.95e-08	111129	1.09165
Methotrexate	H04	7.81e-08	118871	1.1677
Methotrexate	H03	3.13e-07	111159	1.09195
Methotrexate	H02	1.25e-06	103392	1.01565
Methotrexate	H01	5e-06	112127	1.10145
Mitomycin	D24	4.88e-09	139297	1.36835
Mitomycin	D23	1.95e-08	139554	1.37088
Mitomycin	D22	7.81e-08	130261	1.27959
Mitomycin	D21	3.13e-07	116164	1.14111
Mitomycin	D20	1.25e-06	89517	0.87935
Mitomycin	D19	5e-06	35837	0.352037
Paclitaxel	J18	4.88e-09	117166	1.15095
Paclitaxel	J17	1.95e-08	114060	1.12044
Paclitaxel	J16	7.81e-08	115424	1.13384
Paclitaxel	J15	3.13e-07	109830	1.07889
Paclitaxel	J14	1.25e-06	85164	0.83659
Paclitaxel	J13	5e-06	76591	0.752375
Pemetrexed	F06	4.88e-09	132407	1.33182
Pemetrexed	F05	1.95e-08	138366	1.39176
Pemetrexed	F04	7.81e-08	123960	1.24686
Pemetrexed	F03	3.13e-07	134297	1.35083
Pemetrexed	F02	1.25e-06	127603	1.2835
Pemetrexed	F01	5e-06	120456	1.21161
Pentostatin	D18	4.88e-09	122934	1.20762
Pentostatin	D17	1.95e-08	121487	1.1934
Pentostatin	D16	7.81e-08	121567	1.19419
Pentostatin	D15	3.13e-07	110348	1.08398
Pentostatin	D14	1.25e-06	113105	1.11106
Pentostatin	D13	5e-06	99855	0.980904
Pralatrexate	G06	4.88e-09	118735	1.16637
Pralatrexate	G05	1.95e-08	116188	1.14135
Pralatrexate	G04	7.81e-08	108290	1.06376
Pralatrexate	G03	3.13e-07	111829	1.09853
Pralatrexate	G02	1.25e-06	126372	1.24139
Pralatrexate	G01	5e-06	112375	1.10389
SN-38	H24	4.88e-09	120945	1.18808
SN-38	H23	1.95e-08	124480	1.2228
SN-38	H22	7.81e-08	92138	0.905097
SN-38	H21	3.13e-07	87768	0.86217
SN-38	H20	1.25e-06	87254	0.85712
SN-38	H19	5e-06	79132	0.777336
Temozolomide	E06	4.88e-09	129117	1.26835
Temozolomide	E05	1.95e-08	115290	1.13253
Temozolomide	E04	7.81e-08	132077	1.29743
Temozolomide	E03	3.13e-07	128273	1.26006
Temozolomide	E02	1.25e-06	132045	1.29711
Temozolomide	E01	5e-06	135365	1.32973
Topotecan	F18	4.88e-09	127358	1.25107
Topotecan	F17	1.95e-08	132333	1.29994
Topotecan	F16	7.81e-08	124612	1.2241
Topotecan	F15	3.13e-07	103987	1.02149
Topotecan	F14	1.25e-06	93253	0.91605
Topotecan	F13	5e-06	43528	0.427588
Vinblastine	J12	4.88e-09	121018	1.18879
Vinblastine	J11	1.95e-08	83395	0.819212
Vinblastine	J10	7.81e-08	73189	0.718956
Vinblastine	J09	3.13e-07	35296	0.346722
Vinblastine	J08	1.25e-06	17646	0.173342
Vinblastine	J07	5e-06	2897	0.028458
Vincristine	K06	4.88e-09	70347	0.691038
Vincristine	K05	1.95e-08	59961	0.589014
Vincristine	K04	7.81e-08	38726	0.380416
Vincristine	K03	3.13e-07	29047	0.285337
Vincristine	K02	1.25e-06	6951	0.0682816
Vincristine	K01	5e-06	2568	0.0252262
Vinorelbine	I12	4.88e-09	117909	1.15825
Vinorelbine	I11	1.95e-08	86969	0.854321
Vinorelbine	I10	7.81e-08	81516	0.800754
Vinorelbine	I09	3.13e-07	36546	0.359002
Vinorelbine	I08	1.25e-06	22380	0.219845
Vinorelbine	I07	5e-06	3164	0.0310809
Abemaciclib	H06	4.12e-08	103640	1.04967
Abemaciclib	H05	1.23e-07	108646	1.10037
Abemaciclib	H04	3.7e-07	114389	1.15854
Abemaciclib	H03	1.11e-06	107563	1.08941
Abemaciclib	H02	3.33e-06	103094	1.04414
Abemaciclib	H01	1e-05	100800	1.02091
Afatinib	J24	4.12e-08	128709	1.30357
Afatinib	J23	1.23e-07	80486	0.815168
Afatinib	J22	3.7e-07	71104	0.720146
Afatinib	J21	1.11e-06	69597	0.704883
Afatinib	J20	3.33e-06	60430	0.612039
Afatinib	J19	1e-05	50409	0.510546
Afuresertib	B06	4.12e-08	117354	1.18857
Afuresertib	B05	1.23e-07	115359	1.16836
Afuresertib	B04	3.7e-07	120656	1.22201
Afuresertib	B03	1.11e-06	96655	0.978929
Afuresertib	B02	3.33e-06	68091	0.68963
Afuresertib	B01	1e-05	37464	0.379438
Alisertib	C06	4.12e-08	132614	1.34312
Alisertib	C05	1.23e-07	133279	1.34986
Alisertib	C04	3.7e-07	105826	1.07181
Alisertib	C03	1.11e-06	80314	0.813426
Alisertib	C02	3.33e-06	79802	0.80824
Alisertib	C01	1e-05	76483	0.774625
Apitolisib	J18	4.12e-08	116355	1.17845
Apitolisib	J17	1.23e-07	102151	1.03459
Apitolisib	J16	3.7e-07	46749	0.473477
Apitolisib	J15	1.11e-06	23806	0.241109
Apitolisib	J14	3.33e-06	14823	0.150128
Apitolisib	J13	1e-05	9493	0.0961458
AT7519	G06	4.12e-08	102306	1.03616
AT7519	G05	1.23e-07	128821	1.30471
AT7519	G04	3.7e-07	134401	1.36122
AT7519	G03	1.11e-06	123411	1.24992
AT7519	G02	3.33e-06	120121	1.21659
AT7519	G01	1e-05	4599	0.046579
AZD5363	B24	4.12e-08	110838	1.12257
AZD5363	B23	1.23e-07	108156	1.09541
AZD5363	B22	3.7e-07	115638	1.17119
AZD5363	B21	1.11e-06	113574	1.15029
AZD5363	B20	3.33e-06	103481	1.04806
AZD5363	B19	1e-05	73107	0.740433
Binimetinib	D18	4.12e-08	126203	1.27819
Binimetinib	D17	1.23e-07	106549	1.07914
Binimetinib	D16	3.7e-07	95622	0.968466
Binimetinib	D15	1.11e-06	77134	0.781219
Binimetinib	D14	3.33e-06	61472	0.622593
Binimetinib	D13	1e-05	51614	0.52275
BML-EI388	J06	4.12e-08	112493	1.13934
BML-EI388	J05	1.23e-07	107548	1.08925
BML-EI388	J04	3.7e-07	108868	1.10262
BML-EI388	J03	1.11e-06	106211	1.07571
BML-EI388	J02	3.33e-06	104642	1.05982
BML-EI388	J01	1e-05	108689	1.10081
Capmatinib	C12	1.99e-08	125499	1.27106
Capmatinib	C11	5.98e-08	114170	1.15632
Capmatinib	C10	1.79e-07	119522	1.21053
Capmatinib	C09	5.38e-07	112438	1.13878
Capmatinib	C08	1.61e-06	126906	1.28531
Capmatinib	C07	4.84e-06	131811	1.33499
CPI-203	F06	4.12e-08	130422	1.32092
CPI-203	F05	1.23e-07	103410	1.04734
CPI-203	F04	3.7e-07	77592	0.785857
CPI-203	F03	1.11e-06	61789	0.625803
CPI-203	F02	3.33e-06	48484	0.491049
CPI-203	F01	1e-05	40622	0.411422
Defactinib	H12	4.03e-08	94880	0.960951
Defactinib	H11	1.21e-07	99520	1.00795
Defactinib	H10	3.63e-07	94038	0.952423
Defactinib	H09	1.09e-06	95529	0.967524
Defactinib	H08	3.26e-06	108060	1.09444
Defactinib	H07	9.79e-06	106832	1.082
Duvelisib	K18	4.12e-08	108257	1.09643
Duvelisib	K17	1.23e-07	103596	1.04923
Duvelisib	K16	3.7e-07	111916	1.13349
Duvelisib	K15	1.11e-06	113075	1.14523
Duvelisib	K14	3.33e-06	109885	1.11292
Duvelisib	K13	1e-05	75454	0.764203
Entinostat	J12	4.12e-08	107415	1.08791
Entinostat	J11	1.23e-07	100248	1.01532
Entinostat	J10	3.7e-07	90535	0.916945
Entinostat	J09	1.11e-06	115782	1.17265
Entinostat	J08	3.33e-06	87353	0.884717
Entinostat	J07	1e-05	7691	0.077895
Erdafitinib	I12	4.12e-08	108614	1.10005
Erdafitinib	I11	1.23e-07	98649	0.999124
Erdafitinib	I10	3.7e-07	87338	0.884565
Erdafitinib	I09	1.11e-06	102458	1.0377
Erdafitinib	I08	3.33e-06	96089	0.973196
Erdafitinib	I07	1e-05	48474	0.490948
GDC0994	E12	4.12e-08	119628	1.2116
GDC0994	E11	1.23e-07	123125	1.24702
GDC0994	E10	3.7e-07	125256	1.2686
GDC0994	E09	1.11e-06	117028	1.18527
GDC0994	E08	3.33e-06	105791	1.07146
GDC0994	E07	1e-05	100303	1.01588
GF-109203	C24	4.12e-08	129501	1.3116
GF-109203	C23	1.23e-07	114540	1.16007
GF-109203	C22	3.7e-07	115982	1.17467
GF-109203	C21	1.11e-06	108603	1.09994
GF-109203	C20	3.33e-06	119730	1.21263
GF-109203	C19	1e-05	125166	1.26769
GSK2636771	I18	4.12e-08	102978	1.04297
GSK2636771	I17	1.23e-07	115926	1.17411
GSK2636771	I16	3.7e-07	114669	1.16138
GSK2636771	I15	1.11e-06	112818	1.14263
GSK2636771	I14	3.33e-06	109253	1.10652
GSK2636771	I13	1e-05	99563	1.00838
GSK503	G12	4.12e-08	107909	1.09291
GSK503	G11	1.23e-07	122188	1.23753
GSK503	G10	3.7e-07	97763	0.99015
GSK503	G09	1.11e-06	114943	1.16415
GSK503	G08	3.33e-06	94825	0.960394
GSK503	G07	1e-05	98476	0.997372
Imiquimod	G24	4.12e-08	119010	1.20534
Imiquimod	G23	1.23e-07	115471	1.1695
Imiquimod	G22	3.7e-07	100886	1.02178
Imiquimod	G21	1.11e-06	106628	1.07994
Imiquimod	G20	3.33e-06	108594	1.09985
Imiquimod	G19	1e-05	107894	1.09276
Linsitinib	B18	4.12e-08	96820	0.9806
Linsitinib	B17	1.23e-07	105645	1.06998
Linsitinib	B16	3.7e-07	114690	1.16159
Linsitinib	B15	1.11e-06	104368	1.05705
Linsitinib	B14	3.33e-06	93761	0.949618
Linsitinib	B13	1e-05	4089	0.0414137
Midostaurin	D24	4.12e-08	114278	1.15742
Midostaurin	D23	1.23e-07	117070	1.18569
Midostaurin	D22	3.7e-07	112917	1.14363
Midostaurin	D21	1.11e-06	108913	1.10308
Midostaurin	D20	3.33e-06	112813	1.14258
Midostaurin	D19	1e-05	136785	1.38537
Momelotinib	C18	4.12e-08	108825	1.10219
Momelotinib	C17	1.23e-07	124156	1.25746
Momelotinib	C16	3.7e-07	108765	1.10158
Momelotinib	C15	1.11e-06	104862	1.06205
Momelotinib	C14	3.33e-06	116618	1.18112
Momelotinib	C13	1e-05	117834	1.19343
Nilotinib	H24	4.12e-08	106824	1.08192
Nilotinib	H23	1.23e-07	115599	1.17079
Nilotinib	H22	3.7e-07	99227	1.00498
Nilotinib	H21	1.11e-06	97845	0.990981
Nilotinib	H20	3.33e-06	101241	1.02538
Nilotinib	H19	1e-05	97832	0.990849
Onalespib	K12	4.12e-08	105870	1.07226
Onalespib	K11	1.23e-07	89603	0.907505
Onalespib	K10	3.7e-07	54140	0.548334
Onalespib	K09	1.11e-06	1720	0.0174203
Onalespib	K08	3.33e-06	1167	0.0118195
Onalespib	K07	1e-05	1306	0.0132273
Oprozomib	E24	4.12e-08	14157	0.143383
Oprozomib	E23	1.23e-07	3046	0.0308501
Oprozomib	E22	3.7e-07	1863	0.0188686
Oprozomib	E21	1.11e-06	1455	0.0147363
Oprozomib	E20	3.33e-06	1447	0.0146553
Oprozomib	E19	1e-05	2135	0.0216234
Pictilisib	G18	4.12e-08	111467	1.12895
Pictilisib	G17	1.23e-07	110852	1.12272
Pictilisib	G16	3.7e-07	108383	1.09771
Pictilisib	G15	1.11e-06	102940	1.04258
Pictilisib	G14	3.33e-06	105627	1.0698
Pictilisib	G13	1e-05	117787	1.19295
Pinometostat	D12	4.12e-08	119447	1.20977
Pinometostat	D11	1.23e-07	115551	1.17031
Pinometostat	D10	3.7e-07	109657	1.11061
Pinometostat	D09	1.11e-06	118350	1.19866
Pinometostat	D08	3.33e-06	117658	1.19165
Pinometostat	D07	1e-05	117114	1.18614
Regorafenib	I24	4.12e-08	117825	1.19334
Regorafenib	I23	1.23e-07	114426	1.15891
Regorafenib	I22	3.7e-07	108674	1.10066
Regorafenib	I21	1.11e-06	111987	1.13421
Regorafenib	I20	3.33e-06	103719	1.05047
Regorafenib	I19	1e-05	104917	1.06261
Ribociclib	I06	4.12e-08	105101	1.06447
Ribociclib	I05	1.23e-07	123172	1.24749
Ribociclib	I04	3.7e-07	114053	1.15514
Ribociclib	I03	1.11e-06	118493	1.20011
Ribociclib	I02	3.33e-06	119208	1.20735
Ribociclib	I01	1e-05	122350	1.23917
Sepantronium	E06	4.12e-08	120667	1.22212
Sepantronium	E05	1.23e-07	113379	1.14831
Sepantronium	E04	3.7e-07	124717	1.26314
Sepantronium	E03	1.11e-06	134626	1.3635
Sepantronium	E02	3.33e-06	71473	0.723884
Sepantronium	E01	1e-05	1933	0.0195776
Talazoparib	H18	4.12e-08	121542	1.23099
Talazoparib	H17	1.23e-07	132976	1.34679
Talazoparib	H16	3.7e-07	127836	1.29473
Talazoparib	H15	1.11e-06	104631	1.05971
Talazoparib	H14	3.33e-06	92300	0.934821
Talazoparib	H13	1e-05	82756	0.838159
Tazemetostat	F12	4.12e-08	112386	1.13825
Tazemetostat	F11	1.23e-07	106663	1.08029
Tazemetostat	F10	3.7e-07	116676	1.1817
Tazemetostat	F09	1.11e-06	110344	1.11757
Tazemetostat	F08	3.33e-06	104934	1.06278
Tazemetostat	F07	1e-05	109605	1.11009
Temsirolimus	E18	4.12e-08	127188	1.28817
Temsirolimus	E17	1.23e-07	119866	1.21401
Temsirolimus	E16	3.7e-07	79680	0.807005
Temsirolimus	E15	1.11e-06	76029	0.770027
Temsirolimus	E14	3.33e-06	65049	0.658821
Temsirolimus	E13	1e-05	64652	0.6548
Toremifene	F18	4.12e-08	103958	1.05289
Toremifene	F17	1.23e-07	125645	1.27254
Toremifene	F16	3.7e-07	126809	1.28433
Toremifene	F15	1.11e-06	107792	1.09172
Toremifene	F14	3.33e-06	119026	1.2055
Toremifene	F13	1e-05	114037	1.15497
Tretinoin	F24	4.12e-08	120566	1.2211
Tretinoin	F23	1.23e-07	119068	1.20593
Tretinoin	F22	3.7e-07	121031	1.22581
Tretinoin	F21	1.11e-06	117488	1.18993
Tretinoin	F20	3.33e-06	121030	1.2258
Tretinoin	F19	1e-05	103129	1.0445
Venetoclax	D06	4.12e-08	123551	1.25133
Venetoclax	D05	1.23e-07	120803	1.2235
Venetoclax	D04	3.7e-07	120236	1.21776
Venetoclax	D03	1.11e-06	115338	1.16815
Venetoclax	D02	3.33e-06	139754	1.41544
Venetoclax	D01	1e-05	132985	1.34688

## Sheet: WT single stats
Drug	Type	Status	Target_Full	Cmax	inhibitionCmax	norm.AUC	Z.score
Oprozomib	Chemotherapy	Phase II	Proteasome	2.40326e-07	97.9871	0.0284503	-1.13247
Vincristine	Chemotherapy	Approved	microtubule inhibitor	2.36935e-07	72.9374	0.336307	-0.0489036
Carfilzomib	Chemotherapy	Approved	20S proteasome inhibitor	2.88508e-06	99.0322	0.36894	-0.0139547
Gemcitabine	Chemotherapy	Approved	antimetabolite - pyrimidine antagonist	3.20002e-06	59.9513	0.40672	0.109341
Vinorelbine	Chemotherapy	Approved	microtubule inhibitor	1.2047e-07	41.0651	0.561207	0.395609
Vinblastine	Chemotherapy	Approved	microtubule inhibitor	2.4058e-07	59.1107	0.522768	0.4537
Idarubicin	Chemotherapy	Approved	topoisomerase II inhibitor	2.77177e-08	-5.75843	0.513866	0.550632
Hydroxyurea	Chemotherapy	Approved	ribonucleotide reductase inhibitor	0.00037999	-4.90118	1.04009	0.607011
Teniposide	Chemotherapy	Approved	topoisomerase II inhibitor	6.09149e-05	19.1698	0.843104	0.704524
Daunorubicin	Chemotherapy	Approved	DNA intercalating agent, anthracycline antitumor antibiotic	3.46906e-07	33.8625	0.683677	1.20574
Docetaxel	Chemotherapy	Approved	microtubule inhibitor	4.36947e-06	34.7503	0.747893	1.40734
Methotrexate	Chemotherapy	Approved	folic acid antagonist	2.29999e-06	-9.36497	1.0886	1.28576
Cabazitaxel	Chemotherapy	Approved	microtubule inhibitor, taxane	6.40006e-07	29.9867	0.789545	1.42814
Pralatrexate	Chemotherapy	Approved	antifolate	2.24788e-05	-11.0547	1.12756	1.45219
Bleomycin	Chemotherapy	Approved	inhibition of DNA synthesis	2.24648e-07	-13.1349	1.0886	1.46259
Ixabepilone	Chemotherapy	Approved	microtubule inhibitor	1.25001e-05	23.122	0.862771	1.49594
Pentostatin	Chemotherapy	Approved	purine analog	4.65204e-07	-12.745	1.13845	1.62921
Allopurinol	Chemotherapy	Approved	xanthine oxidase inhibitor	9.11014e-06	-10.3391	1.16123	1.69546
Cytarabine	Chemotherapy	Approved	antimetabolite, inhibits DNA synthesis	0.000164462	63.6637	1.05684	1.7221
Cyclophosphamide	Chemotherapy	Approved	alkylating agent, inhibits DNA replication and RNA synthesis	0.000132523	-36.9085	1.2645	1.71559
Pemetrexed	Chemotherapy	Approved	antifolate	0.000256696	-21.1608	1.3095	1.72579
Altretamine	Chemotherapy	Approved	alkylating antineoplastic agent	9.89157e-05	-10.2565	1.17464	1.7721
Etoposide	Chemotherapy	Approved	topoisomerase II inhibitor	3.39814e-05	10.0612	1.07003	1.7798
Epirubicin	Chemotherapy	Approved	topoisomerase II inhibitor	1.71098e-05	98.4375	0.777134	1.82007
Fluorouracil	Chemotherapy	Approved	antimetabolite - thymidylate synthase inhibitor	0.000425901	-39.5101	1.19339	1.81921
Paclitaxel	Chemotherapy	Approved	microtubule inhibitor, taxane	6.90942e-06	24.7625	1.02547	1.84858
Mitomycin	Chemotherapy	Approved	antitumor antibiotic	2.11769e-06	28.0808	1.11372	1.94045
Topotecan	Chemotherapy	Approved	topoisomerase I inhibitor	1.56102e-07	-17.1257	1.07404	2.00431
Doxorubicin	Chemotherapy	Approved	topoisomerase II inhibitor	6.85643e-07	24.5808	0.911401	2.037
Temozolomide	Chemotherapy	Approved	alkylating agent	7.15938e-05	-32.974	1.26479	1.97684
SN-38	Chemotherapy	Approved	topoisomerase, active metabolite of irinotecan	#N/A	#N/A	0.975985	2.04657
Busulfan	Chemotherapy	Approved	alkylating antineoplastic agent	1.46161e-05	-44.7334	1.36322	2.52717
Ethinyl estradiol	Chemotherapy	Approved	estrogen hormone	4.35623e-10	-17.2863	1.19819	3.389
Cisplatin	Chemotherapy	Approved	platinum alkylating agent, inhibits DNA replication	8.39972e-06	-17.3684	1.21447	3.39888
Cobimetinib	Targeted	Approved	MEK	5.13834e-07	64.0541	0.428224	-0.974452
Imatinib	Targeted	Approved	Bcr-Abl	6.86787e-06	26.5558	0.792335	-1.05024
Rigosertib	Targeted	Phase III	Plk1, PI3K	1.26404e-05	97.5134	0.224946	-0.560028
Tamoxifen	Targeted	Approved	selective estrogen receptor modulator	7.7532e-08	5.71788	0.913231	-1.36503
Taselisib	Targeted	Phase III (Potentially Discontinued per Hartmut)	PIK3CA	7.64334e-08	4.8859	0.546738	-0.618467
Sunitinib	Targeted	Approved	VEGFR, PDGFR, c-KIT, RET, CD114, CD135	7.02681e-08	12.4503	0.871043	-0.871765
Lapatinib	Targeted	Approved	EGFR, HER2	4.04435e-06	2.55683	0.917177	-1.00927
Cediranib	Targeted	Phase III	VEGFR	4.08431e-07	11.9782	0.885568	-0.866043
Everolimus	Targeted	Approved	mTORC1	3.86131e-08	-6.07715	0.71963	-0.498808
Poziotinib	Targeted	Phase II	EGFR, HER2, HER4	1.72242e-07	31.8223	0.640214	-0.349698
Megestrol	Targeted	Approved	Progesterone receptor agonist	1.95834e-06	8.96031	0.951613	-0.6782
Trametinib	Targeted	Approved	MEK1, MEK2	3.60744e-08	52.4099	0.633077	-0.315985
Apitolisib	Targeted	Phase II	mTOR, PI3Kα, PI3Kβ, PI3Kδ, PI3Kγ	2.22623e-08	-18.0921	0.500392	-0.280597
Dasatinib	Targeted	Approved	Bcr-Abl, Src	4.16774e-07	33.1927	0.557598	-0.276052
Onalespib	Targeted	Phase II	Hsp90	2.84234e-06	99.1235	0.419586	0.0350944
BMS-754807	Targeted	Discontinued	IGF-1R, InsR	7.1e-08	-4.12807	0.671349	-0.0873576
Rucaparib	Targeted	Approved	PARP1, PARP2, PARP3	1.69926e-06	7.70143	0.964441	-0.380172
Vismodegib	Targeted	Approved	SMO receptor antagonist	3.09046e-05	1.64652	1.00622	-0.442261
Afatinib	Targeted	Approved	EGFR, HER2	3.85235e-07	31.157	0.736188	0.110678
Ruxolitinib	Targeted	Approved	JAK1, JAK2	9.33527e-07	3.2948	0.968103	-0.307914
Vandetanib	Targeted	Approved	VEGFR2, EGFR, RET	4.56087e-06	53.144	0.874699	0.0531152
Olaparib	Targeted	Approved	PARP	3.2684e-05	4.16858	0.961207	-0.107671
Temsirolimus	Targeted	Approved	mTOR inhibitor	2.71769e-06	32.4856	0.870906	0.228804
NVP-BGT226	Targeted	Phase II	PI3Kα, PI3Kβ, PI3Kγ, mTORC1, mTORC2	8.00794e-09	-3.92173	0.607998	0.376595
Buparlisib	Targeted	Phase III	Pan-class I PI3K	4.7028e-06	77.7965	0.767452	0.3161
MK2206	Targeted	Phase II	Akt1, Akt2, Akt3	4.66038e-07	-1.34231	0.991407	0.230301
Cabozantinib	Targeted	Approved	c-MET, VEGFR2	7.05868e-06	-3.05337	0.998023	0.273364
Ponatinib	Targeted	Approved	Bcr-Abl, VEGF	1.02712e-07	51.7727	0.876006	0.564601
Binimetinib	Targeted	Approved	Mek	1.11733e-06	22.1738	0.871079	0.620401
Pazopanib	Targeted	Approved	c-KIT, FGFR, PDGFR, VEGFR	1.22368e-07	3.67813	1.06582	0.136446
AZD1775	Targeted	Phase II	Wee1	2.65684e-06	48.1179	0.826734	0.66421
Linsitinib	Targeted	Discontinued	IGF-1R	3.41642e-06	5.67557	0.968826	0.424638
Palbociclib	Targeted	Approved	CDK4, CDK6	3.07866e-07	-3.97797	1.0302	0.344135
Defactinib	Targeted	Phase II	FAK	1.91972e-06	-8.79547	1.0075	0.463563
Afuresertib	Targeted	Phase I	Akt	#N/A	#N/A	0.962826	0.671648
Nilotinib	Targeted	Approved	Bcr-Abl	4.08052e-06	0.219875	1.04239	0.500508
Celecoxib	Targeted	Phase III	cox-2, cadherin-11	2.11342e-06	-13.3133	1.0104	0.667679
Erlotinib	Targeted	Approved	EGFR, ALK, JAK2 mutant (JAK2V617F)	5.36873e-06	21.9483	0.932547	0.872371
Erdafitinib	Targeted	Phase II	FGFR	6.02393e-06	15.3942	0.968903	0.846259
Neratinib	Targeted	Approved	EGFR, HER1, HER2, HER4	2.13628e-07	-3.74628	1.02782	0.676434
Veliparib	Targeted	Phase III	PARP1, PARP2	1.10003e-05	-11.6132	1.09824	0.656446
AZD4547	Targeted	Phase III	FGFR 1, FGFR2, FGFR3, &lt;FGFR4, &lt;KDR, &lt;MARKs, &lt;IGF1R	#N/A	#N/A	1.02202	0.783439
CPI-203	Targeted	Investigational	BRD2/3/4	#N/A	#N/A	0.758745	1.18755
Idelalisib	Targeted	Approved	PI3K P110δ	7.54412e-06	0.793501	1.04964	0.679311
Osimertinib	Targeted	Approved	EGFR	1.26099e-07	-18.0504	0.964108	1.04658
Alpelisib	Targeted	Phase III	PI3K p110α	4.28115e-06	8.37466	1.02877	0.981004
Dovitinib	Targeted	Phase III	FGFR1, FGFR3, c-KIT, VEGF, PDGFR, CSFR1	5.58061e-07	-5.19111	1.0495	0.918656
AZD5363	Targeted	Phase II	Akt	4.89374e-06	20.136	1.06655	0.985414
Navitoclax	Targeted	Discontinued	Bcl-2, Bcl-XL, Bcl-w	5.73563e-06	11.2138	1.00695	1.16256
Enzalutamide	Targeted	Approved	Androgen receptor antagonist	3.5742e-05	-12.1485	1.03851	1.15667
Lucitanib	Targeted	Phase II	FGFR1, FGFR2, FGFR3, VEGF1, VEGF2, VEGF3, PDGFRα, PDGFRβ	1.03812e-06	-8.66422	1.0858	1.01757
Abemaciclib	Targeted	Phase III	Cdk4, Cdk6	5.88243e-07	-9.82402	1.07746	1.0868
Entinostat	Targeted	Phase III	HDAC1, HDAC3	3e-07	-4.91364	0.883044	1.41119
Sorafenib	Targeted	Approved	VEGFR, PDGFR, Raf	2.11047e-05	-15.2996	1.11237	0.984372
Alisertib	Targeted	Phase II	Aurora A kinase	1.58021e-06	19.7604	1.01822	1.21159
GSK503	Targeted	Investigational	EZH2	6.34173e-05	2.11175	1.07869	1.24239
Quizartinib	Targeted	Phase III	FLT3	3.74554e-06	-14.7224	1.07875	1.26132
Belinostat	Targeted	Approved	histone deacetylase	0.000182926	86.5843	0.895865	1.69999
Vorinostat	Targeted	Approved	histone deacetylase	2.19998e-06	1.37114	0.996693	1.49792
Vemurafenib	Targeted	Approved	BRAF	0.000126551	-25.3491	1.1019	1.26227
Axitinib	Targeted	Approved	VEGFR1, VEGFR2, VEGFR3 KIT, PDGFR	1.06089e-07	-12.3653	1.0906	1.38058
Imiquimod	Targeted	Approved	TLR7, immune response dampener	1.45649e-08	-20.5344	1.1051	1.26243
BML-EI388	Targeted	Investigational	Chk2	#N/A	#N/A	1.08677	1.44721
AZD6482	Targeted	Phase I	PI3Kβ	#N/A	#N/A	1.10102	1.42053
Regorafenib	Targeted	Approved	VEGFR2, TIE2,	8.07762e-06	-6.10427	1.11471	1.5812
Talazoparib	Targeted	Phase II	PARP	6.67804e-08	-30.8965	1.12525	1.65006
Dactolisib	Targeted	Discontinued**	PI3K, mTOR	1.67995e-06	-16.9693	1.09905	1.8496
Capmatinib	Targeted	Phase II	cMET	1.60758e-05	-33.4987	1.21986	1.51162
Momelotinib	Targeted	Phase II	JAK1, JAK2	1.59243e-06	-15.854	1.1442	1.81649
Duvelisib	Targeted	Phase III	PI3Kδ, PI3Kγ	2.18297e-06	-11.1506	1.1002	1.86846
Pictilisib	Targeted	Phase II	PI3Kα, PI3Kδ	2.64e-06	-8.79011	1.09908	1.88489
Tretinoin	Targeted	Approved	RAR agonist (retinoic acid)	2.90579e-07	-21.6288	1.21065	1.76867
Ribociclib	Targeted	Approved	CDK4, CDK6	7.0949e-06	-23.2022	1.17542	1.8549
Fulvestrant	Targeted	Approved	selective estrogen receptor degrader	2.07657e-08	-16.4494	1.14356	1.86063
Dabrafenib	Targeted	Approved	B-Raf	2.84471e-06	-24.9844	1.21702	1.85919
Sepantronium	Targeted	Phase II	BIRC5	6.1917e-08	-24.6635	1.00706	3.18059
Tazemetostat	Targeted	Phase II	EZH2	2.619e-06	-8.64257	1.11552	2.03139
Midostaurin	Targeted	Approved	FLT3, PKCα, PKCβ, PKCγ, Syk, Flk-1, Akt, PKA, c-Kit, FGFR, SRC, PDFRβ, VEGFR1, VEGFR2	1.40019e-06	-14.567	1.14982	1.98739
GSK2636771	Targeted	Phase II	PI3Kβ	1.85961e-05	-0.785225	1.12324	2.10087
GF-109203	Targeted	Investigational	PKCα, PKCβ1	#N/A	#N/A	1.18683	1.93984
GDC0994	Targeted	Phase I	ERK1, ERK2	#N/A	#N/A	1.17293	2.26795
Ibrutinib	Targeted	Approved	BTK	8.69472e-07	-32.9375	1.27706	2.25756
Pinometostat	Targeted	Phase I	DOT-1L	6.04219e-06	-19.1721	1.17797	2.78133
Venetoclax	Targeted	Approved	Bcl2	4.34112e-06	-38.1159	1.26325	2.41509
AT7519	Targeted	Discontinued	Cdk1, Cdk2	1.54613e-06	-25.3724	1.18052	2.92797
Toremifene	Targeted	Approved	Nonsteroidal antiestrogen	1.50481e-06	-17.7905	1.17633	3.00624

## Sheet: FLC clone 14 single
Raw Data - single compound; clone 14
Compound	Well_Coordinate	Concentration	Lum	normLum
Alpelisib	C24	4.12e-08	79805	1.19199
Alpelisib	C23	1.23e-07	69904	1.04411
Alpelisib	C22	3.7e-07	68161	1.01807
Alpelisib	C21	1.11e-06	78935	1.179
Alpelisib	C20	3.33e-06	66817	0.997999
Alpelisib	C19	1e-05	66933	0.999731
Axitinib	G06	4.12e-08	66849	0.998476
Axitinib	G05	1.23e-07	72556	1.08372
Axitinib	G04	3.7e-07	81330	1.21477
Axitinib	G03	1.11e-06	74890	1.11858
Axitinib	G02	3.33e-06	75339	1.12529
Axitinib	G01	1e-05	81651	1.21956
AZD1775	N24	4.12e-08	75885	1.13344
AZD1775	N23	1.23e-07	63691	0.951308
AZD1775	N22	3.7e-07	75559	1.12857
AZD1775	N21	1.11e-06	73016	1.09059
AZD1775	N20	3.33e-06	58869	0.879285
AZD1775	N19	1e-05	67208	1.00384
AZD4547	D12	4.12e-08	83934	1.25366
AZD4547	D11	1.23e-07	65860	0.983705
AZD4547	D10	3.7e-07	65221	0.97416
AZD4547	D09	1.11e-06	59110	0.882884
AZD4547	D08	3.33e-06	69659	1.04045
AZD4547	D07	1e-05	80445	1.20155
AZD6482	D24	4.12e-08	70039	1.04612
AZD6482	D23	1.23e-07	73631	1.09977
AZD6482	D22	3.7e-07	62871	0.93906
AZD6482	D21	1.11e-06	69054	1.03141
AZD6482	D20	3.33e-06	61872	0.924139
AZD6482	D19	1e-05	69071	1.03166
Belinostat	I12	4.12e-08	77162	1.15251
Belinostat	I11	1.23e-07	84836	1.26714
Belinostat	I10	3.7e-07	92252	1.3779
Belinostat	I09	1.11e-06	99689	1.48898
Belinostat	I08	3.33e-06	88131	1.31635
Belinostat	I07	1e-05	1595	0.0238234
BMS-754807	K12	4.12e-08	63775	0.952562
BMS-754807	K11	1.23e-07	61914	0.924766
BMS-754807	K10	3.7e-07	60433	0.902645
BMS-754807	K09	1.11e-06	73727	1.10121
BMS-754807	K08	3.33e-06	83021	1.24003
BMS-754807	K07	1e-05	82829	1.23716
Buparlisib	L18	4.12e-08	65890	0.984153
Buparlisib	L17	1.23e-07	65077	0.972009
Buparlisib	L16	3.7e-07	66370	0.991322
Buparlisib	L15	1.11e-06	72674	1.08548
Buparlisib	L14	3.33e-06	85784	1.2813
Buparlisib	L13	1e-05	52568	0.785171
Cabozantinib	G18	4.12e-08	68919	1.02939
Cabozantinib	G17	1.23e-07	68152	1.01794
Cabozantinib	G16	3.7e-07	74568	1.11377
Cabozantinib	G15	1.11e-06	75730	1.13113
Cabozantinib	G14	3.33e-06	73382	1.09606
Cabozantinib	G13	1e-05	68590	1.02448
Cediranib	L24	4.12e-08	69444	1.03724
Cediranib	L23	1.23e-07	72060	1.07631
Cediranib	L22	3.7e-07	67407	1.00681
Cediranib	L21	1.11e-06	63118	0.942749
Cediranib	L20	3.33e-06	60324	0.901017
Cediranib	L19	1e-05	72793	1.08726
Celecoxib	L06	4.12e-08	62859	0.938881
Celecoxib	L05	1.23e-07	65250	0.974593
Celecoxib	L04	3.7e-07	75615	1.12941
Celecoxib	L03	1.11e-06	69274	1.0347
Celecoxib	L02	3.33e-06	69251	1.03435
Celecoxib	L01	1e-05	93552	1.39732
Cobimetinib	E18	4.12e-08	62489	0.933354
Cobimetinib	E17	1.23e-07	79371	1.18551
Cobimetinib	E16	3.7e-07	64409	0.962032
Cobimetinib	E15	1.11e-06	44503	0.66471
Cobimetinib	E14	3.33e-06	29351	0.438395
Cobimetinib	E13	1e-05	12289	0.183552
Dabrafenib	I06	4.12e-08	92137	1.37619
Dabrafenib	I05	1.23e-07	108705	1.62365
Dabrafenib	I04	3.7e-07	112872	1.68589
Dabrafenib	I03	1.11e-06	86018	1.28479
Dabrafenib	I02	3.33e-06	73320	1.09513
Dabrafenib	I01	1e-05	73376	1.09597
Dactolisib	M06	4.12e-08	65362	0.976266
Dactolisib	M05	1.23e-07	70560	1.05391
Dactolisib	M04	3.7e-07	75138	1.12228
Dactolisib	M03	1.11e-06	77864	1.163
Dactolisib	M02	3.33e-06	83075	1.24083
Dactolisib	M01	1e-05	60996	0.911054
Dasatinib	H06	4.12e-08	60731	0.907096
Dasatinib	H05	1.23e-07	51819	0.773984
Dasatinib	H04	3.7e-07	65042	0.971487
Dasatinib	H03	1.11e-06	68573	1.02423
Dasatinib	H02	3.33e-06	58676	0.876402
Dasatinib	H01	1e-05	47536	0.710012
Dovitinib	F12	4.12e-08	73698	1.10078
Dovitinib	F11	1.23e-07	64201	0.958925
Dovitinib	F10	3.7e-07	72085	1.07668
Dovitinib	F09	1.11e-06	66262	0.989709
Dovitinib	F08	3.33e-06	68388	1.02146
Dovitinib	F07	1e-05	75165	1.12269
Enzalutamide	D06	4.12e-08	69072	1.03168
Enzalutamide	D05	1.23e-07	60411	0.902317
Enzalutamide	D04	3.7e-07	63546	0.949142
Enzalutamide	D03	1.11e-06	60883	0.909367
Enzalutamide	D02	3.33e-06	73132	1.09232
Enzalutamide	D01	1e-05	82174	1.22738
Erlotinib	N06	4.12e-08	65023	0.971203
Erlotinib	N05	1.23e-07	57667	0.861331
Erlotinib	N04	3.7e-07	60753	0.907425
Erlotinib	N03	1.11e-06	66679	0.995937
Erlotinib	N02	3.33e-06	67385	1.00648
Erlotinib	N01	1e-05	81477	1.21696
Everolimus	H18	4.12e-08	68556	1.02397
Everolimus	H17	1.23e-07	79245	1.18363
Everolimus	H16	3.7e-07	80067	1.1959
Everolimus	H15	1.11e-06	94646	1.41366
Everolimus	H14	3.33e-06	85214	1.27278
Everolimus	H13	1e-05	90676	1.35436
Fulvestrant	C12	4.12e-08	80208	1.19801
Fulvestrant	C11	1.23e-07	62480	0.93322
Fulvestrant	C10	3.7e-07	69705	1.04113
Fulvestrant	C09	1.11e-06	69451	1.03734
Fulvestrant	C08	3.33e-06	65416	0.977073
Fulvestrant	C07	1e-05	49010	0.732028
Ibrutinib	K06	4.12e-08	69391	1.03644
Ibrutinib	K05	1.23e-07	66731	0.996714
Ibrutinib	K04	3.7e-07	64551	0.964153
Ibrutinib	K03	1.11e-06	77669	1.16009
Ibrutinib	K02	3.33e-06	80720	1.20566
Ibrutinib	K01	1e-05	87840	1.312
Idelalisib	E24	4.12e-08	73353	1.09562
Idelalisib	E23	1.23e-07	66846	0.998432
Idelalisib	E22	3.7e-07	73154	1.09265
Idelalisib	E21	1.11e-06	60080	0.897373
Idelalisib	E20	3.33e-06	66171	0.98835
Idelalisib	E19	1e-05	57269	0.855387
Imatinib	K24	4.12e-08	88802	1.32637
Imatinib	K23	1.23e-07	81231	1.21329
Imatinib	K22	3.7e-07	76426	1.14152
Imatinib	K21	1.11e-06	71013	1.06067
Imatinib	K20	3.33e-06	82603	1.23378
Imatinib	K19	1e-05	120973	1.80689
Lapatinib	L12	4.12e-08	59532	0.889188
Lapatinib	L11	1.23e-07	65449	0.977566
Lapatinib	L10	3.7e-07	65851	0.98357
Lapatinib	L09	1.11e-06	63663	0.950889
Lapatinib	L08	3.33e-06	65294	0.975251
Lapatinib	L07	1e-05	56024	0.836791
Lucitanib	E12	4.12e-08	68042	1.0163
Lucitanib	E11	1.23e-07	62488	0.933339
Lucitanib	E10	3.7e-07	63746	0.952129
Lucitanib	E09	1.11e-06	70705	1.05607
Lucitanib	E08	3.33e-06	83906	1.25324
Lucitanib	E07	1e-05	80687	1.20516
Megestrol	H24	4.12e-08	76733	1.14611
Megestrol	H23	1.23e-07	69152	1.03287
Megestrol	H22	3.7e-07	73242	1.09396
Megestrol	H21	1.11e-06	63337	0.94602
Megestrol	H20	3.33e-06	75992	1.13504
Megestrol	H19	1e-05	73080	1.09154
MK2206	K18	4.12e-08	74728	1.11616
MK2206	K17	1.23e-07	79040	1.18056
MK2206	K16	3.7e-07	66034	0.986303
MK2206	K15	1.11e-06	70212	1.04871
MK2206	K14	3.33e-06	66608	0.994877
MK2206	K13	1e-05	63459	0.947842
Navitoclax	F06	4.12e-08	74917	1.11898
Navitoclax	F05	1.23e-07	74958	1.11959
Navitoclax	F04	3.7e-07	73401	1.09634
Navitoclax	F03	1.11e-06	68451	1.0224
Navitoclax	F02	3.33e-06	67174	1.00333
Navitoclax	F01	1e-05	99426	1.48506
Neratinib	B12	4.12e-08	101669	1.51856
Neratinib	B11	1.23e-07	75256	1.12405
Neratinib	B10	3.7e-07	69432	1.03706
Neratinib	B09	1.11e-06	70269	1.04956
Neratinib	B08	3.33e-06	70432	1.05199
Neratinib	B07	1e-05	72481	1.0826
NVP-BGT226	B24	4.12e-08	83190	1.24255
NVP-BGT226	B23	1.23e-07	78357	1.17036
NVP-BGT226	B22	3.7e-07	94730	1.41492
NVP-BGT226	B21	1.11e-06	130685	1.95195
NVP-BGT226	B20	3.33e-06	90462	1.35117
NVP-BGT226	B19	1e-05	79195	1.18288
Olaparib	M18	4.12e-08	64843	0.968514
Olaparib	M17	1.23e-07	62978	0.940658
Olaparib	M16	3.7e-07	59227	0.884632
Olaparib	M15	1.11e-06	63520	0.948754
Olaparib	M14	3.33e-06	67738	1.01175
Olaparib	M13	1e-05	82928	1.23864
Osimertinib	E06	4.12e-08	78969	1.1795
Osimertinib	E05	1.23e-07	72884	1.08862
Osimertinib	E04	3.7e-07	75901	1.13368
Osimertinib	E03	1.11e-06	70863	1.05843
Osimertinib	E02	3.33e-06	75628	1.1296
Osimertinib	E01	1e-05	79002	1.18
Palbociclib	N12	4.12e-08	70316	1.05026
Palbociclib	N11	1.23e-07	67661	1.0106
Palbociclib	N10	3.7e-07	74826	1.11762
Palbociclib	N09	1.11e-06	69978	1.04521
Palbociclib	N08	3.33e-06	88865	1.32731
Palbociclib	N07	1e-05	78746	1.17617
Pazopanib	O12	4.12e-08	75083	1.12146
Pazopanib	O11	1.23e-07	68737	1.02668
Pazopanib	O10	3.7e-07	67492	1.00808
Pazopanib	O09	1.11e-06	67511	1.00836
Pazopanib	O08	3.33e-06	70669	1.05553
Pazopanib	O07	1e-05	73692	1.10069
Ponatinib	B18	4.12e-08	93725	1.3999
Ponatinib	B17	1.23e-07	143926	2.14972
Ponatinib	B16	3.7e-07	105843	1.5809
Ponatinib	B15	1.11e-06	108991	1.62792
Ponatinib	B14	3.33e-06	111351	1.66317
Ponatinib	B13	1e-05	83362	1.24512
Poziotinib	O24	4.12e-08	78341	1.17012
Poziotinib	O23	1.23e-07	67592	1.00957
Poziotinib	O22	3.7e-07	68190	1.01851
Poziotinib	O21	1.11e-06	63615	0.950173
Poziotinib	O20	3.33e-06	74655	1.11507
Poziotinib	O19	1e-05	69171	1.03316
Quizartinib	G12	4.12e-08	60013	0.896372
Quizartinib	G11	1.23e-07	76500	1.14263
Quizartinib	G10	3.7e-07	69195	1.03352
Quizartinib	G09	1.11e-06	66015	0.98602
Quizartinib	G08	3.33e-06	61466	0.918074
Quizartinib	G07	1e-05	63536	0.948993
Rigosertib	G24	4.12e-08	121606	1.81634
Rigosertib	G23	1.23e-07	120042	1.79298
Rigosertib	G22	3.7e-07	116166	1.73509
Rigosertib	G21	1.11e-06	110942	1.65706
Rigosertib	G20	3.33e-06	103139	1.54051
Rigosertib	G19	1e-05	84071	1.25571
Rucaparib	N18	4.12e-08	66226	0.989171
Rucaparib	N17	1.23e-07	83344	1.24485
Rucaparib	N16	3.7e-07	68898	1.02908
Rucaparib	N15	1.11e-06	66478	0.992935
Rucaparib	N14	3.33e-06	67480	1.0079
Rucaparib	N13	1e-05	66576	0.994399
Ruxolitinib	M12	4.12e-08	61221	0.914415
Ruxolitinib	M11	1.23e-07	64719	0.966662
Ruxolitinib	M10	3.7e-07	71708	1.07105
Ruxolitinib	M09	1.11e-06	68464	1.0226
Ruxolitinib	M08	3.33e-06	75163	1.12266
Ruxolitinib	M07	1e-05	88856	1.32718
Sorafenib	C18	4.12e-08	83519	1.24746
Sorafenib	C17	1.23e-07	72105	1.07698
Sorafenib	C16	3.7e-07	83740	1.25077
Sorafenib	C15	1.11e-06	93817	1.40128
Sorafenib	C14	3.33e-06	68587	1.02444
Sorafenib	C13	1e-05	76751	1.14638
Sunitinib	I24	4.12e-08	72685	1.08564
Sunitinib	I23	1.23e-07	73251	1.0941
Sunitinib	I22	3.7e-07	72869	1.08839
Sunitinib	I21	1.11e-06	71088	1.06179
Sunitinib	I20	3.33e-06	70062	1.04647
Sunitinib	I19	1e-05	71964	1.07488
Tamoxifen	I18	4.12e-08	65504	0.978387
Tamoxifen	I17	1.23e-07	58489	0.873609
Tamoxifen	I16	3.7e-07	66606	0.994847
Tamoxifen	I15	1.11e-06	69473	1.03767
Tamoxifen	I14	3.33e-06	62677	0.936162
Tamoxifen	I13	1e-05	64840	0.968469
Taselisib	F24	4.12e-08	73671	1.10037
Taselisib	F23	1.23e-07	77704	1.16061
Taselisib	F22	3.7e-07	80284	1.19915
Taselisib	F21	1.11e-06	80080	1.1961
Taselisib	F20	3.33e-06	78910	1.17862
Taselisib	F19	1e-05	98343	1.46888
Teniposide	D18	4.12e-08	74799	1.11722
Teniposide	D17	1.23e-07	105000	1.56831
Teniposide	D16	3.7e-07	104445	1.56002
Teniposide	D15	1.11e-06	113272	1.69186
Teniposide	D14	3.33e-06	102244	1.52715
Teniposide	D13	1e-05	109921	1.64181
Trametinib	F18	4.12e-08	56799	0.848367
Trametinib	F17	1.23e-07	52659	0.78653
Trametinib	F16	3.7e-07	57007	0.851473
Trametinib	F15	1.11e-06	57049	0.852101
Trametinib	F14	3.33e-06	64145	0.958089
Trametinib	F13	1e-05	48480	0.724112
Vandetanib	M24	4.12e-08	75651	1.12995
Vandetanib	M23	1.23e-07	57473	0.858434
Vandetanib	M22	3.7e-07	62574	0.934624
Vandetanib	M21	1.11e-06	62479	0.933205
Vandetanib	M20	3.33e-06	55603	0.830503
Vandetanib	M19	1e-05	44843	0.669788
Veliparib	O18	4.12e-08	72776	1.087
Veliparib	O17	1.23e-07	64816	0.968111
Veliparib	O16	3.7e-07	71915	1.07414
Veliparib	O15	1.11e-06	79229	1.18339
Veliparib	O14	3.33e-06	78180	1.16772
Veliparib	O13	1e-05	73199	1.09332
Vemurafenib	J06	4.12e-08	63557	0.949306
Vemurafenib	J05	1.23e-07	66438	0.992338
Vemurafenib	J04	3.7e-07	83444	1.24634
Vemurafenib	J03	1.11e-06	83739	1.25075
Vemurafenib	J02	3.33e-06	117738	1.75857
Vemurafenib	J01	1e-05	121877	1.82039
Vismodegib	J24	4.12e-08	88032	1.31487
Vismodegib	J23	1.23e-07	76846	1.14779
Vismodegib	J22	3.7e-07	73913	1.10399
Vismodegib	J21	1.11e-06	67838	1.01325
Vismodegib	J20	3.33e-06	68092	1.01704
Vismodegib	J19	1e-05	64695	0.966304
Vorinostat	H12	4.12e-08	69547	1.03877
Vorinostat	H11	1.23e-07	67040	1.00133
Vorinostat	H10	3.7e-07	62470	0.93307
Vorinostat	H09	1.11e-06	65460	0.97773
Vorinostat	H08	3.33e-06	87662	1.30935
Vorinostat	H07	1e-05	84932	1.26857
Allopurinol	C18	4.88e-09	60764	1.00185
Allopurinol	C17	1.95e-08	63201	1.04203
Allopurinol	C16	7.81e-08	64480	1.06311
Allopurinol	C15	3.13e-07	66901	1.10303
Allopurinol	C14	1.25e-06	67314	1.10984
Allopurinol	C13	5e-06	82886	1.36658
Altretamine	F24	4.88e-09	83207	1.37188
Altretamine	F23	1.95e-08	67657	1.11549
Altretamine	F22	7.81e-08	66743	1.10043
Altretamine	F21	3.13e-07	68280	1.12577
Altretamine	F20	1.25e-06	61637	1.01624
Altretamine	F19	5e-06	64760	1.06773
Bleomycin	G24	4.88e-09	79278	1.3071
Bleomycin	G23	1.95e-08	68868	1.13546
Bleomycin	G22	7.81e-08	62113	1.02409
Bleomycin	G21	3.13e-07	60764	1.00185
Bleomycin	G20	1.25e-06	65713	1.08344
Bleomycin	G19	5e-06	59629	0.983133
Busulfan	C06	4.88e-09	107918	1.7793
Busulfan	C05	1.95e-08	78858	1.30017
Busulfan	C04	7.81e-08	73428	1.21064
Busulfan	C03	3.13e-07	113272	1.86757
Busulfan	C02	1.25e-06	123576	2.03746
Busulfan	C01	5e-06	90394	1.49037
Cabazitaxel	F12	4.88e-09	76584	1.26268
Cabazitaxel	F11	1.95e-08	101486	1.67325
Cabazitaxel	F10	7.81e-08	99134	1.63447
Cabazitaxel	F09	3.13e-07	94748	1.56216
Cabazitaxel	F08	1.25e-06	106471	1.75544
Cabazitaxel	F07	5e-06	108824	1.79424
Carfilzomib	K12	4.88e-09	60815	1.00269
Carfilzomib	K11	1.95e-08	59769	0.985442
Carfilzomib	K10	7.81e-08	40200	0.662798
Carfilzomib	K09	3.13e-07	3281	0.0540955
Carfilzomib	K08	1.25e-06	970	0.0159929
Carfilzomib	K07	5e-06	1290	0.0212689
Cisplatin	E24	1.46e-09	71306	1.20537
Cisplatin	E23	5.86e-09	69095	1.16799
Cisplatin	E22	2.34e-08	72989	1.23382
Cisplatin	E21	9.38e-08	65088	1.10026
Cisplatin	E20	3.75e-07	58851	0.994827
Cisplatin	E19	1.5e-06	70169	1.18615
Cyclophosphamide	D06	4.88e-09	94730	1.56186
Cyclophosphamide	D05	1.95e-08	60880	1.00376
Cyclophosphamide	D04	7.81e-08	142324	2.34657
Cyclophosphamide	D03	3.13e-07	123473	2.03576
Cyclophosphamide	D02	1.25e-06	139471	2.29953
Cyclophosphamide	D01	5e-06	112542	1.85554
Cytarabine	E18	4.88e-09	60516	0.997758
Cytarabine	E17	1.95e-08	63350	1.04448
Cytarabine	E16	7.81e-08	63681	1.04994
Cytarabine	E15	3.13e-07	85280	1.40605
Cytarabine	E14	1.25e-06	104547	1.72372
Cytarabine	E13	5e-06	74634	1.23053
Daunorubicin	H18	4.88e-09	60932	1.00462
Daunorubicin	H17	1.95e-08	60814	1.00267
Daunorubicin	H16	7.81e-08	77261	1.27384
Daunorubicin	H15	3.13e-07	76868	1.26736
Daunorubicin	H14	1.25e-06	6547	0.107944
Daunorubicin	H13	5e-06	918	0.0151355
Docetaxel	G12	4.88e-09	88845	1.46483
Docetaxel	G11	1.95e-08	95650	1.57703
Docetaxel	G10	7.81e-08	81200	1.33879
Docetaxel	G09	3.13e-07	89474	1.4752
Docetaxel	G08	1.25e-06	95433	1.57345
Docetaxel	G07	5e-06	93863	1.54757
Doxorubicin	C12	4.88e-09	65018	1.07198
Doxorubicin	C11	1.95e-08	72523	1.19572
Doxorubicin	C10	7.81e-08	90476	1.49172
Doxorubicin	C09	3.13e-07	92374	1.52302
Doxorubicin	C08	1.25e-06	64861	1.0694
Doxorubicin	C07	5e-06	1304	0.0214997
Epirubicin	D12	4.88e-09	67052	1.10552
Epirubicin	D11	1.95e-08	65711	1.08341
Epirubicin	D10	7.81e-08	82369	1.35806
Epirubicin	D09	3.13e-07	99150	1.63474
Epirubicin	D08	1.25e-06	1146	0.0188947
Epirubicin	D07	5e-06	2593	0.0427521
Ethinyl estradiol	E12	4.88e-09	72560	1.19633
Ethinyl estradiol	E11	1.95e-08	61658	1.01659
Ethinyl estradiol	E10	7.81e-08	62488	1.03027
Ethinyl estradiol	E09	3.13e-07	63331	1.04417
Ethinyl estradiol	E08	1.25e-06	62493	1.03035
Ethinyl estradiol	E07	5e-06	75464	1.24421
Etoposide	I18	4.88e-09	65099	1.07332
Etoposide	I17	1.95e-08	60175	0.992135
Etoposide	I16	7.81e-08	62221	1.02587
Etoposide	I15	3.13e-07	74062	1.2211
Etoposide	I14	1.25e-06	88063	1.45194
Etoposide	I13	5e-06	96403	1.58944
Fluorouracil	I06	4.88e-09	110010	1.81379
Fluorouracil	I05	1.95e-08	68876	1.13559
Fluorouracil	I04	7.81e-08	77950	1.2852
Fluorouracil	I03	3.13e-07	98009	1.61592
Fluorouracil	I02	1.25e-06	138477	2.28314
Fluorouracil	I01	5e-06	177237	2.9222
Gemcitabine	J06	4.88e-09	65049	1.0725
Gemcitabine	J05	1.95e-08	52096	0.858933
Gemcitabine	J04	7.81e-08	52710	0.869056
Gemcitabine	J03	3.13e-07	58963	0.972153
Gemcitabine	J02	1.25e-06	56314	0.928477
Gemcitabine	J01	5e-06	58398	0.962837
Hydroxyurea	K18	4.88e-09	57284	0.94447
Hydroxyurea	K17	1.95e-08	61467	1.01344
Hydroxyurea	K16	7.81e-08	63477	1.04658
Hydroxyurea	K15	3.13e-07	68052	1.12201
Hydroxyurea	K14	1.25e-06	61132	1.00791
Hydroxyurea	K13	5e-06	62918	1.03736
Idarubicin	G18	4.88e-09	60290	0.994032
Idarubicin	G17	1.95e-08	89464	1.47504
Idarubicin	G16	7.81e-08	88655	1.4617
Idarubicin	G15	3.13e-07	24247	0.399772
Idarubicin	G14	1.25e-06	2129	0.0351019
Idarubicin	G13	5e-06	1399	0.023066
Ixabepilone	H12	4.88e-09	66841	1.10204
Ixabepilone	H11	1.95e-08	109167	1.79989
Ixabepilone	H10	7.81e-08	107735	1.77628
Ixabepilone	H09	3.13e-07	92788	1.52984
Ixabepilone	H08	1.25e-06	93163	1.53603
Ixabepilone	H07	5e-06	92340	1.52246
Methotrexate	H06	4.88e-09	67246	1.10872
Methotrexate	H05	1.95e-08	75173	1.23942
Methotrexate	H04	7.81e-08	118647	1.95619
Methotrexate	H03	3.13e-07	121866	2.00927
Methotrexate	H02	1.25e-06	115598	1.90592
Methotrexate	H01	5e-06	105144	1.73356
Mitomycin	D24	4.88e-09	83740	1.38066
Mitomycin	D23	1.95e-08	71603	1.18055
Mitomycin	D22	7.81e-08	76385	1.2594
Mitomycin	D21	3.13e-07	104144	1.71707
Mitomycin	D20	1.25e-06	101394	1.67173
Mitomycin	D19	5e-06	27843	0.459062
Paclitaxel	J18	4.88e-09	65419	1.0786
Paclitaxel	J17	1.95e-08	65426	1.07871
Paclitaxel	J16	7.81e-08	79062	1.30353
Paclitaxel	J15	3.13e-07	97748	1.61162
Paclitaxel	J14	1.25e-06	100327	1.65414
Paclitaxel	J13	5e-06	84872	1.39933
Pemetrexed	F06	4.88e-09	98616	1.66702
Pemetrexed	F05	1.95e-08	135382	2.28852
Pemetrexed	F04	7.81e-08	128260	2.16813
Pemetrexed	F03	3.13e-07	123680	2.09071
Pemetrexed	F02	1.25e-06	130026	2.19798
Pemetrexed	F01	5e-06	128756	2.17651
Pentostatin	D18	4.88e-09	66668	1.09919
Pentostatin	D17	1.95e-08	70389	1.16054
Pentostatin	D16	7.81e-08	67892	1.11937
Pentostatin	D15	3.13e-07	52901	0.872205
Pentostatin	D14	1.25e-06	53166	0.876575
Pentostatin	D13	5e-06	64130	1.05734
Pralatrexate	G06	4.88e-09	113533	1.87188
Pralatrexate	G05	1.95e-08	104552	1.7238
Pralatrexate	G04	7.81e-08	102060	1.68271
Pralatrexate	G03	3.13e-07	102891	1.69642
Pralatrexate	G02	1.25e-06	111247	1.83419
Pralatrexate	G01	5e-06	114908	1.89455
SN-38	H24	4.88e-09	102894	1.69647
SN-38	H23	1.95e-08	100583	1.65836
SN-38	H22	7.81e-08	96920	1.59797
SN-38	H21	3.13e-07	103802	1.71144
SN-38	H20	1.25e-06	102249	1.68583
SN-38	H19	5e-06	90344	1.48955
Temozolomide	E06	4.88e-09	77398	1.2761
Temozolomide	E05	1.95e-08	69548	1.14667
Temozolomide	E04	7.81e-08	97482	1.60723
Temozolomide	E03	3.13e-07	126023	2.0778
Temozolomide	E02	1.25e-06	122022	2.01184
Temozolomide	E01	5e-06	128568	2.11977
Topotecan	F18	4.88e-09	73021	1.20393
Topotecan	F17	1.95e-08	89386	1.47375
Topotecan	F16	7.81e-08	87617	1.44459
Topotecan	F15	3.13e-07	103841	1.71208
Topotecan	F14	1.25e-06	111811	1.84348
Topotecan	F13	5e-06	95180	1.56928
Vinblastine	J12	4.88e-09	71783	1.18352
Vinblastine	J11	1.95e-08	98262	1.62009
Vinblastine	J10	7.81e-08	107869	1.77849
Vinblastine	J09	3.13e-07	120902	1.99337
Vinblastine	J08	1.25e-06	109929	1.81245
Vinblastine	J07	5e-06	97143	1.60165
Vincristine	K06	4.88e-09	106324	1.75302
Vincristine	K05	1.95e-08	105212	1.73468
Vincristine	K04	7.81e-08	113742	1.87532
Vincristine	K03	3.13e-07	102690	1.6931
Vincristine	K02	1.25e-06	95779	1.57916
Vincristine	K01	5e-06	99182	1.63526
Vinorelbine	I12	4.88e-09	68042	1.12184
Vinorelbine	I11	1.95e-08	105025	1.7316
Vinorelbine	I10	7.81e-08	111373	1.83626
Vinorelbine	I09	3.13e-07	122095	2.01304
Vinorelbine	I08	1.25e-06	108288	1.7854
Vinorelbine	I07	5e-06	75848	1.25054
Abemaciclib	H06	4.12e-08	67025	1.13849
Abemaciclib	H05	1.23e-07	64097	1.08875
Abemaciclib	H04	3.7e-07	73272	1.2446
Abemaciclib	H03	1.11e-06	70563	1.19858
Abemaciclib	H02	3.33e-06	72411	1.22997
Abemaciclib	H01	1e-05	81755	1.38869
Afatinib	J24	4.12e-08	66135	1.12337
Afatinib	J23	1.23e-07	67646	1.14904
Afatinib	J22	3.7e-07	69846	1.1864
Afatinib	J21	1.11e-06	61231	1.04007
Afatinib	J20	3.33e-06	55507	0.942842
Afatinib	J19	1e-05	47115	0.800296
Afuresertib	B06	4.12e-08	59279	1.00691
Afuresertib	B05	1.23e-07	77585	1.31786
Afuresertib	B04	3.7e-07	79642	1.3528
Afuresertib	B03	1.11e-06	87889	1.49288
Afuresertib	B02	3.33e-06	112128	1.90461
Afuresertib	B01	1e-05	87127	1.47994
Alisertib	C06	4.12e-08	76607	1.30125
Alisertib	C05	1.23e-07	107935	1.83338
Alisertib	C04	3.7e-07	115076	1.95468
Alisertib	C03	1.11e-06	123742	2.10188
Alisertib	C02	3.33e-06	126813	2.15405
Alisertib	C01	1e-05	112981	1.9191
Apitolisib	J18	4.12e-08	69219	1.17575
Apitolisib	J17	1.23e-07	65630	1.11479
Apitolisib	J16	3.7e-07	79769	1.35496
Apitolisib	J15	1.11e-06	132640	2.25302
Apitolisib	J14	3.33e-06	93922	1.59536
Apitolisib	J13	1e-05	61346	1.04202
AT7519	G06	4.12e-08	61320	1.04158
AT7519	G05	1.23e-07	63676	1.0816
AT7519	G04	3.7e-07	55878	0.949144
AT7519	G03	1.11e-06	64122	1.08918
AT7519	G02	3.33e-06	86007	1.46092
AT7519	G01	1e-05	2554	0.0433823
AZD5363	B24	4.12e-08	73450	1.24762
AZD5363	B23	1.23e-07	73635	1.25076
AZD5363	B22	3.7e-07	81839	1.39012
AZD5363	B21	1.11e-06	96468	1.63861
AZD5363	B20	3.33e-06	103457	1.75732
AZD5363	B19	1e-05	105577	1.79333
Binimetinib	D18	4.12e-08	66717	1.13326
Binimetinib	D17	1.23e-07	60168	1.02201
Binimetinib	D16	3.7e-07	65901	1.11939
Binimetinib	D15	1.11e-06	56308	0.956448
Binimetinib	D14	3.33e-06	51016	0.866558
Binimetinib	D13	1e-05	52428	0.890542
BML-EI388	J06	4.12e-08	62783	1.06643
BML-EI388	J05	1.23e-07	66732	1.13351
BML-EI388	J04	3.7e-07	57753	0.980993
BML-EI388	J03	1.11e-06	71829	1.22009
BML-EI388	J02	3.33e-06	70698	1.20088
BML-EI388	J01	1e-05	80417	1.36596
Capmatinib	C12	1.99e-08	60374	1.02551
Capmatinib	C11	5.98e-08	71018	1.20631
Capmatinib	C10	1.79e-07	64491	1.09544
Capmatinib	C09	5.38e-07	65138	1.10643
Capmatinib	C08	1.61e-06	64882	1.10209
Capmatinib	C07	4.84e-06	72866	1.2377
CPI-203	F06	4.12e-08	121240	2.05938
CPI-203	F05	1.23e-07	119064	2.02242
CPI-203	F04	3.7e-07	134546	2.2854
CPI-203	F03	1.11e-06	134061	2.27716
CPI-203	F02	3.33e-06	127923	2.1729
CPI-203	F01	1e-05	102657	1.74373
Defactinib	H12	4.03e-08	61192	1.03941
Defactinib	H11	1.21e-07	63203	1.07357
Defactinib	H10	3.63e-07	64791	1.10054
Defactinib	H09	1.09e-06	64039	1.08777
Defactinib	H08	3.26e-06	67438	1.1455
Defactinib	H07	9.79e-06	62123	1.05522
Duvelisib	K18	4.12e-08	59502	1.0107
Duvelisib	K17	1.23e-07	60064	1.02025
Duvelisib	K16	3.7e-07	62100	1.05483
Duvelisib	K15	1.11e-06	50399	0.856078
Duvelisib	K14	3.33e-06	53813	0.914068
Duvelisib	K13	1e-05	63342	1.07593
Entinostat	J12	4.12e-08	70651	1.20008
Entinostat	J11	1.23e-07	68584	1.16497
Entinostat	J10	3.7e-07	67008	1.1382
Entinostat	J09	1.11e-06	79884	1.35691
Entinostat	J08	3.33e-06	88705	1.50674
Entinostat	J07	1e-05	9972	0.169384
Erdafitinib	I12	4.12e-08	61760	1.04906
Erdafitinib	I11	1.23e-07	64417	1.09419
Erdafitinib	I10	3.7e-07	60271	1.02376
Erdafitinib	I09	1.11e-06	67140	1.14044
Erdafitinib	I08	3.33e-06	75694	1.28574
Erdafitinib	I07	1e-05	85736	1.45631
GDC0994	E12	4.12e-08	53636	0.911061
GDC0994	E11	1.23e-07	49990	0.84913
GDC0994	E10	3.7e-07	55733	0.946681
GDC0994	E09	1.11e-06	50145	0.851763
GDC0994	E08	3.33e-06	57628	0.978869
GDC0994	E07	1e-05	61704	1.0481
GF-109203	C24	4.12e-08	84086	1.42829
GF-109203	C23	1.23e-07	64089	1.08862
GF-109203	C22	3.7e-07	69386	1.17859
GF-109203	C21	1.11e-06	76051	1.2918
GF-109203	C20	3.33e-06	69559	1.18153
GF-109203	C19	1e-05	74633	1.26772
GSK2636771	I18	4.12e-08	59883	1.01717
GSK2636771	I17	1.23e-07	55853	0.948719
GSK2636771	I16	3.7e-07	67162	1.14081
GSK2636771	I15	1.11e-06	70950	1.20516
GSK2636771	I14	3.33e-06	61651	1.0472
GSK2636771	I13	1e-05	66300	1.12617
GSK503	G12	4.12e-08	60912	1.03465
GSK503	G11	1.23e-07	66027	1.12153
GSK503	G10	3.7e-07	61222	1.03992
GSK503	G09	1.11e-06	62028	1.05361
GSK503	G08	3.33e-06	66400	1.12787
GSK503	G07	1e-05	69932	1.18787
Imiquimod	G24	4.12e-08	72818	1.23689
Imiquimod	G23	1.23e-07	66824	1.13507
Imiquimod	G22	3.7e-07	66671	1.13247
Imiquimod	G21	1.11e-06	64422	1.09427
Imiquimod	G20	3.33e-06	73503	1.24852
Imiquimod	G19	1e-05	58371	0.99149
Linsitinib	B18	4.12e-08	74746	1.26964
Linsitinib	B17	1.23e-07	66805	1.13475
Linsitinib	B16	3.7e-07	60627	1.02981
Linsitinib	B15	1.11e-06	68472	1.16307
Linsitinib	B14	3.33e-06	63892	1.08527
Linsitinib	B13	1e-05	14966	0.254213
Midostaurin	D24	4.12e-08	68241	1.15914
Midostaurin	D23	1.23e-07	66282	1.12587
Midostaurin	D22	3.7e-07	58005	0.985273
Midostaurin	D21	1.11e-06	63933	1.08597
Midostaurin	D20	3.33e-06	72841	1.23728
Midostaurin	D19	1e-05	103489	1.75786
Momelotinib	C18	4.12e-08	61687	1.04782
Momelotinib	C17	1.23e-07	60503	1.0277
Momelotinib	C16	3.7e-07	60875	1.03402
Momelotinib	C15	1.11e-06	71869	1.22077
Momelotinib	C14	3.33e-06	64932	1.10294
Momelotinib	C13	1e-05	73266	1.2445
Nilotinib	H24	4.12e-08	80200	1.36228
Nilotinib	H23	1.23e-07	66835	1.13526
Nilotinib	H22	3.7e-07	61124	1.03825
Nilotinib	H21	1.11e-06	67652	1.14914
Nilotinib	H20	3.33e-06	61419	1.04326
Nilotinib	H19	1e-05	67907	1.15347
Onalespib	K12	4.12e-08	62986	1.06988
Onalespib	K11	1.23e-07	74134	1.25924
Onalespib	K10	3.7e-07	64462	1.09495
Onalespib	K09	1.11e-06	7406	0.125798
Onalespib	K08	3.33e-06	1204	0.0204511
Onalespib	K07	1e-05	1562	0.0265321
Oprozomib	E24	4.12e-08	26446	0.449212
Oprozomib	E23	1.23e-07	13917	0.236394
Oprozomib	E22	3.7e-07	2890	0.0490896
Oprozomib	E21	1.11e-06	790	0.0134189
Oprozomib	E20	3.33e-06	739	0.0125527
Oprozomib	E19	1e-05	1195	0.0202983
Pictilisib	G18	4.12e-08	61290	1.04107
Pictilisib	G17	1.23e-07	61814	1.04997
Pictilisib	G16	3.7e-07	56643	0.962138
Pictilisib	G15	1.11e-06	56063	0.952286
Pictilisib	G14	3.33e-06	64007	1.08722
Pictilisib	G13	1e-05	69961	1.18836
Pinometostat	D12	4.12e-08	63099	1.0718
Pinometostat	D11	1.23e-07	56690	0.962937
Pinometostat	D10	3.7e-07	73996	1.2569
Pinometostat	D09	1.11e-06	66379	1.12751
Pinometostat	D08	3.33e-06	67106	1.13986
Pinometostat	D07	1e-05	63437	1.07754
Regorafenib	I24	4.12e-08	68373	1.16138
Regorafenib	I23	1.23e-07	68586	1.165
Regorafenib	I22	3.7e-07	61487	1.04442
Regorafenib	I21	1.11e-06	56770	0.964295
Regorafenib	I20	3.33e-06	66667	1.13241
Regorafenib	I19	1e-05	56346	0.957093
Ribociclib	I06	4.12e-08	67249	1.14229
Ribociclib	I05	1.23e-07	68600	1.16524
Ribociclib	I04	3.7e-07	65188	1.10728
Ribociclib	I03	1.11e-06	71676	1.21749
Ribociclib	I02	3.33e-06	67384	1.14458
Ribociclib	I01	1e-05	84176	1.42981
Sepantronium	E06	4.12e-08	61013	1.03637
Sepantronium	E05	1.23e-07	73301	1.24509
Sepantronium	E04	3.7e-07	92622	1.57328
Sepantronium	E03	1.11e-06	104127	1.7687
Sepantronium	E02	3.33e-06	43415	0.737447
Sepantronium	E01	1e-05	2858	0.048546
Talazoparib	H18	4.12e-08	71774	1.21915
Talazoparib	H17	1.23e-07	70395	1.19573
Talazoparib	H16	3.7e-07	71451	1.21367
Talazoparib	H15	1.11e-06	82096	1.39448
Talazoparib	H14	3.33e-06	82957	1.40911
Talazoparib	H13	1e-05	80926	1.37461
Tazemetostat	F12	4.12e-08	56109	0.953068
Tazemetostat	F11	1.23e-07	59200	1.00557
Tazemetostat	F10	3.7e-07	69139	1.1744
Tazemetostat	F09	1.11e-06	70439	1.19648
Tazemetostat	F08	3.33e-06	68475	1.16312
Tazemetostat	F07	1e-05	70892	1.20417
Temsirolimus	E18	4.12e-08	64197	1.09045
Temsirolimus	E17	1.23e-07	81045	1.37663
Temsirolimus	E16	3.7e-07	81670	1.38725
Temsirolimus	E15	1.11e-06	79646	1.35287
Temsirolimus	E14	3.33e-06	85882	1.45879
Temsirolimus	E13	1e-05	79437	1.34932
Toremifene	F18	4.12e-08	60491	1.0275
Toremifene	F17	1.23e-07	64888	1.10219
Toremifene	F16	3.7e-07	60464	1.02704
Toremifene	F15	1.11e-06	60374	1.02551
Toremifene	F14	3.33e-06	60968	1.0356
Toremifene	F13	1e-05	64012	1.08731
Tretinoin	F24	4.12e-08	65842	1.11839
Tretinoin	F23	1.23e-07	65184	1.10722
Tretinoin	F22	3.7e-07	64665	1.0984
Tretinoin	F21	1.11e-06	64124	1.08921
Tretinoin	F20	3.33e-06	58392	0.991847
Tretinoin	F19	1e-05	64674	1.09855
Venetoclax	D06	4.12e-08	64430	1.09441
Venetoclax	D05	1.23e-07	63366	1.07634
Venetoclax	D04	3.7e-07	67678	1.14958
Venetoclax	D03	1.11e-06	62739	1.06568
Venetoclax	D02	3.33e-06	103793	1.76303
Venetoclax	D01	1e-05	126809	2.15398

## Sheet: FLC C14 single stats
Drug	Type	Status	Target_Full	Cmax	inhibitionCmax	norm.AUC	Z.score
Oprozomib	Chemotherapy	Phase II	Proteasome	2.40326e-07	90.5992	0.107626	-0.168109
Pentostatin	Chemotherapy	Approved	purine analog	4.65204e-07	8.89919	1.00449	0.0805732
Hydroxyurea	Chemotherapy	Approved	ribonucleotide reductase inhibitor	0.00037999	-4.63531	1.02637	0.306546
Carfilzomib	Chemotherapy	Approved	20S proteasome inhibitor	2.88508e-06	98.2384	0.443139	0.471063
Allopurinol	Chemotherapy	Approved	xanthine oxidase inhibitor	9.11014e-06	-36.6122	1.08626	0.744406
Ethinyl estradiol	Chemotherapy	Approved	estrogen hormone	4.35623e-10	-4.41816	1.04734	0.806573
Altretamine	Chemotherapy	Approved	alkylating antineoplastic agent	9.89157e-05	-7.40145	1.10361	0.913052
Bleomycin	Chemotherapy	Approved	inhibition of DNA synthesis	2.24648e-07	-1.37565	1.06626	1.33566
Gemcitabine	Chemotherapy	Approved	antimetabolite - pyrimidine antagonist	3.20002e-06	6.03079	0.94173	2.15988
Cisplatin	Chemotherapy	Approved	platinum alkylating agent, inhibits DNA replication	8.39972e-06	-9.04733	1.15319	2.44154
Idarubicin	Chemotherapy	Approved	topoisomerase II inhibitor	2.77177e-08	-37.3183	0.811146	2.6512
Mitomycin	Chemotherapy	Approved	antitumor antibiotic	2.11769e-06	-17.0486	1.25937	2.49493
Etoposide	Chemotherapy	Approved	topoisomerase II inhibitor	3.39814e-05	-58.7616	1.20365	2.85122
Epirubicin	Chemotherapy	Approved	topoisomerase II inhibitor	1.71098e-05	96.9177	0.894846	3.05614
Cytarabine	Chemotherapy	Approved	antimetabolite, inhibits DNA synthesis	0.000164462	-47.1472	1.23485	3.0136
Doxorubicin	Chemotherapy	Approved	topoisomerase II inhibitor	6.85643e-07	-32.027	1.09774	3.18271
Daunorubicin	Chemotherapy	Approved	DNA intercalating agent, anthracycline antitumor antibiotic	3.46906e-07	-13.7025	0.870944	3.18873
Paclitaxel	Chemotherapy	Approved	microtubule inhibitor, taxane	6.90942e-06	-58.4126	1.37775	3.28168
Pralatrexate	Chemotherapy	Approved	antifolate	2.24788e-05	-89.4531	1.75678	3.21065
Teniposide	Chemotherapy	Approved	topoisomerase II inhibitor	6.09149e-05	-60.7867	1.56492	3.28169
Methotrexate	Chemotherapy	Approved	folic acid antagonist	2.29999e-06	-91.4216	1.73172	3.56612
Topotecan	Chemotherapy	Approved	topoisomerase I inhibitor	1.56102e-07	-63.1982	1.57132	3.57734
Busulfan	Chemotherapy	Approved	alkylating antineoplastic agent	1.46161e-05	-84.3752	1.59718	3.74001
Ixabepilone	Chemotherapy	Approved	microtubule inhibitor	1.25001e-05	-54.9551	1.53502	3.99741
Docetaxel	Chemotherapy	Approved	microtubule inhibitor	4.36947e-06	-56.0502	1.4976	4.17146
Temozolomide	Chemotherapy	Approved	alkylating agent	7.15938e-05	-107.589	1.72412	4.09006
Cyclophosphamide	Chemotherapy	Approved	alkylating agent, inhibits DNA replication and RNA synthesis	0.000132523	-113.952	1.88172	4.21877
SN-38	Chemotherapy	Approved	topoisomerase, active metabolite of irinotecan	#N/A	#N/A	1.63355	4.22645
Cabazitaxel	Chemotherapy	Approved	microtubule inhibitor, taxane	6.40006e-07	-69.3997	1.61045	4.38138
Pemetrexed	Chemotherapy	Approved	antifolate	0.000256696	-117.981	2.16223	4.36515
Vinorelbine	Chemotherapy	Approved	microtubule inhibitor	1.2047e-07	-78.3411	1.72296	4.93311
Fluorouracil	Chemotherapy	Approved	antimetabolite - thymidylate synthase inhibitor	0.000425901	-192.203	1.74271	4.9977
Vinblastine	Chemotherapy	Approved	microtubule inhibitor	2.4058e-07	-80.1936	1.70387	5.00254
Vincristine	Chemotherapy	Approved	microtubule inhibitor	2.36935e-07	-76.546	1.70297	5.04416
Tamoxifen	Targeted	Approved	selective estrogen receptor modulator	7.7532e-08	2.93505	0.968147	-0.550402
Lapatinib	Targeted	Approved	EGFR, HER2	4.04435e-06	3.74876	0.958024	-0.44126
Idelalisib	Targeted	Approved	PI3K P110δ	7.54412e-06	9.71008	0.985793	0.00400512
GDC0994	Targeted	Phase I	ERK1, ERK2	#N/A	#N/A	0.919535	0.145385
Cediranib	Targeted	Phase III	VEGFR	4.08431e-07	1.86706	0.995664	0.012506
Olaparib	Targeted	Approved	PARP	3.2684e-05	-23.8623	0.979921	0.0558947
Vandetanib	Targeted	Approved	VEGFR2, EGFR, RET	4.56087e-06	21.5439	0.907833	0.251594
Pazopanib	Targeted	Approved	c-KIT, FGFR, PDGFR, VEGFR	1.22368e-07	-3.06744	1.03873	-0.0971107
Trametinib	Targeted	Approved	MEK1, MEK2	3.60744e-08	15.2226	0.839951	0.558642
Cobimetinib	Targeted	Approved	MEK	5.13834e-07	9.71715	0.749765	0.589222
Ruxolitinib	Targeted	Approved	JAK1, JAK2	9.33527e-07	-2.25367	1.04342	0.268254
AZD6482	Targeted	Phase I	PI3Kβ	#N/A	#N/A	1.0078	0.605537
Rucaparib	Targeted	Approved	PARP1, PARP2, PARP3	1.69926e-06	0.343525	1.04104	0.327996
Duvelisib	Targeted	Phase III	PI3Kδ, PI3Kγ	2.18297e-06	7.22168	0.973513	0.663033
Quizartinib	Targeted	Phase III	FLT3	3.74554e-06	6.64853	0.991309	0.693154
Megestrol	Targeted	Approved	Progesterone receptor agonist	1.95834e-06	-9.95734	1.07238	0.540163
MK2206	Targeted	Phase II	Akt1, Akt2, Akt3	4.66038e-07	0.770157	1.03868	0.65178
Fulvestrant	Targeted	Approved	selective estrogen receptor degrader	2.07657e-08	-5.04155	1.006	0.702455
Vismodegib	Targeted	Approved	SMO receptor antagonist	3.09046e-05	2.46669	1.07741	0.652456
Dovitinib	Targeted	Phase III	FGFR1, FGFR3, c-KIT, VEGF, PDGFR, CSFR1	5.58061e-07	-2.48809	1.0255	0.724196
AZD4547	Targeted	Phase III	FGFR 1, FGFR2, FGFR3, &lt;FGFR4, &lt;KDR, &lt;MARKs, &lt;IGF1R	#N/A	#N/A	1.01691	0.753385
Sunitinib	Targeted	Approved	VEGFR, PDGFR, c-KIT, RET, CD114, CD135	7.02681e-08	-8.98376	1.07335	0.696377
Regorafenib	Targeted	Approved	VEGFR2, TIE2,	8.07762e-06	0.477296	1.05762	0.713804
Toremifene	Targeted	Approved	Nonsteroidal antiestrogen	1.50481e-06	-3.44619	1.03556	0.755064
Enzalutamide	Targeted	Approved	Androgen receptor antagonist	3.5742e-05	-22.7371	0.997818	0.931418
Veliparib	Targeted	Phase III	PARP1, PARP2	1.10003e-05	-15.835	1.10301	0.704211
Celecoxib	Targeted	Phase III	cox-2, cadherin-11	2.11342e-06	-1.9361	1.0386	0.883215
Onalespib	Targeted	Phase II	Hsp90	2.84234e-06	97.5178	0.602808	1.11123
Erlotinib	Targeted	Approved	EGFR, ALK, JAK2 mutant (JAK2V617F)	5.36873e-06	-7.32044	0.967453	1.08894
Poziotinib	Targeted	Phase II	EGFR, HER2, HER4	1.72242e-07	-2.07876	1.02233	0.985149
Lucitanib	Targeted	Phase II	FGFR1, FGFR2, FGFR3, VEGF1, VEGF2, VEGF3, PDGFRα, PDGFRβ	1.03812e-06	-1.56783	1.06246	0.860101
Dasatinib	Targeted	Approved	Bcr-Abl, Src	4.16774e-07	7.40433	0.888523	1.28802
Tretinoin	Targeted	Approved	RAR agonist (retinoic acid)	2.90579e-07	-10.2983	1.08655	0.825741
Pictilisib	Targeted	Phase II	PI3Kα, PI3Kδ	2.64e-06	-0.909975	1.03638	0.9932
Capmatinib	Targeted	Phase II	cMET	1.60758e-05	-23.77	1.10472	0.797751
Cabozantinib	Targeted	Approved	c-MET, VEGFR2	7.05868e-06	-9.76255	1.07347	0.942277
Palbociclib	Targeted	Approved	CDK4, CDK6	3.07866e-07	-5.01682	1.10993	0.899721
Linsitinib	Targeted	Discontinued	IGF-1R	3.41642e-06	-8.13579	1.07787	1.06301
Neratinib	Targeted	Approved	EGFR, HER1, HER2, HER4	2.13628e-07	-7.46902	1.10111	0.987262
Alpelisib	Targeted	Phase III	PI3K p110α	4.28115e-06	0.113566	1.06897	1.18878
Binimetinib	Targeted	Approved	Mek	1.11733e-06	5.20636	1.01017	1.3591
GSK503	Targeted	Investigational	EZH2	6.34173e-05	-18.7867	1.07927	1.24804
Afatinib	Targeted	Approved	EGFR, HER2	3.85235e-07	-12.8067	1.05227	1.34113
AZD1775	Targeted	Phase II	Wee1	2.65684e-06	5.84425	1.03793	1.54827
Nilotinib	Targeted	Approved	Bcr-Abl	4.08052e-06	-10.0401	1.12388	1.23924
Ibrutinib	Targeted	Approved	BTK	8.69472e-07	-3.25454	1.10227	1.2984
Defactinib	Targeted	Phase II	FAK	1.91972e-06	-9.57239	1.0834	1.43724
BMS-754807	Targeted	Discontinued	IGF-1R, InsR	7.1e-08	7.49627	1.04989	1.69975
Imiquimod	Targeted	Approved	TLR7, immune response dampener	1.45649e-08	-21.0475	1.1201	1.42183
GSK2636771	Targeted	Phase II	PI3Kβ	1.85961e-05	-13.1794	1.08643	1.63264
Imatinib	Targeted	Approved	Bcr-Abl	6.86787e-06	-45.9781	1.23393	1.31278
Momelotinib	Targeted	Phase II	JAK1, JAK2	1.59243e-06	-20.5595	1.12214	1.54802
Navitoclax	Targeted	Discontinued	Bcl-2, Bcl-XL, Bcl-w	5.73563e-06	-8.21619	1.0856	1.69265
Axitinib	Targeted	Approved	VEGFR1, VEGFR2, VEGFR3 KIT, PDGFR	1.06089e-07	-1.54279	1.13346	1.62031
Buparlisib	Targeted	Phase III	Pan-class I PI3K	4.7028e-06	-7.74349	1.03301	2.2975
Pinometostat	Targeted	Phase I	DOT-1L	6.04219e-06	-13.959	1.10041	1.71298
Dactolisib	Targeted	Discontinued**	PI3K, mTOR	1.67995e-06	-13.3121	1.09829	1.84627
Vorinostat	Targeted	Approved	histone deacetylase	2.19998e-06	-28.2463	1.07591	2.03769
Ribociclib	Targeted	Approved	CDK4, CDK6	7.0949e-06	-16.9163	1.1547	1.70881
Sorafenib	Targeted	Approved	VEGFR, PDGFR, Raf	2.11047e-05	-14.6865	1.1966	1.71008
Osimertinib	Targeted	Approved	EGFR	1.26099e-07	-11.8735	1.12267	1.88016
Abemaciclib	Targeted	Phase III	Cdk4, Cdk6	5.88243e-07	-17.2458	1.19934	1.74883
AT7519	Targeted	Discontinued	Cdk1, Cdk2	1.54613e-06	-8.69575	1.06436	2.49721
Taselisib	Targeted	Phase III (Potentially Discontinued per Hartmut)	PIK3CA	7.64334e-08	-16.6994	1.18354	1.99421
Tazemetostat	Targeted	Phase II	EZH2	2.619e-06	-19.2468	1.12643	2.17703
BML-EI388	Targeted	Investigational	Chk2	#N/A	#N/A	1.14515	2.22506
Everolimus	Targeted	Approved	mTORC1	3.86131e-08	-2.45238	1.25198	2.1483
Erdafitinib	Targeted	Phase II	FGFR	6.02393e-06	-38.9197	1.15526	2.31067
GF-109203	Targeted	Investigational	PKCα, PKCβ1	#N/A	#N/A	1.23705	2.47148
Midostaurin	Targeted	Approved	FLT3, PKCα, PKCβ, PKCγ, Syk, Flk-1, Akt, PKA, c-Kit, FGFR, SRC, PDFRβ, VEGFR1, VEGFR2	1.40019e-06	-9.53343	1.20396	2.47639
Talazoparib	Targeted	Phase II	PARP	6.67804e-08	-20.7362	1.30905	2.41602
Venetoclax	Targeted	Approved	Bcl2	4.34112e-06	-109.496	1.31344	2.55184
Dabrafenib	Targeted	Approved	B-Raf	2.84471e-06	-9.55783	1.38907	2.57001
Vemurafenib	Targeted	Approved	BRAF	0.000126551	-82.6665	1.29216	3.05413
Temsirolimus	Targeted	Approved	mTOR inhibitor	2.71769e-06	-38.2221	1.36489	2.93439
Sepantronium	Targeted	Phase II	BIRC5	6.1917e-08	-40.669	1.13521	3.65671
Afuresertib	Targeted	Phase I	Akt	#N/A	#N/A	1.41878	3.20103
Entinostat	Targeted	Phase III	HDAC1, HDAC3	3e-07	-24.7646	1.22947	3.43585
Belinostat	Targeted	Approved	histone deacetylase	0.000182926	97.6192	1.26951	3.35476
Ponatinib	Targeted	Approved	Bcr-Abl, VEGF	1.02712e-07	-64.1553	1.62893	3.31475
AZD5363	Targeted	Phase II	Akt	4.89374e-06	-77.7919	1.51123	3.34709
NVP-BGT226	Targeted	Phase II	PI3Kα, PI3Kβ, PI3Kγ, mTORC1, mTORC2	8.00794e-09	-20.6456	1.33816	3.92613
Apitolisib	Targeted	Phase II	mTOR, PI3Kα, PI3Kβ, PI3Kδ, PI3Kγ	2.22623e-08	-14.5247	1.41413	4.14256
Alisertib	Targeted	Phase II	Aurora A kinase	1.58021e-06	-105.228	1.93425	4.1096
Rigosertib	Targeted	Phase III	Plk1, PI3K	1.26404e-05	-25.7638	1.65474	4.95571
CPI-203	Targeted	Investigational	BRD2/3/4	#N/A	#N/A	2.15496	5.89227

## Sheet: AML12 WT combo
Raw Data - combo with 10 µM Ver155008; AML12 WT
screenType	Well_Coordinate	Compound	Concentration	Compound_B	Concentration_B	Lum	normLum
Combo	B07	Neratinib	1e-05	HSP70	1e-05	26512	0.711168
Combo	B08	Neratinib	3.33e-06	HSP70	1e-05	38289	1.02708
Combo	B09	Neratinib	1.11e-06	HSP70	1e-05	36091	0.968119
Combo	B10	Neratinib	3.7e-07	HSP70	1e-05	35708	0.957845
Combo	B11	Neratinib	1.23e-07	HSP70	1e-05	38298	1.02732
Combo	B12	Neratinib	4.12e-08	HSP70	1e-05	39218	1.052
Combo	B13	Ponatinib	1e-05	HSP70	1e-05	33727	0.904706
Combo	B14	Ponatinib	3.33e-06	HSP70	1e-05	27718	0.743519
Combo	B15	Ponatinib	1.11e-06	HSP70	1e-05	31764	0.85205
Combo	B16	Ponatinib	3.7e-07	HSP70	1e-05	28802	0.772596
Combo	B17	Ponatinib	1.23e-07	HSP70	1e-05	16089	0.431578
Combo	B18	Ponatinib	4.12e-08	HSP70	1e-05	13613	0.36516
Combo	B19	NVP-BGT226	1e-05	HSP70	1e-05	11291	0.302874
Combo	B20	NVP-BGT226	3.33e-06	HSP70	1e-05	12492	0.33509
Combo	B21	NVP-BGT226	1.11e-06	HSP70	1e-05	12982	0.348234
Combo	B22	NVP-BGT226	3.7e-07	HSP70	1e-05	22174	0.594804
Combo	B23	NVP-BGT226	1.23e-07	HSP70	1e-05	32264	0.865462
Combo	B24	NVP-BGT226	4.12e-08	HSP70	1e-05	39889	1.07
Combo	C07	Fulvestrant	1e-05	HSP70	1e-05	10636	0.285304
Combo	C08	Fulvestrant	3.33e-06	HSP70	1e-05	34422	0.923349
Combo	C09	Fulvestrant	1.11e-06	HSP70	1e-05	36479	0.978527
Combo	C10	Fulvestrant	3.7e-07	HSP70	1e-05	40778	1.09385
Combo	C11	Fulvestrant	1.23e-07	HSP70	1e-05	38940	1.04454
Combo	C12	Fulvestrant	4.12e-08	HSP70	1e-05	40116	1.07609
Combo	C13	Sorafenib	1e-05	HSP70	1e-05	41842	1.12239
Combo	C14	Sorafenib	3.33e-06	HSP70	1e-05	38110	1.02228
Combo	C15	Sorafenib	1.11e-06	HSP70	1e-05	34496	0.925334
Combo	C16	Sorafenib	3.7e-07	HSP70	1e-05	42140	1.13038
Combo	C17	Sorafenib	1.23e-07	HSP70	1e-05	38732	1.03896
Combo	C18	Sorafenib	4.12e-08	HSP70	1e-05	37502	1.00597
Combo	C19	Alpelisib	1e-05	HSP70	1e-05	20775	0.557277
Combo	C20	Alpelisib	3.33e-06	HSP70	1e-05	19667	0.527555
Combo	C21	Alpelisib	1.11e-06	HSP70	1e-05	18234	0.489116
Combo	C22	Alpelisib	3.7e-07	HSP70	1e-05	27562	0.739334
Combo	C23	Alpelisib	1.23e-07	HSP70	1e-05	30582	0.820344
Combo	C24	Alpelisib	4.12e-08	HSP70	1e-05	39381	1.05637
Combo	D01	Enzalutamide	1e-05	HSP70	1e-05	24182	0.648667
Combo	D02	Enzalutamide	3.33e-06	HSP70	1e-05	25172	0.675224
Combo	D03	Enzalutamide	1.11e-06	HSP70	1e-05	27999	0.751056
Combo	D04	Enzalutamide	3.7e-07	HSP70	1e-05	37036	0.993468
Combo	D05	Enzalutamide	1.23e-07	HSP70	1e-05	34050	0.913371
Combo	D06	Enzalutamide	4.12e-08	HSP70	1e-05	38525	1.03341
Combo	D07	AZD4547	1e-05	HSP70	1e-05	32416	0.86954
Combo	D08	AZD4547	3.33e-06	HSP70	1e-05	34496	0.925334
Combo	D09	AZD4547	1.11e-06	HSP70	1e-05	34421	0.923322
Combo	D10	AZD4547	3.7e-07	HSP70	1e-05	38570	1.03462
Combo	D11	AZD4547	1.23e-07	HSP70	1e-05	40541	1.08749
Combo	D12	AZD4547	4.12e-08	HSP70	1e-05	38908	1.04368
Combo	D13	Teniposide	1e-05	HSP70	1e-05	33181	0.89006
Combo	D14	Teniposide	3.33e-06	HSP70	1e-05	32417	0.869566
Combo	D15	Teniposide	1.11e-06	HSP70	1e-05	36713	0.984804
Combo	D16	Teniposide	3.7e-07	HSP70	1e-05	34841	0.934589
Combo	D17	Teniposide	1.23e-07	HSP70	1e-05	33319	0.893762
Combo	D18	Teniposide	4.12e-08	HSP70	1e-05	38506	1.0329
Combo	D19	AZD6482	1e-05	HSP70	1e-05	25569	0.685873
Combo	D20	AZD6482	3.33e-06	HSP70	1e-05	32583	0.874019
Combo	D21	AZD6482	1.11e-06	HSP70	1e-05	38068	1.02115
Combo	D22	AZD6482	3.7e-07	HSP70	1e-05	37682	1.0108
Combo	D23	AZD6482	1.23e-07	HSP70	1e-05	39259	1.0531
Combo	D24	AZD6482	4.12e-08	HSP70	1e-05	46528	1.24809
Combo	E01	Osimertinib	1e-05	HSP70	1e-05	12892	0.34582
Combo	E02	Osimertinib	3.33e-06	HSP70	1e-05	20043	0.537641
Combo	E03	Osimertinib	1.11e-06	HSP70	1e-05	29321	0.786518
Combo	E04	Osimertinib	3.7e-07	HSP70	1e-05	35534	0.953178
Combo	E05	Osimertinib	1.23e-07	HSP70	1e-05	39501	1.05959
Combo	E06	Osimertinib	4.12e-08	HSP70	1e-05	39251	1.05288
Combo	E07	Lucitanib	1e-05	HSP70	1e-05	39683	1.06447
Combo	E08	Lucitanib	3.33e-06	HSP70	1e-05	42470	1.13923
Combo	E09	Lucitanib	1.11e-06	HSP70	1e-05	40823	1.09505
Combo	E10	Lucitanib	3.7e-07	HSP70	1e-05	43136	1.1571
Combo	E11	Lucitanib	1.23e-07	HSP70	1e-05	39737	1.06592
Combo	E12	Lucitanib	4.12e-08	HSP70	1e-05	40115	1.07606
Combo	E13	Cobimetinib	1e-05	HSP70	1e-05	5309	0.142411
Combo	E14	Cobimetinib	3.33e-06	HSP70	1e-05	12881	0.345525
Combo	E15	Cobimetinib	1.11e-06	HSP70	1e-05	14763	0.396009
Combo	E16	Cobimetinib	3.7e-07	HSP70	1e-05	19731	0.529272
Combo	E17	Cobimetinib	1.23e-07	HSP70	1e-05	25235	0.676914
Combo	E18	Cobimetinib	4.12e-08	HSP70	1e-05	29409	0.788879
Combo	E19	Idelalisib	1e-05	HSP70	1e-05	30569	0.819995
Combo	E20	Idelalisib	3.33e-06	HSP70	1e-05	31004	0.831664
Combo	E21	Idelalisib	1.11e-06	HSP70	1e-05	38058	1.02088
Combo	E22	Idelalisib	3.7e-07	HSP70	1e-05	40827	1.09516
Combo	E23	Idelalisib	1.23e-07	HSP70	1e-05	42660	1.14433
Combo	E24	Idelalisib	4.12e-08	HSP70	1e-05	43488	1.16654
Combo	F01	Navitoclax	1e-05	HSP70	1e-05	1234	0.0331013
Combo	F02	Navitoclax	3.33e-06	HSP70	1e-05	8340	0.223715
Combo	F03	Navitoclax	1.11e-06	HSP70	1e-05	24781	0.664735
Combo	F04	Navitoclax	3.7e-07	HSP70	1e-05	31681	0.849824
Combo	F05	Navitoclax	1.23e-07	HSP70	1e-05	29160	0.782199
Combo	F06	Navitoclax	4.12e-08	HSP70	1e-05	22443	0.60202
Combo	F07	Dovitinib	1e-05	HSP70	1e-05	42777	1.14747
Combo	F08	Dovitinib	3.33e-06	HSP70	1e-05	41654	1.11734
Combo	F09	Dovitinib	1.11e-06	HSP70	1e-05	40630	1.08988
Combo	F10	Dovitinib	3.7e-07	HSP70	1e-05	37611	1.00889
Combo	F11	Dovitinib	1.23e-07	HSP70	1e-05	43267	1.16061
Combo	F12	Dovitinib	4.12e-08	HSP70	1e-05	43497	1.16678
Combo	F13	Trametinib	1e-05	HSP70	1e-05	18603	0.499014
Combo	F14	Trametinib	3.33e-06	HSP70	1e-05	24489	0.656903
Combo	F15	Trametinib	1.11e-06	HSP70	1e-05	26107	0.700304
Combo	F16	Trametinib	3.7e-07	HSP70	1e-05	26564	0.712563
Combo	F17	Trametinib	1.23e-07	HSP70	1e-05	25041	0.67171
Combo	F18	Trametinib	4.12e-08	HSP70	1e-05	22989	0.616666
Combo	F19	Taselisib	1e-05	HSP70	1e-05	11089	0.297456
Combo	F20	Taselisib	3.33e-06	HSP70	1e-05	12831	0.344184
Combo	F21	Taselisib	1.11e-06	HSP70	1e-05	14140	0.379297
Combo	F22	Taselisib	3.7e-07	HSP70	1e-05	13694	0.367333
Combo	F23	Taselisib	1.23e-07	HSP70	1e-05	18485	0.495849
Combo	F24	Taselisib	4.12e-08	HSP70	1e-05	25594	0.686544
Combo	G01	Axitinib	1e-05	HSP70	1e-05	18618	0.499417
Combo	G02	Axitinib	3.33e-06	HSP70	1e-05	15681	0.420633
Combo	G03	Axitinib	1.11e-06	HSP70	1e-05	36578	0.981183
Combo	G04	Axitinib	3.7e-07	HSP70	1e-05	38155	1.02348
Combo	G05	Axitinib	1.23e-07	HSP70	1e-05	38099	1.02198
Combo	G06	Axitinib	4.12e-08	HSP70	1e-05	35719	0.958141
Combo	G07	Quizartinib	1e-05	HSP70	1e-05	33044	0.886385
Combo	G08	Quizartinib	3.33e-06	HSP70	1e-05	34798	0.933435
Combo	G09	Quizartinib	1.11e-06	HSP70	1e-05	37869	1.01581
Combo	G10	Quizartinib	3.7e-07	HSP70	1e-05	37461	1.00487
Combo	G11	Quizartinib	1.23e-07	HSP70	1e-05	34343	0.92123
Combo	G12	Quizartinib	4.12e-08	HSP70	1e-05	39243	1.05267
Combo	G13	Cabozantinib	1e-05	HSP70	1e-05	35956	0.964498
Combo	G14	Cabozantinib	3.33e-06	HSP70	1e-05	36974	0.991805
Combo	G15	Cabozantinib	1.11e-06	HSP70	1e-05	37005	0.992637
Combo	G16	Cabozantinib	3.7e-07	HSP70	1e-05	37188	0.997546
Combo	G17	Cabozantinib	1.23e-07	HSP70	1e-05	38307	1.02756
Combo	G18	Cabozantinib	4.12e-08	HSP70	1e-05	36278	0.973135
Combo	G19	Rigosertib	1e-05	HSP70	1e-05	5464	0.146568
Combo	G20	Rigosertib	3.33e-06	HSP70	1e-05	11379	0.305235
Combo	G21	Rigosertib	1.11e-06	HSP70	1e-05	13069	0.350568
Combo	G22	Rigosertib	3.7e-07	HSP70	1e-05	22651	0.607599
Combo	G23	Rigosertib	1.23e-07	HSP70	1e-05	24618	0.660363
Combo	G24	Rigosertib	4.12e-08	HSP70	1e-05	28773	0.771818
Combo	H01	Dasatinib	1e-05	HSP70	1e-05	10077	0.270309
Combo	H02	Dasatinib	3.33e-06	HSP70	1e-05	7293	0.19563
Combo	H03	Dasatinib	1.11e-06	HSP70	1e-05	11945	0.320417
Combo	H04	Dasatinib	3.7e-07	HSP70	1e-05	12539	0.336351
Combo	H05	Dasatinib	1.23e-07	HSP70	1e-05	36724	0.985099
Combo	H06	Dasatinib	4.12e-08	HSP70	1e-05	33769	0.905833
Combo	H07	Vorinostat	1e-05	HSP70	1e-05	12872	0.345284
Combo	H08	Vorinostat	3.33e-06	HSP70	1e-05	16967	0.455129
Combo	H09	Vorinostat	1.11e-06	HSP70	1e-05	32759	0.87874
Combo	H10	Vorinostat	3.7e-07	HSP70	1e-05	35025	0.939524
Combo	H11	Vorinostat	1.23e-07	HSP70	1e-05	36667	0.98357
Combo	H12	Vorinostat	4.12e-08	HSP70	1e-05	36865	0.988881
Combo	H13	Everolimus	1e-05	HSP70	1e-05	22913	0.614627
Combo	H14	Everolimus	3.33e-06	HSP70	1e-05	24223	0.649767
Combo	H15	Everolimus	1.11e-06	HSP70	1e-05	25141	0.674392
Combo	H16	Everolimus	3.7e-07	HSP70	1e-05	26506	0.711007
Combo	H17	Everolimus	1.23e-07	HSP70	1e-05	27826	0.746416
Combo	H18	Everolimus	4.12e-08	HSP70	1e-05	35326	0.947599
Combo	H19	Megestrol	1e-05	HSP70	1e-05	39536	1.06053
Combo	H20	Megestrol	3.33e-06	HSP70	1e-05	39588	1.06192
Combo	H21	Megestrol	1.11e-06	HSP70	1e-05	38798	1.04073
Combo	H22	Megestrol	3.7e-07	HSP70	1e-05	37103	0.995265
Combo	H23	Megestrol	1.23e-07	HSP70	1e-05	40680	1.09122
Combo	H24	Megestrol	4.12e-08	HSP70	1e-05	41444	1.11171
Combo	I01	Dabrafenib	1e-05	HSP70	1e-05	50385	1.35155
Combo	I02	Dabrafenib	3.33e-06	HSP70	1e-05	27838	0.746737
Combo	I03	Dabrafenib	1.11e-06	HSP70	1e-05	37772	1.01321
Combo	I04	Dabrafenib	3.7e-07	HSP70	1e-05	60091	1.6119
Combo	I05	Dabrafenib	1.23e-07	HSP70	1e-05	59584	1.5983
Combo	I06	Dabrafenib	4.12e-08	HSP70	1e-05	53353	1.43116
Combo	I07	Belinostat	1e-05	HSP70	1e-05	720	0.0193136
Combo	I08	Belinostat	3.33e-06	HSP70	1e-05	18245	0.489411
Combo	I09	Belinostat	1.11e-06	HSP70	1e-05	20529	0.550678
Combo	I10	Belinostat	3.7e-07	HSP70	1e-05	21550	0.578066
Combo	I11	Belinostat	1.23e-07	HSP70	1e-05	28973	0.777183
Combo	I12	Belinostat	4.12e-08	HSP70	1e-05	33065	0.886949
Combo	I13	Tamoxifen	1e-05	HSP70	1e-05	39249	1.05283
Combo	I14	Tamoxifen	3.33e-06	HSP70	1e-05	39432	1.05774
Combo	I15	Tamoxifen	1.11e-06	HSP70	1e-05	39682	1.06445
Combo	I16	Tamoxifen	3.7e-07	HSP70	1e-05	39783	1.06715
Combo	I17	Tamoxifen	1.23e-07	HSP70	1e-05	37919	1.01715
Combo	I18	Tamoxifen	4.12e-08	HSP70	1e-05	41023	1.10042
Combo	I19	Sunitinib	1e-05	HSP70	1e-05	42718	1.14588
Combo	I20	Sunitinib	3.33e-06	HSP70	1e-05	40678	1.09116
Combo	I21	Sunitinib	1.11e-06	HSP70	1e-05	40097	1.07558
Combo	I22	Sunitinib	3.7e-07	HSP70	1e-05	42428	1.13811
Combo	I23	Sunitinib	1.23e-07	HSP70	1e-05	39851	1.06898
Combo	I24	Sunitinib	4.12e-08	HSP70	1e-05	40966	1.09889
Combo	J01	Vemurafenib	1e-05	HSP70	1e-05	62065	1.66486
Combo	J02	Vemurafenib	3.33e-06	HSP70	1e-05	30924	0.829518
Combo	J03	Vemurafenib	1.11e-06	HSP70	1e-05	43410	1.16445
Combo	J04	Vemurafenib	3.7e-07	HSP70	1e-05	46625	1.25069
Combo	J05	Vemurafenib	1.23e-07	HSP70	1e-05	52920	1.41955
Combo	J06	Vemurafenib	4.12e-08	HSP70	1e-05	38319	1.02788
Combo	J19	Vismodegib	1e-05	HSP70	1e-05	40822	1.09503
Combo	J20	Vismodegib	3.33e-06	HSP70	1e-05	40751	1.09312
Combo	J21	Vismodegib	1.11e-06	HSP70	1e-05	42401	1.13738
Combo	J22	Vismodegib	3.7e-07	HSP70	1e-05	37661	1.01023
Combo	J23	Vismodegib	1.23e-07	HSP70	1e-05	40681	1.09124
Combo	J24	Vismodegib	4.12e-08	HSP70	1e-05	41261	1.1068
Combo	K01	Ibrutinib	1e-05	HSP70	1e-05	42388	1.13703
Combo	K02	Ibrutinib	3.33e-06	HSP70	1e-05	43758	1.17378
Combo	K03	Ibrutinib	1.11e-06	HSP70	1e-05	40245	1.07955
Combo	K04	Ibrutinib	3.7e-07	HSP70	1e-05	38332	1.02823
Combo	K05	Ibrutinib	1.23e-07	HSP70	1e-05	34411	0.923054
Combo	K06	Ibrutinib	4.12e-08	HSP70	1e-05	38720	1.03864
Combo	K07	BMS-754807	1e-05	HSP70	1e-05	9960	0.267171
Combo	K08	BMS-754807	3.33e-06	HSP70	1e-05	7602	0.203919
Combo	K09	BMS-754807	1.11e-06	HSP70	1e-05	11890	0.318942
Combo	K10	BMS-754807	3.7e-07	HSP70	1e-05	16555	0.444078
Combo	K11	BMS-754807	1.23e-07	HSP70	1e-05	19238	0.516048
Combo	K12	BMS-754807	4.12e-08	HSP70	1e-05	23070	0.618839
Combo	K13	MK2206	1e-05	HSP70	1e-05	28896	0.775118
Combo	K14	MK2206	3.33e-06	HSP70	1e-05	32399	0.869084
Combo	K15	MK2206	1.11e-06	HSP70	1e-05	31633	0.848536
Combo	K16	MK2206	3.7e-07	HSP70	1e-05	31331	0.840435
Combo	K17	MK2206	1.23e-07	HSP70	1e-05	29346	0.787189
Combo	K18	MK2206	4.12e-08	HSP70	1e-05	31938	0.856717
Combo	K19	Imatinib	1e-05	HSP70	1e-05	46665	1.25176
Combo	K20	Imatinib	3.33e-06	HSP70	1e-05	43403	1.16426
Combo	K21	Imatinib	1.11e-06	HSP70	1e-05	44441	1.1921
Combo	K22	Imatinib	3.7e-07	HSP70	1e-05	41886	1.12357
Combo	K23	Imatinib	1.23e-07	HSP70	1e-05	39983	1.07252
Combo	K24	Imatinib	4.12e-08	HSP70	1e-05	40996	1.09969
Combo	L01	Celecoxib	1e-05	HSP70	1e-05	33287	0.892904
Combo	L02	Celecoxib	3.33e-06	HSP70	1e-05	36939	0.990866
Combo	L03	Celecoxib	1.11e-06	HSP70	1e-05	38212	1.02501
Combo	L04	Celecoxib	3.7e-07	HSP70	1e-05	34723	0.931423
Combo	L05	Celecoxib	1.23e-07	HSP70	1e-05	37625	1.00927
Combo	L06	Celecoxib	4.12e-08	HSP70	1e-05	33482	0.898134
Combo	L07	Lapatinib	1e-05	HSP70	1e-05	33693	0.903794
Combo	L08	Lapatinib	3.33e-06	HSP70	1e-05	24724	0.663206
Combo	L09	Lapatinib	1.11e-06	HSP70	1e-05	22896	0.614171
Combo	L10	Lapatinib	3.7e-07	HSP70	1e-05	30350	0.81412
Combo	L11	Lapatinib	1.23e-07	HSP70	1e-05	38392	1.02984
Combo	L12	Lapatinib	4.12e-08	HSP70	1e-05	35654	0.956397
Combo	L13	Buparlisib	1e-05	HSP70	1e-05	9752	0.261591
Combo	L14	Buparlisib	3.33e-06	HSP70	1e-05	17383	0.466288
Combo	L15	Buparlisib	1.11e-06	HSP70	1e-05	21921	0.588018
Combo	L16	Buparlisib	3.7e-07	HSP70	1e-05	27939	0.749447
Combo	L17	Buparlisib	1.23e-07	HSP70	1e-05	30899	0.828847
Combo	L18	Buparlisib	4.12e-08	HSP70	1e-05	36949	0.991135
Combo	L19	Cediranib	1e-05	HSP70	1e-05	36894	0.989659
Combo	L20	Cediranib	3.33e-06	HSP70	1e-05	38261	1.02633
Combo	L21	Cediranib	1.11e-06	HSP70	1e-05	37229	0.998645
Combo	L22	Cediranib	3.7e-07	HSP70	1e-05	37719	1.01179
Combo	L23	Cediranib	1.23e-07	HSP70	1e-05	39042	1.04728
Combo	L24	Cediranib	4.12e-08	HSP70	1e-05	39672	1.06418
Combo	M01	Dactolisib	1e-05	HSP70	1e-05	21189	0.568382
Combo	M02	Dactolisib	3.33e-06	HSP70	1e-05	32066	0.860151
Combo	M03	Dactolisib	1.11e-06	HSP70	1e-05	20834	0.558859
Combo	M04	Dactolisib	3.7e-07	HSP70	1e-05	32097	0.860983
Combo	M05	Dactolisib	1.23e-07	HSP70	1e-05	34272	0.919326
Combo	M06	Dactolisib	4.12e-08	HSP70	1e-05	39373	1.05616
Combo	M07	Ruxolitinib	1e-05	HSP70	1e-05	52702	1.4137
Combo	M08	Ruxolitinib	3.33e-06	HSP70	1e-05	43327	1.16222
Combo	M09	Ruxolitinib	1.11e-06	HSP70	1e-05	41774	1.12056
Combo	M10	Ruxolitinib	3.7e-07	HSP70	1e-05	42845	1.14929
Combo	M11	Ruxolitinib	1.23e-07	HSP70	1e-05	40758	1.09331
Combo	M12	Ruxolitinib	4.12e-08	HSP70	1e-05	38802	1.04084
Combo	M13	Olaparib	1e-05	HSP70	1e-05	33338	0.894272
Combo	M14	Olaparib	3.33e-06	HSP70	1e-05	35958	0.964552
Combo	M15	Olaparib	1.11e-06	HSP70	1e-05	37616	1.00903
Combo	M16	Olaparib	3.7e-07	HSP70	1e-05	38170	1.02389
Combo	M17	Olaparib	1.23e-07	HSP70	1e-05	36099	0.968334
Combo	M18	Olaparib	4.12e-08	HSP70	1e-05	39718	1.06541
Combo	M19	Vandetanib	1e-05	HSP70	1e-05	900	0.024142
Combo	M20	Vandetanib	3.33e-06	HSP70	1e-05	29410	0.788905
Combo	M21	Vandetanib	1.11e-06	HSP70	1e-05	33446	0.897169
Combo	M22	Vandetanib	3.7e-07	HSP70	1e-05	31201	0.836948
Combo	M23	Vandetanib	1.23e-07	HSP70	1e-05	36121	0.968924
Combo	M24	Vandetanib	4.12e-08	HSP70	1e-05	36578	0.981183
Combo	N01	Erlotinib	1e-05	HSP70	1e-05	32718	0.877641
Combo	N02	Erlotinib	3.33e-06	HSP70	1e-05	31126	0.834936
Combo	N03	Erlotinib	1.11e-06	HSP70	1e-05	32557	0.873322
Combo	N04	Erlotinib	3.7e-07	HSP70	1e-05	35934	0.963908
Combo	N05	Erlotinib	1.23e-07	HSP70	1e-05	36667	0.98357
Combo	N06	Erlotinib	4.12e-08	HSP70	1e-05	40953	1.09854
Combo	N07	Palbociclib	1e-05	HSP70	1e-05	32595	0.874341
Combo	N08	Palbociclib	3.33e-06	HSP70	1e-05	33688	0.90366
Combo	N09	Palbociclib	1.11e-06	HSP70	1e-05	38325	1.02804
Combo	N10	Palbociclib	3.7e-07	HSP70	1e-05	34005	0.912164
Combo	N11	Palbociclib	1.23e-07	HSP70	1e-05	37046	0.993737
Combo	N12	Palbociclib	4.12e-08	HSP70	1e-05	35396	0.949476
Combo	N13	Rucaparib	1e-05	HSP70	1e-05	33142	0.889014
Combo	N14	Rucaparib	3.33e-06	HSP70	1e-05	37778	1.01337
Combo	N15	Rucaparib	1.11e-06	HSP70	1e-05	39377	1.05626
Combo	N16	Rucaparib	3.7e-07	HSP70	1e-05	38340	1.02845
Combo	N17	Rucaparib	1.23e-07	HSP70	1e-05	36789	0.986843
Combo	N18	Rucaparib	4.12e-08	HSP70	1e-05	41800	1.12126
Combo	N19	AZD1775	1e-05	HSP70	1e-05	26308	0.705696
Combo	N20	AZD1775	3.33e-06	HSP70	1e-05	26725	0.716882
Combo	N21	AZD1775	1.11e-06	HSP70	1e-05	32217	0.864202
Combo	N22	AZD1775	3.7e-07	HSP70	1e-05	38365	1.02912
Combo	N23	AZD1775	1.23e-07	HSP70	1e-05	37572	1.00785
Combo	N24	AZD1775	4.12e-08	HSP70	1e-05	41121	1.10305
Combo	O07	Pazopanib	1e-05	HSP70	1e-05	44680	1.19851
Combo	O08	Pazopanib	3.33e-06	HSP70	1e-05	41209	1.10541
Combo	O09	Pazopanib	1.11e-06	HSP70	1e-05	40076	1.07501
Combo	O10	Pazopanib	3.7e-07	HSP70	1e-05	45276	1.2145
Combo	O11	Pazopanib	1.23e-07	HSP70	1e-05	41053	1.10122
Combo	O12	Pazopanib	4.12e-08	HSP70	1e-05	39465	1.05862
Combo	O13	Veliparib	1e-05	HSP70	1e-05	37006	0.992664
Combo	O14	Veliparib	3.33e-06	HSP70	1e-05	40197	1.07826
Combo	O15	Veliparib	1.11e-06	HSP70	1e-05	43883	1.17713
Combo	O16	Veliparib	3.7e-07	HSP70	1e-05	40753	1.09317
Combo	O17	Veliparib	1.23e-07	HSP70	1e-05	41820	1.1218
Combo	O18	Veliparib	4.12e-08	HSP70	1e-05	33362	0.894915
Combo	O19	Poziotinib	1e-05	HSP70	1e-05	27558	0.739227
Combo	O20	Poziotinib	3.33e-06	HSP70	1e-05	24156	0.64797
Combo	O21	Poziotinib	1.11e-06	HSP70	1e-05	32925	0.883193
Combo	O22	Poziotinib	3.7e-07	HSP70	1e-05	34315	0.920479
Combo	O23	Poziotinib	1.23e-07	HSP70	1e-05	35517	0.952722
Combo	O24	Poziotinib	4.12e-08	HSP70	1e-05	36961	0.991456
Combo	C01	Busulfan	5e-06	HSP70	1e-05	36655	0.983314
Combo	C02	Busulfan	1.25e-06	HSP70	1e-05	44259	1.1873
Combo	C03	Busulfan	3.13e-07	HSP70	1e-05	41253	1.10666
Combo	C04	Busulfan	7.81e-08	HSP70	1e-05	40964	1.09891
Combo	C05	Busulfan	1.95e-08	HSP70	1e-05	34459	0.924404
Combo	C06	Busulfan	4.88e-09	HSP70	1e-05	37392	1.00309
Combo	C07	Doxorubicin	5e-06	HSP70	1e-05	593	0.0159079
Combo	C08	Doxorubicin	1.25e-06	HSP70	1e-05	19680	0.527939
Combo	C09	Doxorubicin	3.13e-07	HSP70	1e-05	35782	0.959895
Combo	C10	Doxorubicin	7.81e-08	HSP70	1e-05	37771	1.01325
Combo	C11	Doxorubicin	1.95e-08	HSP70	1e-05	38021	1.01996
Combo	C12	Doxorubicin	4.88e-09	HSP70	1e-05	42272	1.134
Combo	C13	Allopurinol	5e-06	HSP70	1e-05	37229	0.998712
Combo	C14	Allopurinol	1.25e-06	HSP70	1e-05	38286	1.02707
Combo	C15	Allopurinol	3.13e-07	HSP70	1e-05	38804	1.04096
Combo	C16	Allopurinol	7.81e-08	HSP70	1e-05	39885	1.06996
Combo	C17	Allopurinol	1.95e-08	HSP70	1e-05	39344	1.05545
Combo	C18	Allopurinol	4.88e-09	HSP70	1e-05	38308	1.02766
Combo	D01	Cyclophosphamide	5e-06	HSP70	1e-05	40826	1.09521
Combo	D02	Cyclophosphamide	1.25e-06	HSP70	1e-05	40745	1.09303
Combo	D03	Cyclophosphamide	3.13e-07	HSP70	1e-05	40694	1.09167
Combo	D04	Cyclophosphamide	7.81e-08	HSP70	1e-05	39713	1.06535
Combo	D05	Cyclophosphamide	1.95e-08	HSP70	1e-05	38604	1.0356
Combo	D06	Cyclophosphamide	4.88e-09	HSP70	1e-05	40935	1.09813
Combo	D07	Epirubicin	5e-06	HSP70	1e-05	564	0.01513
Combo	D08	Epirubicin	1.25e-06	HSP70	1e-05	594	0.0159348
Combo	D09	Epirubicin	3.13e-07	HSP70	1e-05	36977	0.991952
Combo	D10	Epirubicin	7.81e-08	HSP70	1e-05	38002	1.01945
Combo	D11	Epirubicin	1.95e-08	HSP70	1e-05	39857	1.06921
Combo	D12	Epirubicin	4.88e-09	HSP70	1e-05	38968	1.04536
Combo	D13	Pentostatin	5e-06	HSP70	1e-05	28861	0.774231
Combo	D14	Pentostatin	1.25e-06	HSP70	1e-05	32078	0.860531
Combo	D15	Pentostatin	3.13e-07	HSP70	1e-05	32855	0.881375
Combo	D16	Pentostatin	7.81e-08	HSP70	1e-05	37568	1.00781
Combo	D17	Pentostatin	1.95e-08	HSP70	1e-05	37043	0.993723
Combo	D18	Pentostatin	4.88e-09	HSP70	1e-05	37656	1.01017
Combo	D19	Mitomycin	5e-06	HSP70	1e-05	11412	0.306141
Combo	D20	Mitomycin	1.25e-06	HSP70	1e-05	33183	0.890174
Combo	D21	Mitomycin	3.13e-07	HSP70	1e-05	37317	1.00107
Combo	D22	Mitomycin	7.81e-08	HSP70	1e-05	34783	0.933095
Combo	D23	Mitomycin	1.95e-08	HSP70	1e-05	37279	1.00005
Combo	D24	Mitomycin	4.88e-09	HSP70	1e-05	42532	1.14097
Combo	E01	Temozolomide	5e-06	HSP70	1e-05	40466	1.08555
Combo	E02	Temozolomide	1.25e-06	HSP70	1e-05	39328	1.05502
Combo	E03	Temozolomide	3.13e-07	HSP70	1e-05	41582	1.11549
Combo	E04	Temozolomide	7.81e-08	HSP70	1e-05	39977	1.07243
Combo	E05	Temozolomide	1.95e-08	HSP70	1e-05	38294	1.02728
Combo	E06	Temozolomide	4.88e-09	HSP70	1e-05	35226	0.944979
Combo	E07	Ethinyl estradiol	5e-06	HSP70	1e-05	39862	1.06935
Combo	E08	Ethinyl estradiol	1.25e-06	HSP70	1e-05	39606	1.06248
Combo	E09	Ethinyl estradiol	3.13e-07	HSP70	1e-05	38134	1.02299
Combo	E10	Ethinyl estradiol	7.81e-08	HSP70	1e-05	38236	1.02573
Combo	E11	Ethinyl estradiol	1.95e-08	HSP70	1e-05	37603	1.00875
Combo	E12	Ethinyl estradiol	4.88e-09	HSP70	1e-05	40008	1.07326
Combo	E13	Cytarabine	5e-06	HSP70	1e-05	31944	0.856936
Combo	E14	Cytarabine	1.25e-06	HSP70	1e-05	37409	1.00354
Combo	E15	Cytarabine	3.13e-07	HSP70	1e-05	39561	1.06127
Combo	E16	Cytarabine	7.81e-08	HSP70	1e-05	37937	1.01771
Combo	E17	Cytarabine	1.95e-08	HSP70	1e-05	39085	1.0485
Combo	E18	Cytarabine	4.88e-09	HSP70	1e-05	40110	1.076
Combo	E19	Cisplatin	1.5e-06	HSP70	1e-05	33565	0.902176
Combo	E20	Cisplatin	3.75e-07	HSP70	1e-05	37984	1.02095
Combo	E21	Cisplatin	9.38e-08	HSP70	1e-05	40161	1.07947
Combo	E22	Cisplatin	2.34e-08	HSP70	1e-05	40684	1.09352
Combo	E23	Cisplatin	5.86e-09	HSP70	1e-05	40046	1.07638
Combo	E24	Cisplatin	1.46e-09	HSP70	1e-05	43922	1.18056
Combo	F01	Pemetrexed	5e-06	HSP70	1e-05	33920	0.911718
Combo	F02	Pemetrexed	1.25e-06	HSP70	1e-05	35336	0.949778
Combo	F03	Pemetrexed	3.13e-07	HSP70	1e-05	39501	1.06173
Combo	F04	Pemetrexed	7.81e-08	HSP70	1e-05	38969	1.04743
Combo	F05	Pemetrexed	1.95e-08	HSP70	1e-05	38564	1.03654
Combo	F06	Pemetrexed	4.88e-09	HSP70	1e-05	40084	1.0774
Combo	F07	Cabazitaxel	5e-06	HSP70	1e-05	27842	0.746895
Combo	F08	Cabazitaxel	1.25e-06	HSP70	1e-05	29757	0.798267
Combo	F09	Cabazitaxel	3.13e-07	HSP70	1e-05	28919	0.775787
Combo	F10	Cabazitaxel	7.81e-08	HSP70	1e-05	24322	0.652467
Combo	F11	Cabazitaxel	1.95e-08	HSP70	1e-05	27252	0.731067
Combo	F12	Cabazitaxel	4.88e-09	HSP70	1e-05	36915	0.990289
Combo	F13	Topotecan	5e-06	HSP70	1e-05	22502	0.603643
Combo	F14	Topotecan	1.25e-06	HSP70	1e-05	34771	0.932774
Combo	F15	Topotecan	3.13e-07	HSP70	1e-05	36475	0.978485
Combo	F16	Topotecan	7.81e-08	HSP70	1e-05	41345	1.10913
Combo	F17	Topotecan	1.95e-08	HSP70	1e-05	38392	1.02991
Combo	F18	Topotecan	4.88e-09	HSP70	1e-05	39307	1.05446
Combo	F19	Altretamine	5e-06	HSP70	1e-05	38784	1.04043
Combo	F20	Altretamine	1.25e-06	HSP70	1e-05	37688	1.01103
Combo	F21	Altretamine	3.13e-07	HSP70	1e-05	41086	1.10218
Combo	F22	Altretamine	7.81e-08	HSP70	1e-05	39746	1.06623
Combo	F23	Altretamine	1.95e-08	HSP70	1e-05	44109	1.18328
Combo	F24	Altretamine	4.88e-09	HSP70	1e-05	43418	1.16474
Combo	G01	Pralatrexate	5e-06	HSP70	1e-05	32274	0.865789
Combo	G02	Pralatrexate	1.25e-06	HSP70	1e-05	28285	0.758779
Combo	G03	Pralatrexate	3.13e-07	HSP70	1e-05	34234	0.918368
Combo	G04	Pralatrexate	7.81e-08	HSP70	1e-05	35714	0.958071
Combo	G05	Pralatrexate	1.95e-08	HSP70	1e-05	32925	0.883252
Combo	G06	Pralatrexate	4.88e-09	HSP70	1e-05	36409	0.976715
Combo	G07	Docetaxel	5e-06	HSP70	1e-05	25994	0.69732
Combo	G08	Docetaxel	1.25e-06	HSP70	1e-05	26645	0.714784
Combo	G09	Docetaxel	3.13e-07	HSP70	1e-05	27343	0.733509
Combo	G10	Docetaxel	7.81e-08	HSP70	1e-05	25002	0.670708
Combo	G11	Docetaxel	1.95e-08	HSP70	1e-05	27362	0.734018
Combo	G12	Docetaxel	4.88e-09	HSP70	1e-05	31283	0.839204
Combo	G13	Idarubicin	5e-06	HSP70	1e-05	421	0.0112938
Combo	G14	Idarubicin	1.25e-06	HSP70	1e-05	508	0.0136277
Combo	G15	Idarubicin	3.13e-07	HSP70	1e-05	11022	0.295678
Combo	G16	Idarubicin	7.81e-08	HSP70	1e-05	34676	0.930225
Combo	G17	Idarubicin	1.95e-08	HSP70	1e-05	34500	0.925504
Combo	G18	Idarubicin	4.88e-09	HSP70	1e-05	36348	0.975078
Combo	G19	Bleomycin	5e-06	HSP70	1e-05	32025	0.859109
Combo	G20	Bleomycin	1.25e-06	HSP70	1e-05	34563	0.927194
Combo	G21	Bleomycin	3.13e-07	HSP70	1e-05	35056	0.940419
Combo	G22	Bleomycin	7.81e-08	HSP70	1e-05	38390	1.02986
Combo	G23	Bleomycin	1.95e-08	HSP70	1e-05	34898	0.93618
Combo	G24	Bleomycin	4.88e-09	HSP70	1e-05	39063	1.04791
Combo	H01	Methotrexate	5e-06	HSP70	1e-05	31104	0.834402
Combo	H02	Methotrexate	1.25e-06	HSP70	1e-05	35015	0.939319
Combo	H03	Methotrexate	3.13e-07	HSP70	1e-05	35926	0.963758
Combo	H04	Methotrexate	7.81e-08	HSP70	1e-05	35348	0.948252
Combo	H05	Methotrexate	1.95e-08	HSP70	1e-05	36087	0.968077
Combo	H06	Methotrexate	4.88e-09	HSP70	1e-05	35756	0.959197
Combo	H07	Ixabepilone	5e-06	HSP70	1e-05	24442	0.655686
Combo	H08	Ixabepilone	1.25e-06	HSP70	1e-05	27107	0.727178
Combo	H09	Ixabepilone	3.13e-07	HSP70	1e-05	22269	0.597392
Combo	H10	Ixabepilone	7.81e-08	HSP70	1e-05	27811	0.746063
Combo	H11	Ixabepilone	1.95e-08	HSP70	1e-05	29377	0.788073
Combo	H12	Ixabepilone	4.88e-09	HSP70	1e-05	28668	0.769053
Combo	H13	Daunorubicin	5e-06	HSP70	1e-05	440	0.0118035
Combo	H14	Daunorubicin	1.25e-06	HSP70	1e-05	3295	0.0883923
Combo	H15	Daunorubicin	3.13e-07	HSP70	1e-05	30528	0.81895
Combo	H16	Daunorubicin	7.81e-08	HSP70	1e-05	35854	0.961826
Combo	H17	Daunorubicin	1.95e-08	HSP70	1e-05	34178	0.916866
Combo	H18	Daunorubicin	4.88e-09	HSP70	1e-05	34025	0.912761
Combo	H19	SN-38	5e-06	HSP70	1e-05	25335	0.679642
Combo	H20	SN-38	1.25e-06	HSP70	1e-05	32684	0.876787
Combo	H21	SN-38	3.13e-07	HSP70	1e-05	31561	0.846661
Combo	H22	SN-38	7.81e-08	HSP70	1e-05	33432	0.896853
Combo	H23	SN-38	1.95e-08	HSP70	1e-05	35617	0.955469
Combo	H24	SN-38	4.88e-09	HSP70	1e-05	37087	0.994903
Combo	I01	Fluorouracil	5e-06	HSP70	1e-05	28582	0.766746
Combo	I02	Fluorouracil	1.25e-06	HSP70	1e-05	37013	0.992918
Combo	I03	Fluorouracil	3.13e-07	HSP70	1e-05	51779	1.38903
Combo	I04	Fluorouracil	7.81e-08	HSP70	1e-05	44158	1.18459
Combo	I05	Fluorouracil	1.95e-08	HSP70	1e-05	41347	1.10918
Combo	I06	Fluorouracil	4.88e-09	HSP70	1e-05	29296	0.7859
Combo	I07	Vinorelbine	5e-06	HSP70	1e-05	3431	0.0920407
Combo	I08	Vinorelbine	1.25e-06	HSP70	1e-05	13843	0.371355
Combo	I09	Vinorelbine	3.13e-07	HSP70	1e-05	17021	0.456609
Combo	I10	Vinorelbine	7.81e-08	HSP70	1e-05	23996	0.643721
Combo	I11	Vinorelbine	1.95e-08	HSP70	1e-05	28520	0.765083
Combo	I12	Vinorelbine	4.88e-09	HSP70	1e-05	34494	0.925343
Combo	I13	Etoposide	5e-06	HSP70	1e-05	33708	0.904257
Combo	I14	Etoposide	1.25e-06	HSP70	1e-05	32639	0.87558
Combo	I15	Etoposide	3.13e-07	HSP70	1e-05	33374	0.895297
Combo	I16	Etoposide	7.81e-08	HSP70	1e-05	37330	1.00142
Combo	I17	Etoposide	1.95e-08	HSP70	1e-05	38353	1.02886
Combo	I18	Etoposide	4.88e-09	HSP70	1e-05	38407	1.03031
Combo	J01	Gemcitabine	5e-06	HSP70	1e-05	33306	0.893473
Combo	J02	Gemcitabine	1.25e-06	HSP70	1e-05	38431	1.03096
Combo	J03	Gemcitabine	3.13e-07	HSP70	1e-05	37210	0.998203
Combo	J04	Gemcitabine	7.81e-08	HSP70	1e-05	37375	1.00263
Combo	J05	Gemcitabine	1.95e-08	HSP70	1e-05	40411	1.08407
Combo	J06	Gemcitabine	4.88e-09	HSP70	1e-05	29754	0.798187
Combo	J07	Vinblastine	5e-06	HSP70	1e-05	6585	0.17665
Combo	J08	Vinblastine	1.25e-06	HSP70	1e-05	5538	0.148563
Combo	J09	Vinblastine	3.13e-07	HSP70	1e-05	16661	0.446951
Combo	J10	Vinblastine	7.81e-08	HSP70	1e-05	23722	0.636371
Combo	J11	Vinblastine	1.95e-08	HSP70	1e-05	25292	0.678488
Combo	J12	Vinblastine	4.88e-09	HSP70	1e-05	32486	0.871476
Combo	J13	Paclitaxel	5e-06	HSP70	1e-05	26010	0.697749
Combo	J14	Paclitaxel	1.25e-06	HSP70	1e-05	26203	0.702927
Combo	J15	Paclitaxel	3.13e-07	HSP70	1e-05	27874	0.747753
Combo	J16	Paclitaxel	7.81e-08	HSP70	1e-05	35400	0.949647
Combo	J17	Paclitaxel	1.95e-08	HSP70	1e-05	39554	1.06108
Combo	J18	Paclitaxel	4.88e-09	HSP70	1e-05	37615	1.00907
Combo	K01	Vincristine	5e-06	HSP70	1e-05	2505	0.0671996
Combo	K02	Vincristine	1.25e-06	HSP70	1e-05	4073	0.109263
Combo	K03	Vincristine	3.13e-07	HSP70	1e-05	4964	0.133165
Combo	K04	Vincristine	7.81e-08	HSP70	1e-05	10680	0.286504
Combo	K05	Vincristine	1.95e-08	HSP70	1e-05	17853	0.478928
Combo	K06	Vincristine	4.88e-09	HSP70	1e-05	18693	0.501462
Combo	K07	Carfilzomib	5e-06	HSP70	1e-05	418	0.0112133
Combo	K08	Carfilzomib	1.25e-06	HSP70	1e-05	265	0.00710894
Combo	K09	Carfilzomib	3.13e-07	HSP70	1e-05	354	0.00949647
Combo	K10	Carfilzomib	7.81e-08	HSP70	1e-05	653	0.0175175
Combo	K11	Carfilzomib	1.95e-08	HSP70	1e-05	22091	0.592617
Combo	K12	Carfilzomib	4.88e-09	HSP70	1e-05	35641	0.956112
Combo	K13	Hydroxyurea	5e-06	HSP70	1e-05	37417	1.00376
Combo	K14	Hydroxyurea	1.25e-06	HSP70	1e-05	35613	0.955361
Combo	K15	Hydroxyurea	3.13e-07	HSP70	1e-05	36602	0.981892
Combo	K16	Hydroxyurea	7.81e-08	HSP70	1e-05	39418	1.05743
Combo	K17	Hydroxyurea	1.95e-08	HSP70	1e-05	36286	0.973415
Combo	K18	Hydroxyurea	4.88e-09	HSP70	1e-05	33551	0.900046
Combo	B01	Afuresertib	1e-05	HSP70	1e-05	16131	0.430011
Combo	B02	Afuresertib	3.33e-06	HSP70	1e-05	17916	0.477594
Combo	B03	Afuresertib	1.11e-06	HSP70	1e-05	23401	0.62381
Combo	B04	Afuresertib	3.7e-07	HSP70	1e-05	26410	0.704023
Combo	B05	Afuresertib	1.23e-07	HSP70	1e-05	30215	0.805454
Combo	B06	Afuresertib	4.12e-08	HSP70	1e-05	34186	0.911311
Combo	B13	Linsitinib	1e-05	HSP70	1e-05	2789	0.0743476
Combo	B14	Linsitinib	3.33e-06	HSP70	1e-05	16854	0.449284
Combo	B15	Linsitinib	1.11e-06	HSP70	1e-05	19225	0.512489
Combo	B16	Linsitinib	3.7e-07	HSP70	1e-05	28610	0.762669
Combo	B17	Linsitinib	1.23e-07	HSP70	1e-05	29887	0.79671
Combo	B18	Linsitinib	4.12e-08	HSP70	1e-05	36112	0.962653
Combo	B19	AZD5363	1e-05	HSP70	1e-05	19403	0.517234
Combo	B20	AZD5363	3.33e-06	HSP70	1e-05	24379	0.649881
Combo	B21	AZD5363	1.11e-06	HSP70	1e-05	26476	0.705782
Combo	B22	AZD5363	3.7e-07	HSP70	1e-05	33435	0.891291
Combo	B23	AZD5363	1.23e-07	HSP70	1e-05	37787	1.0073
Combo	B24	AZD5363	4.12e-08	HSP70	1e-05	35398	0.94362
Combo	C01	Alisertib	1e-05	HSP70	1e-05	27125	0.723083
Combo	C02	Alisertib	3.33e-06	HSP70	1e-05	27237	0.726068
Combo	C03	Alisertib	1.11e-06	HSP70	1e-05	33335	0.888625
Combo	C04	Alisertib	3.7e-07	HSP70	1e-05	35545	0.947538
Combo	C05	Alisertib	1.23e-07	HSP70	1e-05	33960	0.905286
Combo	C06	Alisertib	4.12e-08	HSP70	1e-05	38004	1.01309
Combo	C07	Capmatinib	4.84e-06	HSP70	1e-05	41888	1.11663
Combo	C08	Capmatinib	1.61e-06	HSP70	1e-05	42982	1.14579
Combo	C09	Capmatinib	5.38e-07	HSP70	1e-05	42424	1.13091
Combo	C10	Capmatinib	1.79e-07	HSP70	1e-05	39400	1.0503
Combo	C11	Capmatinib	5.98e-08	HSP70	1e-05	41868	1.11609
Combo	C12	Capmatinib	1.99e-08	HSP70	1e-05	39548	1.05425
Combo	C13	Momelotinib	1e-05	HSP70	1e-05	41139	1.09666
Combo	C14	Momelotinib	3.33e-06	HSP70	1e-05	40890	1.09002
Combo	C15	Momelotinib	1.11e-06	HSP70	1e-05	41252	1.09967
Combo	C16	Momelotinib	3.7e-07	HSP70	1e-05	42828	1.14168
Combo	C17	Momelotinib	1.23e-07	HSP70	1e-05	39402	1.05036
Combo	C18	Momelotinib	4.12e-08	HSP70	1e-05	38976	1.039
Combo	C19	GF-109203	1e-05	HSP70	1e-05	39484	1.05254
Combo	C20	GF-109203	3.33e-06	HSP70	1e-05	40477	1.07901
Combo	C21	GF-109203	1.11e-06	HSP70	1e-05	40359	1.07587
Combo	C22	GF-109203	3.7e-07	HSP70	1e-05	40892	1.09008
Combo	C23	GF-109203	1.23e-07	HSP70	1e-05	41663	1.11063
Combo	C24	GF-109203	4.12e-08	HSP70	1e-05	44671	1.19081
Combo	D01	Venetoclax	1e-05	HSP70	1e-05	30277	0.807107
Combo	D02	Venetoclax	3.33e-06	HSP70	1e-05	32907	0.877216
Combo	D03	Venetoclax	1.11e-06	HSP70	1e-05	40931	1.09112
Combo	D04	Venetoclax	3.7e-07	HSP70	1e-05	37162	0.990643
Combo	D05	Venetoclax	1.23e-07	HSP70	1e-05	38952	1.03836
Combo	D06	Venetoclax	4.12e-08	HSP70	1e-05	35636	0.949964
Combo	D07	Pinometostat	1e-05	HSP70	1e-05	37094	0.988831
Combo	D08	Pinometostat	3.33e-06	HSP70	1e-05	39547	1.05422
Combo	D09	Pinometostat	1.11e-06	HSP70	1e-05	41129	1.09639
Combo	D10	Pinometostat	3.7e-07	HSP70	1e-05	38060	1.01458
Combo	D11	Pinometostat	1.23e-07	HSP70	1e-05	39245	1.04617
Combo	D12	Pinometostat	4.12e-08	HSP70	1e-05	40745	1.08616
Combo	D13	Binimetinib	1e-05	HSP70	1e-05	22170	0.590995
Combo	D14	Binimetinib	3.33e-06	HSP70	1e-05	23493	0.626263
Combo	D15	Binimetinib	1.11e-06	HSP70	1e-05	27239	0.726122
Combo	D16	Binimetinib	3.7e-07	HSP70	1e-05	26279	0.70053
Combo	D17	Binimetinib	1.23e-07	HSP70	1e-05	32719	0.872204
Combo	D18	Binimetinib	4.12e-08	HSP70	1e-05	28788	0.767414
Combo	D19	Midostaurin	1e-05	HSP70	1e-05	39641	1.05673
Combo	D20	Midostaurin	3.33e-06	HSP70	1e-05	46336	1.2352
Combo	D21	Midostaurin	1.11e-06	HSP70	1e-05	43398	1.15688
Combo	D22	Midostaurin	3.7e-07	HSP70	1e-05	40639	1.08333
Combo	D23	Midostaurin	1.23e-07	HSP70	1e-05	46734	1.24581
Combo	D24	Midostaurin	4.12e-08	HSP70	1e-05	44131	1.17642
Combo	E01	Sepantronium	1e-05	HSP70	1e-05	658	0.0175406
Combo	E02	Sepantronium	3.33e-06	HSP70	1e-05	11152	0.297284
Combo	E03	Sepantronium	1.11e-06	HSP70	1e-05	33674	0.897662
Combo	E04	Sepantronium	3.7e-07	HSP70	1e-05	40863	1.0893
Combo	E05	Sepantronium	1.23e-07	HSP70	1e-05	38295	1.02085
Combo	E06	Sepantronium	4.12e-08	HSP70	1e-05	38481	1.0258
Combo	E07	GDC0994	1e-05	HSP70	1e-05	31254	0.833151
Combo	E08	GDC0994	3.33e-06	HSP70	1e-05	30397	0.810306
Combo	E09	GDC0994	1.11e-06	HSP70	1e-05	32760	0.873297
Combo	E10	GDC0994	3.7e-07	HSP70	1e-05	36082	0.961853
Combo	E11	GDC0994	1.23e-07	HSP70	1e-05	36772	0.980247
Combo	E12	GDC0994	4.12e-08	HSP70	1e-05	39247	1.04622
Combo	E13	Temsirolimus	1e-05	HSP70	1e-05	25354	0.675872
Combo	E14	Temsirolimus	3.33e-06	HSP70	1e-05	28115	0.749474
Combo	E15	Temsirolimus	1.11e-06	HSP70	1e-05	29374	0.783035
Combo	E16	Temsirolimus	3.7e-07	HSP70	1e-05	31196	0.831605
Combo	E17	Temsirolimus	1.23e-07	HSP70	1e-05	32297	0.860955
Combo	E18	Temsirolimus	4.12e-08	HSP70	1e-05	37676	1.00435
Combo	E19	Oprozomib	1e-05	HSP70	1e-05	659	0.0175672
Combo	E20	Oprozomib	3.33e-06	HSP70	1e-05	545	0.0145283
Combo	E21	Oprozomib	1.11e-06	HSP70	1e-05	519	0.0138352
Combo	E22	Oprozomib	3.7e-07	HSP70	1e-05	615	0.0163943
Combo	E23	Oprozomib	1.23e-07	HSP70	1e-05	3277	0.0873564
Combo	E24	Oprozomib	4.12e-08	HSP70	1e-05	11888	0.316903
Combo	F01	CPI-203	1e-05	HSP70	1e-05	22393	0.59694
Combo	F02	CPI-203	3.33e-06	HSP70	1e-05	21521	0.573694
Combo	F03	CPI-203	1.11e-06	HSP70	1e-05	28374	0.756378
Combo	F04	CPI-203	3.7e-07	HSP70	1e-05	29287	0.780716
Combo	F05	CPI-203	1.23e-07	HSP70	1e-05	35281	0.940501
Combo	F06	CPI-203	4.12e-08	HSP70	1e-05	38752	1.03303
Combo	F07	Tazemetostat	1e-05	HSP70	1e-05	36935	0.984592
Combo	F08	Tazemetostat	3.33e-06	HSP70	1e-05	40150	1.0703
Combo	F09	Tazemetostat	1.11e-06	HSP70	1e-05	39905	1.06376
Combo	F10	Tazemetostat	3.7e-07	HSP70	1e-05	42324	1.12825
Combo	F11	Tazemetostat	1.23e-07	HSP70	1e-05	36363	0.969344
Combo	F12	Tazemetostat	4.12e-08	HSP70	1e-05	41771	1.11351
Combo	F13	Toremifene	1e-05	HSP70	1e-05	38650	1.03031
Combo	F14	Toremifene	3.33e-06	HSP70	1e-05	39182	1.04449
Combo	F15	Toremifene	1.11e-06	HSP70	1e-05	36200	0.964999
Combo	F16	Toremifene	3.7e-07	HSP70	1e-05	38813	1.03465
Combo	F17	Toremifene	1.23e-07	HSP70	1e-05	40889	1.09
Combo	F18	Toremifene	4.12e-08	HSP70	1e-05	39141	1.0434
Combo	F19	Tretinoin	1e-05	HSP70	1e-05	31412	0.837363
Combo	F20	Tretinoin	3.33e-06	HSP70	1e-05	32822	0.87495
Combo	F21	Tretinoin	1.11e-06	HSP70	1e-05	32449	0.865007
Combo	F22	Tretinoin	3.7e-07	HSP70	1e-05	32877	0.876416
Combo	F23	Tretinoin	1.23e-07	HSP70	1e-05	35440	0.944739
Combo	F24	Tretinoin	4.12e-08	HSP70	1e-05	36404	0.970437
Combo	G01	AT7519	1e-05	HSP70	1e-05	358	0.00954336
Combo	G02	AT7519	3.33e-06	HSP70	1e-05	4409	0.117533
Combo	G03	AT7519	1.11e-06	HSP70	1e-05	14077	0.375257
Combo	G04	AT7519	3.7e-07	HSP70	1e-05	25999	0.693066
Combo	G05	AT7519	1.23e-07	HSP70	1e-05	28172	0.750993
Combo	G06	AT7519	4.12e-08	HSP70	1e-05	33933	0.904566
Combo	G07	GSK503	1e-05	HSP70	1e-05	39122	1.04289
Combo	G08	GSK503	3.33e-06	HSP70	1e-05	37928	1.01106
Combo	G09	GSK503	1.11e-06	HSP70	1e-05	37703	1.00506
Combo	G10	GSK503	3.7e-07	HSP70	1e-05	37502	0.999707
Combo	G11	GSK503	1.23e-07	HSP70	1e-05	40646	1.08352
Combo	G12	GSK503	4.12e-08	HSP70	1e-05	35026	0.933703
Combo	G13	Pictilisib	1e-05	HSP70	1e-05	25030	0.667235
Combo	G14	Pictilisib	3.33e-06	HSP70	1e-05	33558	0.89457
Combo	G15	Pictilisib	1.11e-06	HSP70	1e-05	34331	0.915176
Combo	G16	Pictilisib	3.7e-07	HSP70	1e-05	32147	0.856956
Combo	G17	Pictilisib	1.23e-07	HSP70	1e-05	37308	0.994535
Combo	G18	Pictilisib	4.12e-08	HSP70	1e-05	38891	1.03673
Combo	G19	Imiquimod	1e-05	HSP70	1e-05	38420	1.02418
Combo	G20	Imiquimod	3.33e-06	HSP70	1e-05	38238	1.01933
Combo	G21	Imiquimod	1.11e-06	HSP70	1e-05	42933	1.14448
Combo	G22	Imiquimod	3.7e-07	HSP70	1e-05	37251	0.993016
Combo	G23	Imiquimod	1.23e-07	HSP70	1e-05	38872	1.03623
Combo	G24	Imiquimod	4.12e-08	HSP70	1e-05	36937	0.984645
Combo	H01	Abemaciclib	1e-05	HSP70	1e-05	18685	0.498094
Combo	H02	Abemaciclib	3.33e-06	HSP70	1e-05	18963	0.505505
Combo	H03	Abemaciclib	1.11e-06	HSP70	1e-05	25880	0.689894
Combo	H04	Abemaciclib	3.7e-07	HSP70	1e-05	26945	0.718284
Combo	H05	Abemaciclib	1.23e-07	HSP70	1e-05	33851	0.902381
Combo	H06	Abemaciclib	4.12e-08	HSP70	1e-05	36506	0.973156
Combo	H07	Defactinib	9.79e-06	HSP70	1e-05	41147	1.09687
Combo	H08	Defactinib	3.26e-06	HSP70	1e-05	38064	1.01469
Combo	H09	Defactinib	1.09e-06	HSP70	1e-05	41267	1.10007
Combo	H10	Defactinib	3.63e-07	HSP70	1e-05	36804	0.9811
Combo	H11	Defactinib	1.21e-07	HSP70	1e-05	41414	1.10399
Combo	H12	Defactinib	4.03e-08	HSP70	1e-05	37992	1.01277
Combo	H13	Talazoparib	1e-05	HSP70	1e-05	29084	0.775305
Combo	H14	Talazoparib	3.33e-06	HSP70	1e-05	30853	0.822462
Combo	H15	Talazoparib	1.11e-06	HSP70	1e-05	35343	0.942153
Combo	H16	Talazoparib	3.7e-07	HSP70	1e-05	36129	0.963106
Combo	H17	Talazoparib	1.23e-07	HSP70	1e-05	37143	0.990137
Combo	H18	Talazoparib	4.12e-08	HSP70	1e-05	36535	0.973929
Combo	H19	Nilotinib	1e-05	HSP70	1e-05	37781	1.00714
Combo	H20	Nilotinib	3.33e-06	HSP70	1e-05	38209	1.01855
Combo	H21	Nilotinib	1.11e-06	HSP70	1e-05	37913	1.01066
Combo	H22	Nilotinib	3.7e-07	HSP70	1e-05	37948	1.0116
Combo	H23	Nilotinib	1.23e-07	HSP70	1e-05	40865	1.08936
Combo	H24	Nilotinib	4.12e-08	HSP70	1e-05	37236	0.992616
Combo	I01	Ribociclib	1e-05	HSP70	1e-05	30145	0.803588
Combo	I02	Ribociclib	3.33e-06	HSP70	1e-05	30781	0.820542
Combo	I03	Ribociclib	1.11e-06	HSP70	1e-05	35613	0.949351
Combo	I04	Ribociclib	3.7e-07	HSP70	1e-05	34476	0.919041
Combo	I05	Ribociclib	1.23e-07	HSP70	1e-05	36263	0.966678
Combo	I06	Ribociclib	4.12e-08	HSP70	1e-05	35994	0.959507
Combo	I07	Erdafitinib	1e-05	HSP70	1e-05	49783	1.32709
Combo	I08	Erdafitinib	3.33e-06	HSP70	1e-05	42610	1.13587
Combo	I09	Erdafitinib	1.11e-06	HSP70	1e-05	40123	1.06958
Combo	I10	Erdafitinib	3.7e-07	HSP70	1e-05	38552	1.0277
Combo	I11	Erdafitinib	1.23e-07	HSP70	1e-05	39790	1.0607
Combo	I12	Erdafitinib	4.12e-08	HSP70	1e-05	37958	1.01186
Combo	I13	GSK2636771	1e-05	HSP70	1e-05	38274	1.02029
Combo	I14	GSK2636771	3.33e-06	HSP70	1e-05	39932	1.06448
Combo	I15	GSK2636771	1.11e-06	HSP70	1e-05	37291	0.994082
Combo	I16	GSK2636771	3.7e-07	HSP70	1e-05	38209	1.01855
Combo	I17	GSK2636771	1.23e-07	HSP70	1e-05	38472	1.02556
Combo	I18	GSK2636771	4.12e-08	HSP70	1e-05	36102	0.962386
Combo	I19	Regorafenib	1e-05	HSP70	1e-05	38505	1.02644
Combo	I20	Regorafenib	3.33e-06	HSP70	1e-05	38224	1.01895
Combo	I21	Regorafenib	1.11e-06	HSP70	1e-05	37529	1.00043
Combo	I22	Regorafenib	3.7e-07	HSP70	1e-05	37965	1.01205
Combo	I23	Regorafenib	1.23e-07	HSP70	1e-05	39615	1.05603
Combo	I24	Regorafenib	4.12e-08	HSP70	1e-05	39548	1.05425
Combo	J01	BML-EI388	1e-05	HSP70	1e-05	36143	0.963479
Combo	J02	BML-EI388	3.33e-06	HSP70	1e-05	41520	1.10682
Combo	J03	BML-EI388	1.11e-06	HSP70	1e-05	37677	1.00437
Combo	J04	BML-EI388	3.7e-07	HSP70	1e-05	37631	1.00315
Combo	J05	BML-EI388	1.23e-07	HSP70	1e-05	35228	0.939088
Combo	J06	BML-EI388	4.12e-08	HSP70	1e-05	39020	1.04017
Combo	J07	Entinostat	1e-05	HSP70	1e-05	1834	0.0488897
Combo	J08	Entinostat	3.33e-06	HSP70	1e-05	25599	0.682403
Combo	J09	Entinostat	1.11e-06	HSP70	1e-05	37898	1.01026
Combo	J10	Entinostat	3.7e-07	HSP70	1e-05	37795	1.00752
Combo	J11	Entinostat	1.23e-07	HSP70	1e-05	39959	1.0652
Combo	J12	Entinostat	4.12e-08	HSP70	1e-05	41713	1.11196
Combo	J13	Apitolisib	1e-05	HSP70	1e-05	4716	0.125716
Combo	J14	Apitolisib	3.33e-06	HSP70	1e-05	8228	0.219337
Combo	J15	Apitolisib	1.11e-06	HSP70	1e-05	13258	0.353424
Combo	J16	Apitolisib	3.7e-07	HSP70	1e-05	16798	0.447791
Combo	J17	Apitolisib	1.23e-07	HSP70	1e-05	23914	0.637486
Combo	J18	Apitolisib	4.12e-08	HSP70	1e-05	30470	0.812252
Combo	J19	Afatinib	1e-05	HSP70	1e-05	7900	0.210594
Combo	J20	Afatinib	3.33e-06	HSP70	1e-05	24171	0.644337
Combo	J21	Afatinib	1.11e-06	HSP70	1e-05	25310	0.674699
Combo	J22	Afatinib	3.7e-07	HSP70	1e-05	30303	0.8078
Combo	J23	Afatinib	1.23e-07	HSP70	1e-05	29338	0.782076
Combo	J24	Afatinib	4.12e-08	HSP70	1e-05	34060	0.907952
Combo	K07	Onalespib	1e-05	HSP70	1e-05	632	0.0168475
Combo	K08	Onalespib	3.33e-06	HSP70	1e-05	549	0.0146349
Combo	K09	Onalespib	1.11e-06	HSP70	1e-05	518	0.0138085
Combo	K10	Onalespib	3.7e-07	HSP70	1e-05	2744	0.073148
Combo	K11	Onalespib	1.23e-07	HSP70	1e-05	28094	0.748914
Combo	K12	Onalespib	4.12e-08	HSP70	1e-05	41734	1.11252
Combo	K13	Duvelisib	1e-05	HSP70	1e-05	16338	0.435529
Combo	K14	Duvelisib	3.33e-06	HSP70	1e-05	26853	0.715832
Combo	K15	Duvelisib	1.11e-06	HSP70	1e-05	28333	0.755285
Combo	K16	Duvelisib	3.7e-07	HSP70	1e-05	31140	0.830112
Combo	K17	Duvelisib	1.23e-07	HSP70	1e-05	35174	0.937648
Combo	K18	Duvelisib	4.12e-08	HSP70	1e-05	34908	0.930557
Combo	J07	DMSO	0	HSP70	1e-05	30578	0.820236
Combo	J08	DMSO	0	HSP70	1e-05	20835	0.558886
Combo	J09	DMSO	0	HSP70	1e-05	36455	0.977883
Combo	J10	DMSO	0	HSP70	1e-05	38123	1.02263
Combo	J11	DMSO	0	HSP70	1e-05	39347	1.05546
Combo	J12	DMSO	0	HSP70	1e-05	38104	1.02212
Combo	L01	DMSO	0	HSP70	1e-05	40850	1.09585
Combo	L03	DMSO	0	HSP70	1e-05	36124	0.969069
Combo	L04	DMSO	0	HSP70	1e-05	36413	0.976822
Combo	L05	DMSO	0	HSP70	1e-05	39832	1.06854
Combo	L06	DMSO	0	HSP70	1e-05	37268	0.999759
Combo	L07	DMSO	0	HSP70	1e-05	37277	1
Combo	L08	DMSO	0	HSP70	1e-05	34124	0.915417
Combo	L09	DMSO	0	HSP70	1e-05	37992	1.01918
Combo	L10	DMSO	0	HSP70	1e-05	39277	1.05365
Combo	L11	DMSO	0	HSP70	1e-05	36991	0.992328
Combo	L12	DMSO	0	HSP70	1e-05	38608	1.03571
Combo	L13	PBS	0	HSP70	1e-05	37335	1.00351
Combo	L14	PBS	0	HSP70	1e-05	38225	1.02743
Combo	L15	PBS	0	HSP70	1e-05	36903	0.991896
Combo	L16	PBS	0	HSP70	1e-05	36663	0.985445
Combo	L17	PBS	0	HSP70	1e-05	37379	1.00469
Combo	L18	PBS	0	HSP70	1e-05	35801	0.962276
Combo	L19	PBS	0	HSP70	1e-05	35332	0.94967
Combo	L20	PBS	0	HSP70	1e-05	38123	1.02469
Combo	L21	PBS	0	HSP70	1e-05	37074	0.996492
Combo	L22	PBS	0	HSP70	1e-05	37390	1.00499
Combo	L23	PBS	0	HSP70	1e-05	36806	0.989289
Combo	L24	PBS	0	HSP70	1e-05	38072	1.02332
Combo	L07	DMSO	0	HSP70	1e-05	37537	1.00064
Combo	L08	DMSO	0	HSP70	1e-05	36162	0.963986
Combo	L09	DMSO	0	HSP70	1e-05	36018	0.960147
Combo	L10	DMSO	0	HSP70	1e-05	36323	0.968278
Combo	L11	DMSO	0	HSP70	1e-05	36569	0.974835
Combo	L12	DMSO	0	HSP70	1e-05	39190	1.0447
Combo	L13	DMSO	0	HSP70	1e-05	37835	1.00858
Combo	L14	DMSO	0	HSP70	1e-05	38293	1.02079
Combo	L15	DMSO	0	HSP70	1e-05	37489	0.99936
Combo	L16	DMSO	0	HSP70	1e-05	36202	0.965052
Combo	L17	DMSO	0	HSP70	1e-05	40466	1.07872
Combo	L18	DMSO	0	HSP70	1e-05	38585	1.02858
Combo	A02	Bortezomib	1e-05	HSP70	1e-05	256	0.00686704
Combo	A04	Bortezomib	1e-05	HSP70	1e-05	41	0.0010998
Combo	A12	Bortezomib	1e-05	HSP70	1e-05	392	0.0105152
Combo	A14	Bortezomib	1e-05	HSP70	1e-05	525	0.0140828
Combo	J13	Bortezomib	1e-05	HSP70	1e-05	675	0.0181065
Combo	J14	Bortezomib	3.33e-06	HSP70	1e-05	617	0.0165507
Combo	J15	Bortezomib	1.11e-06	HSP70	1e-05	818	0.0219424
Combo	J16	Bortezomib	3.7e-07	HSP70	1e-05	765	0.0205207
Combo	J17	Bortezomib	1.23e-07	HSP70	1e-05	714	0.0191526
Combo	J18	Bortezomib	4.12e-08	HSP70	1e-05	1024	0.0274682
Combo	P02	Bortezomib	1e-05	HSP70	1e-05	549	0.0147266
Combo	P04	Bortezomib	1e-05	HSP70	1e-05	253	0.00678657
Combo	P12	Bortezomib	1e-05	HSP70	1e-05	691	0.0185357
Combo	P14	Bortezomib	1e-05	HSP70	1e-05	743	0.0199305
Combo	A02	Bortezomib	1e-05	HSP70	1e-05	595	0.0159616
Combo	A04	Bortezomib	1e-05	HSP70	1e-05	275	0.0073772
Combo	A12	Bortezomib	1e-05	HSP70	1e-05	184	0.00493602
Combo	A14	Bortezomib	5e-06	HSP70	1e-05	438	0.0117499
Combo	I19	Bortezomib	5e-06	HSP70	1e-05	391	0.010489
Combo	I20	Bortezomib	1.25e-06	HSP70	1e-05	368	0.00987204
Combo	I21	Bortezomib	3.13e-07	HSP70	1e-05	460	0.01234
Combo	I22	Bortezomib	7.81e-08	HSP70	1e-05	523	0.0140301
Combo	I23	Bortezomib	1.95e-08	HSP70	1e-05	756	0.0202806
Combo	I24	Bortezomib	4.88e-09	HSP70	1e-05	1514	0.0406149
Combo	J19	Bortezomib	5e-06	HSP70	1e-05	249	0.00667972
Combo	J20	Bortezomib	1.25e-06	HSP70	1e-05	346	0.00928186
Combo	J21	Bortezomib	3.13e-07	HSP70	1e-05	300	0.00804786
Combo	J22	Bortezomib	7.81e-08	HSP70	1e-05	701	0.0188052
Combo	J23	Bortezomib	1.95e-08	HSP70	1e-05	1166	0.0312793
Combo	J24	Bortezomib	4.88e-09	HSP70	1e-05	18773	0.503608
Combo	K19	Bortezomib	5e-06	HSP70	1e-05	494	0.0132521
Combo	K20	Bortezomib	1.25e-06	HSP70	1e-05	392	0.0105159
Combo	K21	Bortezomib	3.13e-07	HSP70	1e-05	593	0.0159079
Combo	K22	Bortezomib	7.81e-08	HSP70	1e-05	474	0.0127156
Combo	K23	Bortezomib	1.95e-08	HSP70	1e-05	2289	0.0614052
Combo	K24	Bortezomib	4.88e-09	HSP70	1e-05	27859	0.747351
Combo	P02	Bortezomib	1e-05	HSP70	1e-05	486	0.0130375
Combo	P04	Bortezomib	1e-05	HSP70	1e-05	291	0.00780642
Combo	P12	Bortezomib	1e-05	HSP70	1e-05	564	0.01513
Combo	P14	Bortezomib	5e-06	HSP70	1e-05	567	0.0152105
Combo	A02	Bortezomib	1e-05	HSP70	1e-05	567	0.0151148
Combo	A04	Bortezomib	1e-05	HSP70	1e-05	645	0.017194
Combo	A12	Bortezomib	1e-05	HSP70	1e-05	719	0.0191667
Combo	A14	Bortezomib	1e-05	HSP70	1e-05	394	0.010503
Combo	K19	Bortezomib	1e-05	HSP70	1e-05	301	0.00802389
Combo	K20	Bortezomib	3.33e-06	HSP70	1e-05	276	0.00735745
Combo	K21	Bortezomib	1.11e-06	HSP70	1e-05	259	0.00690427
Combo	K22	Bortezomib	3.7e-07	HSP70	1e-05	453	0.0120758
Combo	K23	Bortezomib	1.23e-07	HSP70	1e-05	579	0.0154346
Combo	K24	Bortezomib	4.12e-08	HSP70	1e-05	891	0.0237518
Combo	L19	Bortezomib	1e-05	HSP70	1e-05	484	0.0129022
Combo	L20	Bortezomib	3.33e-06	HSP70	1e-05	415	0.0110628
Combo	L21	Bortezomib	1.11e-06	HSP70	1e-05	371	0.0098899
Combo	L22	Bortezomib	3.7e-07	HSP70	1e-05	477	0.0127156
Combo	L23	Bortezomib	1.23e-07	HSP70	1e-05	880	0.0234585
Combo	L24	Bortezomib	4.12e-08	HSP70	1e-05	1220	0.0325221
Combo	P02	Bortezomib	1e-05	HSP70	1e-05	715	0.0190601
Combo	P04	Bortezomib	1e-05	HSP70	1e-05	692	0.0184469
Combo	P12	Bortezomib	1e-05	HSP70	1e-05	713	0.0190067
Combo	P14	Bortezomib	1e-05	HSP70	1e-05	742	0.0197798
Single	B07	Neratinib	1e-05	DMSO	0	79641	0.652464
Single	B08	Neratinib	3.33e-06	DMSO	0	130870	1.07216
Single	B09	Neratinib	1.11e-06	DMSO	0	126045	1.03263
Single	B10	Neratinib	3.7e-07	DMSO	0	129396	1.06008
Single	B11	Neratinib	1.23e-07	DMSO	0	119442	0.978535
Single	B12	Neratinib	4.12e-08	DMSO	0	126577	1.03699
Single	B13	Ponatinib	1e-05	DMSO	0	135963	1.11388
Single	B14	Ponatinib	3.33e-06	DMSO	0	122895	1.00682
Single	B15	Ponatinib	1.11e-06	DMSO	0	131388	1.0764
Single	B16	Ponatinib	3.7e-07	DMSO	0	124423	1.01934
Single	B17	Ponatinib	1.23e-07	DMSO	0	72481	0.593805
Single	B18	Ponatinib	4.12e-08	DMSO	0	18836	0.154315
Single	B19	NVP-BGT226	1e-05	DMSO	0	1513	0.0123953
Single	B20	NVP-BGT226	3.33e-06	DMSO	0	19389	0.158846
Single	B21	NVP-BGT226	1.11e-06	DMSO	0	35293	0.28914
Single	B22	NVP-BGT226	3.7e-07	DMSO	0	124331	1.01859
Single	B23	NVP-BGT226	1.23e-07	DMSO	0	132058	1.08189
Single	B24	NVP-BGT226	4.12e-08	DMSO	0	120700	0.988842
Single	C07	Fulvestrant	1e-05	DMSO	0	12630	0.103472
Single	C08	Fulvestrant	3.33e-06	DMSO	0	147947	1.21206
Single	C09	Fulvestrant	1.11e-06	DMSO	0	156692	1.28371
Single	C10	Fulvestrant	3.7e-07	DMSO	0	138670	1.13606
Single	C11	Fulvestrant	1.23e-07	DMSO	0	137069	1.12295
Single	C12	Fulvestrant	4.12e-08	DMSO	0	137968	1.13031
Single	C13	Sorafenib	1e-05	DMSO	0	133892	1.09692
Single	C14	Sorafenib	3.33e-06	DMSO	0	139846	1.1457
Single	C15	Sorafenib	1.11e-06	DMSO	0	153435	1.25703
Single	C16	Sorafenib	3.7e-07	DMSO	0	134471	1.10166
Single	C17	Sorafenib	1.23e-07	DMSO	0	126043	1.03261
Single	C18	Sorafenib	4.12e-08	DMSO	0	131903	1.08062
Single	C19	Alpelisib	1e-05	DMSO	0	112005	0.917607
Single	C20	Alpelisib	3.33e-06	DMSO	0	119854	0.981911
Single	C21	Alpelisib	1.11e-06	DMSO	0	101359	0.830389
Single	C22	Alpelisib	3.7e-07	DMSO	0	137563	1.12699
Single	C23	Alpelisib	1.23e-07	DMSO	0	139095	1.13954
Single	C24	Alpelisib	4.12e-08	DMSO	0	136236	1.11612
Single	D01	Enzalutamide	1e-05	DMSO	0	136799	1.12073
Single	D02	Enzalutamide	3.33e-06	DMSO	0	136986	1.12227
Single	D03	Enzalutamide	1.11e-06	DMSO	0	126039	1.03258
Single	D04	Enzalutamide	3.7e-07	DMSO	0	120130	0.984172
Single	D05	Enzalutamide	1.23e-07	DMSO	0	125976	1.03207
Single	D06	Enzalutamide	4.12e-08	DMSO	0	118328	0.969409
Single	D07	AZD4547	1e-05	DMSO	0	123497	1.01176
Single	D08	AZD4547	3.33e-06	DMSO	0	127553	1.04499
Single	D09	AZD4547	1.11e-06	DMSO	0	130030	1.06528
Single	D10	AZD4547	3.7e-07	DMSO	0	120573	0.987801
Single	D11	AZD4547	1.23e-07	DMSO	0	122084	1.00018
Single	D12	AZD4547	4.12e-08	DMSO	0	150596	1.23377
Single	D13	Teniposide	1e-05	DMSO	0	103004	0.843866
Single	D14	Teniposide	3.33e-06	DMSO	0	85739	0.702422
Single	D15	Teniposide	1.11e-06	DMSO	0	103543	0.848282
Single	D16	Teniposide	3.7e-07	DMSO	0	98644	0.808147
Single	D17	Teniposide	1.23e-07	DMSO	0	104277	0.854295
Single	D18	Teniposide	4.12e-08	DMSO	0	144595	1.1846
Single	D19	AZD6482	1e-05	DMSO	0	110914	0.908669
Single	D20	AZD6482	3.33e-06	DMSO	0	131608	1.07821
Single	D21	AZD6482	1.11e-06	DMSO	0	139842	1.14566
Single	D22	AZD6482	3.7e-07	DMSO	0	133466	1.09343
Single	D23	AZD6482	1.23e-07	DMSO	0	136329	1.11688
Single	D24	AZD6482	4.12e-08	DMSO	0	143632	1.17671
Single	E01	Osimertinib	1e-05	DMSO	0	32401	0.265447
Single	E02	Osimertinib	3.33e-06	DMSO	0	75429	0.617956
Single	E03	Osimertinib	1.11e-06	DMSO	0	136049	1.11459
Single	E04	Osimertinib	3.7e-07	DMSO	0	143293	1.17394
Single	E05	Osimertinib	1.23e-07	DMSO	0	147686	1.20993
Single	E06	Osimertinib	4.12e-08	DMSO	0	142355	1.16625
Single	E07	Lucitanib	1e-05	DMSO	0	137698	1.1281
Single	E08	Lucitanib	3.33e-06	DMSO	0	126637	1.03748
Single	E09	Lucitanib	1.11e-06	DMSO	0	135094	1.10677
Single	E10	Lucitanib	3.7e-07	DMSO	0	135570	1.11067
Single	E11	Lucitanib	1.23e-07	DMSO	0	122311	1.00204
Single	E12	Lucitanib	4.12e-08	DMSO	0	138335	1.13332
Single	E13	Cobimetinib	1e-05	DMSO	0	9833	0.0805574
Single	E14	Cobimetinib	3.33e-06	DMSO	0	24861	0.203675
Single	E15	Cobimetinib	1.11e-06	DMSO	0	30797	0.252306
Single	E16	Cobimetinib	3.7e-07	DMSO	0	48564	0.397863
Single	E17	Cobimetinib	1.23e-07	DMSO	0	87334	0.715489
Single	E18	Cobimetinib	4.12e-08	DMSO	0	147192	1.20588
Single	E19	Idelalisib	1e-05	DMSO	0	118748	0.97285
Single	E20	Idelalisib	3.33e-06	DMSO	0	129261	1.05898
Single	E21	Idelalisib	1.11e-06	DMSO	0	121398	0.99456
Single	E22	Idelalisib	3.7e-07	DMSO	0	128468	1.05248
Single	E23	Idelalisib	1.23e-07	DMSO	0	134692	1.10347
Single	E24	Idelalisib	4.12e-08	DMSO	0	147328	1.20699
Single	F01	Navitoclax	1e-05	DMSO	0	79042	0.647556
Single	F02	Navitoclax	3.33e-06	DMSO	0	120967	0.991029
Single	F03	Navitoclax	1.11e-06	DMSO	0	126585	1.03705
Single	F04	Navitoclax	3.7e-07	DMSO	0	136716	1.12005
Single	F05	Navitoclax	1.23e-07	DMSO	0	130707	1.07082
Single	F06	Navitoclax	4.12e-08	DMSO	0	114984	0.942013
Single	F07	Dovitinib	1e-05	DMSO	0	126770	1.03857
Single	F08	Dovitinib	3.33e-06	DMSO	0	137195	1.12398
Single	F09	Dovitinib	1.11e-06	DMSO	0	123148	1.0089
Single	F10	Dovitinib	3.7e-07	DMSO	0	126335	1.03501
Single	F11	Dovitinib	1.23e-07	DMSO	0	126731	1.03825
Single	F12	Dovitinib	4.12e-08	DMSO	0	135673	1.11151
Single	F13	Trametinib	1e-05	DMSO	0	37220	0.304927
Single	F14	Trametinib	3.33e-06	DMSO	0	90254	0.739411
Single	F15	Trametinib	1.11e-06	DMSO	0	92936	0.761384
Single	F16	Trametinib	3.7e-07	DMSO	0	82222	0.673608
Single	F17	Trametinib	1.23e-07	DMSO	0	72078	0.590503
Single	F18	Trametinib	4.12e-08	DMSO	0	58089	0.475897
Single	F19	Taselisib	1e-05	DMSO	0	37068	0.303682
Single	F20	Taselisib	3.33e-06	DMSO	0	39386	0.322672
Single	F21	Taselisib	1.11e-06	DMSO	0	54149	0.443619
Single	F22	Taselisib	3.7e-07	DMSO	0	59986	0.491439
Single	F23	Taselisib	1.23e-07	DMSO	0	98645	0.808155
Single	F24	Taselisib	4.12e-08	DMSO	0	138185	1.13209
Single	G01	Axitinib	1e-05	DMSO	0	121302	0.993774
Single	G02	Axitinib	3.33e-06	DMSO	0	127946	1.04821
Single	G03	Axitinib	1.11e-06	DMSO	0	134483	1.10176
Single	G04	Axitinib	3.7e-07	DMSO	0	145294	1.19033
Single	G05	Axitinib	1.23e-07	DMSO	0	136638	1.11941
Single	G06	Axitinib	4.12e-08	DMSO	0	134941	1.10551
Single	G07	Quizartinib	1e-05	DMSO	0	140422	1.15042
Single	G08	Quizartinib	3.33e-06	DMSO	0	133090	1.09035
Single	G09	Quizartinib	1.11e-06	DMSO	0	144076	1.18035
Single	G10	Quizartinib	3.7e-07	DMSO	0	122593	1.00435
Single	G11	Quizartinib	1.23e-07	DMSO	0	125560	1.02866
Single	G12	Quizartinib	4.12e-08	DMSO	0	119999	0.983099
Single	G13	Cabozantinib	1e-05	DMSO	0	126798	1.0388
Single	G14	Cabozantinib	3.33e-06	DMSO	0	123807	1.0143
Single	G15	Cabozantinib	1.11e-06	DMSO	0	122480	1.00342
Single	G16	Cabozantinib	3.7e-07	DMSO	0	120458	0.986859
Single	G17	Cabozantinib	1.23e-07	DMSO	0	121570	0.995969
Single	G18	Cabozantinib	4.12e-08	DMSO	0	118921	0.974267
Single	G19	Rigosertib	1e-05	DMSO	0	2992	0.0245121
Single	G20	Rigosertib	3.33e-06	DMSO	0	7901	0.0647294
Single	G21	Rigosertib	1.11e-06	DMSO	0	12873	0.105463
Single	G22	Rigosertib	3.7e-07	DMSO	0	30958	0.253625
Single	G23	Rigosertib	1.23e-07	DMSO	0	49644	0.406711
Single	G24	Rigosertib	4.12e-08	DMSO	0	71615	0.58671
Single	H01	Dasatinib	1e-05	DMSO	0	22408	0.183579
Single	H02	Dasatinib	3.33e-06	DMSO	0	26102	0.213842
Single	H03	Dasatinib	1.11e-06	DMSO	0	38483	0.315274
Single	H04	Dasatinib	3.7e-07	DMSO	0	87090	0.71349
Single	H05	Dasatinib	1.23e-07	DMSO	0	122806	1.0061
Single	H06	Dasatinib	4.12e-08	DMSO	0	117835	0.96537
Single	H07	Vorinostat	1e-05	DMSO	0	116309	0.952868
Single	H08	Vorinostat	3.33e-06	DMSO	0	144385	1.18288
Single	H09	Vorinostat	1.11e-06	DMSO	0	112220	0.919369
Single	H10	Vorinostat	3.7e-07	DMSO	0	119875	0.982083
Single	H11	Vorinostat	1.23e-07	DMSO	0	123827	1.01446
Single	H12	Vorinostat	4.12e-08	DMSO	0	126742	1.03834
Single	H13	Everolimus	1e-05	DMSO	0	69406	0.568613
Single	H14	Everolimus	3.33e-06	DMSO	0	64491	0.528346
Single	H15	Everolimus	1.11e-06	DMSO	0	77441	0.63444
Single	H16	Everolimus	3.7e-07	DMSO	0	91354	0.748423
Single	H17	Everolimus	1.23e-07	DMSO	0	105374	0.863283
Single	H18	Everolimus	4.12e-08	DMSO	0	129535	1.06122
Single	H19	Megestrol	1e-05	DMSO	0	104582	0.856794
Single	H20	Megestrol	3.33e-06	DMSO	0	116953	0.958144
Single	H21	Megestrol	1.11e-06	DMSO	0	111146	0.91057
Single	H22	Megestrol	3.7e-07	DMSO	0	114971	0.941907
Single	H23	Megestrol	1.23e-07	DMSO	0	133289	1.09198
Single	H24	Megestrol	4.12e-08	DMSO	0	116174	0.951762
Single	I01	Dabrafenib	1e-05	DMSO	0	116866	0.957431
Single	I02	Dabrafenib	3.33e-06	DMSO	0	141659	1.16055
Single	I03	Dabrafenib	1.11e-06	DMSO	0	158295	1.29684
Single	I04	Dabrafenib	3.7e-07	DMSO	0	158420	1.29787
Single	I05	Dabrafenib	1.23e-07	DMSO	0	157673	1.29175
Single	I06	Dabrafenib	4.12e-08	DMSO	0	139598	1.14366
Single	I07	Belinostat	1e-05	DMSO	0	16369	0.134104
Single	I08	Belinostat	3.33e-06	DMSO	0	88629	0.726098
Single	I09	Belinostat	1.11e-06	DMSO	0	119211	0.976643
Single	I10	Belinostat	3.7e-07	DMSO	0	133699	1.09534
Single	I11	Belinostat	1.23e-07	DMSO	0	132940	1.08912
Single	I12	Belinostat	4.12e-08	DMSO	0	120360	0.986056
Single	I13	Tamoxifen	1e-05	DMSO	0	109582	0.897757
Single	I14	Tamoxifen	3.33e-06	DMSO	0	102710	0.841458
Single	I15	Tamoxifen	1.11e-06	DMSO	0	112780	0.923957
Single	I16	Tamoxifen	3.7e-07	DMSO	0	122300	1.00195
Single	I17	Tamoxifen	1.23e-07	DMSO	0	115046	0.942521
Single	I18	Tamoxifen	4.12e-08	DMSO	0	108866	0.891891
Single	I19	Sunitinib	1e-05	DMSO	0	108511	0.888983
Single	I20	Sunitinib	3.33e-06	DMSO	0	98577	0.807598
Single	I21	Sunitinib	1.11e-06	DMSO	0	108253	0.886869
Single	I22	Sunitinib	3.7e-07	DMSO	0	106567	0.873056
Single	I23	Sunitinib	1.23e-07	DMSO	0	104572	0.856712
Single	I24	Sunitinib	4.12e-08	DMSO	0	122822	1.00623
Single	J01	Vemurafenib	1e-05	DMSO	0	147631	1.20948
Single	J02	Vemurafenib	3.33e-06	DMSO	0	158376	1.2975
Single	J03	Vemurafenib	1.11e-06	DMSO	0	131240	1.07519
Single	J04	Vemurafenib	3.7e-07	DMSO	0	127488	1.04445
Single	J05	Vemurafenib	1.23e-07	DMSO	0	112795	0.92408
Single	J06	Vemurafenib	4.12e-08	DMSO	0	124755	1.02206
Single	J19	Vismodegib	1e-05	DMSO	0	120597	0.987998
Single	J20	Vismodegib	3.33e-06	DMSO	0	117953	0.966337
Single	J21	Vismodegib	1.11e-06	DMSO	0	124058	1.01635
Single	J22	Vismodegib	3.7e-07	DMSO	0	118972	0.974685
Single	J23	Vismodegib	1.23e-07	DMSO	0	125678	1.02962
Single	J24	Vismodegib	4.12e-08	DMSO	0	138952	1.13837
Single	K01	Ibrutinib	1e-05	DMSO	0	127697	1.04617
Single	K02	Ibrutinib	3.33e-06	DMSO	0	180569	1.47932
Single	K03	Ibrutinib	1.11e-06	DMSO	0	164765	1.34985
Single	K04	Ibrutinib	3.7e-07	DMSO	0	162252	1.32926
Single	K05	Ibrutinib	1.23e-07	DMSO	0	142499	1.16743
Single	K06	Ibrutinib	4.12e-08	DMSO	0	134651	1.10314
Single	K07	BMS-754807	1e-05	DMSO	0	24718	0.202504
Single	K08	BMS-754807	3.33e-06	DMSO	0	34137	0.279669
Single	K09	BMS-754807	1.11e-06	DMSO	0	63290	0.518507
Single	K10	BMS-754807	3.7e-07	DMSO	0	113133	0.926849
Single	K11	BMS-754807	1.23e-07	DMSO	0	120933	0.990751
Single	K12	BMS-754807	4.12e-08	DMSO	0	129503	1.06096
Single	K13	MK2206	1e-05	DMSO	0	122124	1.00051
Single	K14	MK2206	3.33e-06	DMSO	0	121828	0.998083
Single	K15	MK2206	1.11e-06	DMSO	0	106217	0.870189
Single	K16	MK2206	3.7e-07	DMSO	0	123716	1.01355
Single	K17	MK2206	1.23e-07	DMSO	0	124251	1.01793
Single	K18	MK2206	4.12e-08	DMSO	0	122962	1.00737
Single	K19	Imatinib	1e-05	DMSO	0	87065	0.713285
Single	K20	Imatinib	3.33e-06	DMSO	0	91644	0.750799
Single	K21	Imatinib	1.11e-06	DMSO	0	92046	0.754092
Single	K22	Imatinib	3.7e-07	DMSO	0	96900	0.793859
Single	K23	Imatinib	1.23e-07	DMSO	0	101707	0.83324
Single	K24	Imatinib	4.12e-08	DMSO	0	120294	0.985516
Single	L01	Celecoxib	1e-05	DMSO	0	132270	1.08363
Single	L02	Celecoxib	3.33e-06	DMSO	0	144381	1.18285
Single	L03	Celecoxib	1.11e-06	DMSO	0	125664	1.02951
Single	L04	Celecoxib	3.7e-07	DMSO	0	113542	0.930199
Single	L05	Celecoxib	1.23e-07	DMSO	0	106751	0.874564
Single	L06	Celecoxib	4.12e-08	DMSO	0	123412	1.01106
Single	L07	Lapatinib	1e-05	DMSO	0	118177	0.968172
Single	L08	Lapatinib	3.33e-06	DMSO	0	119733	0.98092
Single	L09	Lapatinib	1.11e-06	DMSO	0	116777	0.956702
Single	L10	Lapatinib	3.7e-07	DMSO	0	107707	0.882396
Single	L11	Lapatinib	1.23e-07	DMSO	0	108760	0.891023
Single	L12	Lapatinib	4.12e-08	DMSO	0	102172	0.83705
Single	L13	Buparlisib	1e-05	DMSO	0	17094	0.140044
Single	L14	Buparlisib	3.33e-06	DMSO	0	42268	0.346283
Single	L15	Buparlisib	1.11e-06	DMSO	0	110389	0.904368
Single	L16	Buparlisib	3.7e-07	DMSO	0	123626	1.01281
Single	L17	Buparlisib	1.23e-07	DMSO	0	125178	1.02553
Single	L18	Buparlisib	4.12e-08	DMSO	0	116065	0.950869
Single	L19	Cediranib	1e-05	DMSO	0	110787	0.907629
Single	L20	Cediranib	3.33e-06	DMSO	0	107413	0.879987
Single	L21	Cediranib	1.11e-06	DMSO	0	105727	0.866175
Single	L22	Cediranib	3.7e-07	DMSO	0	107183	0.878103
Single	L23	Cediranib	1.23e-07	DMSO	0	108061	0.885296
Single	L24	Cediranib	4.12e-08	DMSO	0	120285	0.985442
Single	M01	Dactolisib	1e-05	DMSO	0	73079	0.598704
Single	M02	Dactolisib	3.33e-06	DMSO	0	134332	1.10052
Single	M03	Dactolisib	1.11e-06	DMSO	0	150980	1.23691
Single	M04	Dactolisib	3.7e-07	DMSO	0	152373	1.24832
Single	M05	Dactolisib	1.23e-07	DMSO	0	142132	1.16442
Single	M06	Dactolisib	4.12e-08	DMSO	0	121162	0.992627
Single	M07	Ruxolitinib	1e-05	DMSO	0	114918	0.941472
Single	M08	Ruxolitinib	3.33e-06	DMSO	0	124910	1.02333
Single	M09	Ruxolitinib	1.11e-06	DMSO	0	113231	0.927652
Single	M10	Ruxolitinib	3.7e-07	DMSO	0	118831	0.97353
Single	M11	Ruxolitinib	1.23e-07	DMSO	0	120078	0.983746
Single	M12	Ruxolitinib	4.12e-08	DMSO	0	120727	0.989063
Single	M13	Olaparib	1e-05	DMSO	0	122543	1.00394
Single	M14	Olaparib	3.33e-06	DMSO	0	113750	0.931903
Single	M15	Olaparib	1.11e-06	DMSO	0	117542	0.96297
Single	M16	Olaparib	3.7e-07	DMSO	0	115237	0.944086
Single	M17	Olaparib	1.23e-07	DMSO	0	118370	0.969753
Single	M18	Olaparib	4.12e-08	DMSO	0	119725	0.980854
Single	M19	Vandetanib	1e-05	DMSO	0	2189	0.0179335
Single	M20	Vandetanib	3.33e-06	DMSO	0	77941	0.638536
Single	M21	Vandetanib	1.11e-06	DMSO	0	117693	0.964207
Single	M22	Vandetanib	3.7e-07	DMSO	0	137722	1.1283
Single	M23	Vandetanib	1.23e-07	DMSO	0	126481	1.0362
Single	M24	Vandetanib	4.12e-08	DMSO	0	133930	1.09723
Single	N01	Erlotinib	1e-05	DMSO	0	95783	0.784708
Single	N02	Erlotinib	3.33e-06	DMSO	0	94752	0.776261
Single	N03	Erlotinib	1.11e-06	DMSO	0	120209	0.984819
Single	N04	Erlotinib	3.7e-07	DMSO	0	124399	1.01915
Single	N05	Erlotinib	1.23e-07	DMSO	0	129048	1.05723
Single	N06	Erlotinib	4.12e-08	DMSO	0	124059	1.01636
Single	N07	Palbociclib	1e-05	DMSO	0	124599	1.02078
Single	N08	Palbociclib	3.33e-06	DMSO	0	134328	1.10049
Single	N09	Palbociclib	1.11e-06	DMSO	0	140686	1.15258
Single	N10	Palbociclib	3.7e-07	DMSO	0	123589	1.01251
Single	N11	Palbociclib	1.23e-07	DMSO	0	118720	0.97262
Single	N12	Palbociclib	4.12e-08	DMSO	0	104434	0.855582
Single	N13	Rucaparib	1e-05	DMSO	0	111706	0.915158
Single	N14	Rucaparib	3.33e-06	DMSO	0	112617	0.922621
Single	N15	Rucaparib	1.11e-06	DMSO	0	113811	0.932403
Single	N16	Rucaparib	3.7e-07	DMSO	0	121440	0.994904
Single	N17	Rucaparib	1.23e-07	DMSO	0	124026	1.01609
Single	N18	Rucaparib	4.12e-08	DMSO	0	124233	1.01779
Single	N19	AZD1775	1e-05	DMSO	0	71687	0.5873
Single	N20	AZD1775	3.33e-06	DMSO	0	54940	0.450099
Single	N21	AZD1775	1.11e-06	DMSO	0	90538	0.741738
Single	N22	AZD1775	3.7e-07	DMSO	0	131034	1.0735
Single	N23	AZD1775	1.23e-07	DMSO	0	109313	0.895553
Single	N24	AZD1775	4.12e-08	DMSO	0	131042	1.07357
Single	O07	Pazopanib	1e-05	DMSO	0	138108	1.13146
Single	O08	Pazopanib	3.33e-06	DMSO	0	127580	1.04521
Single	O09	Pazopanib	1.11e-06	DMSO	0	140372	1.15001
Single	O10	Pazopanib	3.7e-07	DMSO	0	136737	1.12023
Single	O11	Pazopanib	1.23e-07	DMSO	0	110654	0.906539
Single	O12	Pazopanib	4.12e-08	DMSO	0	124491	1.0199
Single	O13	Veliparib	1e-05	DMSO	0	129475	1.06073
Single	O14	Veliparib	3.33e-06	DMSO	0	136843	1.12109
Single	O15	Veliparib	1.11e-06	DMSO	0	142896	1.17068
Single	O16	Veliparib	3.7e-07	DMSO	0	132491	1.08544
Single	O17	Veliparib	1.23e-07	DMSO	0	137072	1.12297
Single	O18	Veliparib	4.12e-08	DMSO	0	84832	0.694991
Single	O19	Poziotinib	1e-05	DMSO	0	66559	0.545288
Single	O20	Poziotinib	3.33e-06	DMSO	0	67639	0.554136
Single	O21	Poziotinib	1.11e-06	DMSO	0	77687	0.636455
Single	O22	Poziotinib	3.7e-07	DMSO	0	76447	0.626296
Single	O23	Poziotinib	1.23e-07	DMSO	0	85666	0.701824
Single	O24	Poziotinib	4.12e-08	DMSO	0	114166	0.935312
Single	C01	Busulfan	5e-06	DMSO	0	151440	1.48764
Single	C02	Busulfan	1.25e-06	DMSO	0	149165	1.46529
Single	C03	Busulfan	3.13e-07	DMSO	0	141494	1.38994
Single	C04	Busulfan	7.81e-08	DMSO	0	134402	1.32027
Single	C05	Busulfan	1.95e-08	DMSO	0	136640	1.34225
Single	C06	Busulfan	4.88e-09	DMSO	0	94243	0.925775
Single	C07	Doxorubicin	5e-06	DMSO	0	1515	0.0148823
Single	C08	Doxorubicin	1.25e-06	DMSO	0	57086	0.560772
Single	C09	Doxorubicin	3.13e-07	DMSO	0	98993	0.972436
Single	C10	Doxorubicin	7.81e-08	DMSO	0	102038	1.00235
Single	C11	Doxorubicin	1.95e-08	DMSO	0	143664	1.41125
Single	C12	Doxorubicin	4.88e-09	DMSO	0	124492	1.22292
Single	C13	Allopurinol	5e-06	DMSO	0	112324	1.10339
Single	C14	Allopurinol	1.25e-06	DMSO	0	117241	1.15169
Single	C15	Allopurinol	3.13e-07	DMSO	0	119235	1.17128
Single	C16	Allopurinol	7.81e-08	DMSO	0	129472	1.27184
Single	C17	Allopurinol	1.95e-08	DMSO	0	118888	1.16787
Single	C18	Allopurinol	4.88e-09	DMSO	0	115961	1.13912
Single	D01	Cyclophosphamide	5e-06	DMSO	0	139301	1.36839
Single	D02	Cyclophosphamide	1.25e-06	DMSO	0	135672	1.33274
Single	D03	Cyclophosphamide	3.13e-07	DMSO	0	129654	1.27363
Single	D04	Cyclophosphamide	7.81e-08	DMSO	0	126583	1.24346
Single	D05	Cyclophosphamide	1.95e-08	DMSO	0	123777	1.2159
Single	D06	Cyclophosphamide	4.88e-09	DMSO	0	120156	1.18033
Single	D07	Epirubicin	5e-06	DMSO	0	1505	0.014784
Single	D08	Epirubicin	1.25e-06	DMSO	0	1678	0.0164835
Single	D09	Epirubicin	3.13e-07	DMSO	0	94977	0.932986
Single	D10	Epirubicin	7.81e-08	DMSO	0	135356	1.32964
Single	D11	Epirubicin	1.95e-08	DMSO	0	123630	1.21445
Single	D12	Epirubicin	4.88e-09	DMSO	0	123621	1.21436
Single	D13	Pentostatin	5e-06	DMSO	0	99855	0.980904
Single	D14	Pentostatin	1.25e-06	DMSO	0	113105	1.11106
Single	D15	Pentostatin	3.13e-07	DMSO	0	110348	1.08398
Single	D16	Pentostatin	7.81e-08	DMSO	0	121567	1.19419
Single	D17	Pentostatin	1.95e-08	DMSO	0	121487	1.1934
Single	D18	Pentostatin	4.88e-09	DMSO	0	122934	1.20762
Single	D19	Mitomycin	5e-06	DMSO	0	35837	0.352037
Single	D20	Mitomycin	1.25e-06	DMSO	0	89517	0.87935
Single	D21	Mitomycin	3.13e-07	DMSO	0	116164	1.14111
Single	D22	Mitomycin	7.81e-08	DMSO	0	130261	1.27959
Single	D23	Mitomycin	1.95e-08	DMSO	0	139554	1.37088
Single	D24	Mitomycin	4.88e-09	DMSO	0	139297	1.36835
Single	E01	Temozolomide	5e-06	DMSO	0	135365	1.32973
Single	E02	Temozolomide	1.25e-06	DMSO	0	132045	1.29711
Single	E03	Temozolomide	3.13e-07	DMSO	0	128273	1.26006
Single	E04	Temozolomide	7.81e-08	DMSO	0	132077	1.29743
Single	E05	Temozolomide	1.95e-08	DMSO	0	115290	1.13253
Single	E06	Temozolomide	4.88e-09	DMSO	0	129117	1.26835
Single	E07	Ethinyl estradiol	5e-06	DMSO	0	124930	1.22722
Single	E08	Ethinyl estradiol	1.25e-06	DMSO	0	124520	1.22319
Single	E09	Ethinyl estradiol	3.13e-07	DMSO	0	124742	1.22538
Single	E10	Ethinyl estradiol	7.81e-08	DMSO	0	114913	1.12882
Single	E11	Ethinyl estradiol	1.95e-08	DMSO	0	119608	1.17494
Single	E12	Ethinyl estradiol	4.88e-09	DMSO	0	122143	1.19984
Single	E13	Cytarabine	5e-06	DMSO	0	36987	0.363334
Single	E14	Cytarabine	1.25e-06	DMSO	0	88669	0.87102
Single	E15	Cytarabine	3.13e-07	DMSO	0	129971	1.27674
Single	E16	Cytarabine	7.81e-08	DMSO	0	125792	1.23569
Single	E17	Cytarabine	1.95e-08	DMSO	0	124672	1.22469
Single	E18	Cytarabine	4.88e-09	DMSO	0	112857	1.10863
Single	E19	Cisplatin	1.5e-06	DMSO	0	130719	1.31484
Single	E20	Cisplatin	3.75e-07	DMSO	0	104251	1.04861
Single	E21	Cisplatin	9.38e-08	DMSO	0	116000	1.16679
Single	E22	Cisplatin	2.34e-08	DMSO	0	123603	1.24327
Single	E23	Cisplatin	5.86e-09	DMSO	0	125198	1.25931
Single	E24	Cisplatin	1.46e-09	DMSO	0	130902	1.31668
Single	F01	Pemetrexed	5e-06	DMSO	0	120456	1.21161
Single	F02	Pemetrexed	1.25e-06	DMSO	0	127603	1.2835
Single	F03	Pemetrexed	3.13e-07	DMSO	0	134297	1.35083
Single	F04	Pemetrexed	7.81e-08	DMSO	0	123960	1.24686
Single	F05	Pemetrexed	1.95e-08	DMSO	0	138366	1.39176
Single	F06	Pemetrexed	4.88e-09	DMSO	0	132407	1.33182
Single	F07	Cabazitaxel	5e-06	DMSO	0	71651	0.703848
Single	F08	Cabazitaxel	1.25e-06	DMSO	0	73844	0.72539
Single	F09	Cabazitaxel	3.13e-07	DMSO	0	70111	0.68872
Single	F10	Cabazitaxel	7.81e-08	DMSO	0	69993	0.687561
Single	F11	Cabazitaxel	1.95e-08	DMSO	0	94890	0.932131
Single	F12	Cabazitaxel	4.88e-09	DMSO	0	117211	1.1514
Single	F13	Topotecan	5e-06	DMSO	0	43528	0.427588
Single	F14	Topotecan	1.25e-06	DMSO	0	93253	0.91605
Single	F15	Topotecan	3.13e-07	DMSO	0	103987	1.02149
Single	F16	Topotecan	7.81e-08	DMSO	0	124612	1.2241
Single	F17	Topotecan	1.95e-08	DMSO	0	132333	1.29994
Single	F18	Topotecan	4.88e-09	DMSO	0	127358	1.25107
Single	F19	Altretamine	5e-06	DMSO	0	111461	1.09491
Single	F20	Altretamine	1.25e-06	DMSO	0	115870	1.13822
Single	F21	Altretamine	3.13e-07	DMSO	0	125746	1.23524
Single	F22	Altretamine	7.81e-08	DMSO	0	113908	1.11895
Single	F23	Altretamine	1.95e-08	DMSO	0	121896	1.19742
Single	F24	Altretamine	4.88e-09	DMSO	0	129898	1.27602
Single	G01	Pralatrexate	5e-06	DMSO	0	112375	1.10389
Single	G02	Pralatrexate	1.25e-06	DMSO	0	126372	1.24139
Single	G03	Pralatrexate	3.13e-07	DMSO	0	111829	1.09853
Single	G04	Pralatrexate	7.81e-08	DMSO	0	108290	1.06376
Single	G05	Pralatrexate	1.95e-08	DMSO	0	116188	1.14135
Single	G06	Pralatrexate	4.88e-09	DMSO	0	118735	1.16637
Single	G07	Docetaxel	5e-06	DMSO	0	68022	0.668199
Single	G08	Docetaxel	1.25e-06	DMSO	0	66229	0.650586
Single	G09	Docetaxel	3.13e-07	DMSO	0	69471	0.682433
Single	G10	Docetaxel	7.81e-08	DMSO	0	59798	0.587412
Single	G11	Docetaxel	1.95e-08	DMSO	0	82092	0.806413
Single	G12	Docetaxel	4.88e-09	DMSO	0	121309	1.19165
Single	G13	Idarubicin	5e-06	DMSO	0	1136	0.0111592
Single	G14	Idarubicin	1.25e-06	DMSO	0	793	0.00778986
Single	G15	Idarubicin	3.13e-07	DMSO	0	6811	0.0669064
Single	G16	Idarubicin	7.81e-08	DMSO	0	93708	0.92052
Single	G17	Idarubicin	1.95e-08	DMSO	0	113715	1.11705
Single	G18	Idarubicin	4.88e-09	DMSO	0	102689	1.00874
Single	G19	Bleomycin	5e-06	DMSO	0	100354	0.985805
Single	G20	Bleomycin	1.25e-06	DMSO	0	115392	1.13353
Single	G21	Bleomycin	3.13e-07	DMSO	0	126631	1.24393
Single	G22	Bleomycin	7.81e-08	DMSO	0	113706	1.11697
Single	G23	Bleomycin	1.95e-08	DMSO	0	101166	0.993782
Single	G24	Bleomycin	4.88e-09	DMSO	0	106731	1.04845
Single	H01	Methotrexate	5e-06	DMSO	0	112127	1.10145
Single	H02	Methotrexate	1.25e-06	DMSO	0	103392	1.01565
Single	H03	Methotrexate	3.13e-07	DMSO	0	111159	1.09195
Single	H04	Methotrexate	7.81e-08	DMSO	0	118871	1.1677
Single	H05	Methotrexate	1.95e-08	DMSO	0	111129	1.09165
Single	H06	Methotrexate	4.88e-09	DMSO	0	107601	1.05699
Single	H07	Ixabepilone	5e-06	DMSO	0	70334	0.690911
Single	H08	Ixabepilone	1.25e-06	DMSO	0	83455	0.819802
Single	H09	Ixabepilone	3.13e-07	DMSO	0	79052	0.77655
Single	H10	Ixabepilone	7.81e-08	DMSO	0	80918	0.79488
Single	H11	Ixabepilone	1.95e-08	DMSO	0	98968	0.97219
Single	H12	Ixabepilone	4.88e-09	DMSO	0	130939	1.28625
Single	H13	Daunorubicin	5e-06	DMSO	0	1385	0.0136052
Single	H14	Daunorubicin	1.25e-06	DMSO	0	4698	0.0461498
Single	H15	Daunorubicin	3.13e-07	DMSO	0	74566	0.732483
Single	H16	Daunorubicin	7.81e-08	DMSO	0	120100	1.17978
Single	H17	Daunorubicin	1.95e-08	DMSO	0	105664	1.03797
Single	H18	Daunorubicin	4.88e-09	DMSO	0	106600	1.04716
Single	H19	SN-38	5e-06	DMSO	0	79132	0.777336
Single	H20	SN-38	1.25e-06	DMSO	0	87254	0.85712
Single	H21	SN-38	3.13e-07	DMSO	0	87768	0.86217
Single	H22	SN-38	7.81e-08	DMSO	0	92138	0.905097
Single	H23	SN-38	1.95e-08	DMSO	0	124480	1.2228
Single	H24	SN-38	4.88e-09	DMSO	0	120945	1.18808
Single	I01	Fluorouracil	5e-06	DMSO	0	142145	1.39633
Single	I02	Fluorouracil	1.25e-06	DMSO	0	141334	1.38836
Single	I03	Fluorouracil	3.13e-07	DMSO	0	122066	1.19909
Single	I04	Fluorouracil	7.81e-08	DMSO	0	108611	1.06692
Single	I05	Fluorouracil	1.95e-08	DMSO	0	118040	1.15954
Single	I06	Fluorouracil	4.88e-09	DMSO	0	105102	1.03245
Single	I07	Vinorelbine	5e-06	DMSO	0	3164	0.0310809
Single	I08	Vinorelbine	1.25e-06	DMSO	0	22380	0.219845
Single	I09	Vinorelbine	3.13e-07	DMSO	0	36546	0.359002
Single	I10	Vinorelbine	7.81e-08	DMSO	0	81516	0.800754
Single	I11	Vinorelbine	1.95e-08	DMSO	0	86969	0.854321
Single	I12	Vinorelbine	4.88e-09	DMSO	0	117909	1.15825
Single	I13	Etoposide	5e-06	DMSO	0	91556	0.89938
Single	I14	Etoposide	1.25e-06	DMSO	0	99140	0.97388
Single	I15	Etoposide	3.13e-07	DMSO	0	125195	1.22983
Single	I16	Etoposide	7.81e-08	DMSO	0	114278	1.12258
Single	I17	Etoposide	1.95e-08	DMSO	0	113069	1.11071
Single	I18	Etoposide	4.88e-09	DMSO	0	103407	1.0158
Single	J01	Gemcitabine	5e-06	DMSO	0	43895	0.431193
Single	J02	Gemcitabine	1.25e-06	DMSO	0	40852	0.401301
Single	J03	Gemcitabine	3.13e-07	DMSO	0	41297	0.405672
Single	J04	Gemcitabine	7.81e-08	DMSO	0	36212	0.355721
Single	J05	Gemcitabine	1.95e-08	DMSO	0	35707	0.35076
Single	J06	Gemcitabine	4.88e-09	DMSO	0	54620	0.536548
Single	J07	Vinblastine	5e-06	DMSO	0	2897	0.028458
Single	J08	Vinblastine	1.25e-06	DMSO	0	17646	0.173342
Single	J09	Vinblastine	3.13e-07	DMSO	0	35296	0.346722
Single	J10	Vinblastine	7.81e-08	DMSO	0	73189	0.718956
Single	J11	Vinblastine	1.95e-08	DMSO	0	83395	0.819212
Single	J12	Vinblastine	4.88e-09	DMSO	0	121018	1.18879
Single	J13	Paclitaxel	5e-06	DMSO	0	76591	0.752375
Single	J14	Paclitaxel	1.25e-06	DMSO	0	85164	0.83659
Single	J15	Paclitaxel	3.13e-07	DMSO	0	109830	1.07889
Single	J16	Paclitaxel	7.81e-08	DMSO	0	115424	1.13384
Single	J17	Paclitaxel	1.95e-08	DMSO	0	114060	1.12044
Single	J18	Paclitaxel	4.88e-09	DMSO	0	117166	1.15095
Single	K01	Vincristine	5e-06	DMSO	0	2568	0.0252262
Single	K02	Vincristine	1.25e-06	DMSO	0	6951	0.0682816
Single	K03	Vincristine	3.13e-07	DMSO	0	29047	0.285337
Single	K04	Vincristine	7.81e-08	DMSO	0	38726	0.380416
Single	K05	Vincristine	1.95e-08	DMSO	0	59961	0.589014
Single	K06	Vincristine	4.88e-09	DMSO	0	70347	0.691038
Single	K07	Carfilzomib	5e-06	DMSO	0	1088	0.0106877
Single	K08	Carfilzomib	1.25e-06	DMSO	0	831	0.00816315
Single	K09	Carfilzomib	3.13e-07	DMSO	0	988	0.0097054
Single	K10	Carfilzomib	7.81e-08	DMSO	0	6913	0.0679083
Single	K11	Carfilzomib	1.95e-08	DMSO	0	104990	1.03135
Single	K12	Carfilzomib	4.88e-09	DMSO	0	102335	1.00527
Single	K13	Hydroxyurea	5e-06	DMSO	0	102955	1.01136
Single	K14	Hydroxyurea	1.25e-06	DMSO	0	109235	1.07305
Single	K15	Hydroxyurea	3.13e-07	DMSO	0	106751	1.04864
Single	K16	Hydroxyurea	7.81e-08	DMSO	0	107089	1.05197
Single	K17	Hydroxyurea	1.95e-08	DMSO	0	105622	1.03755
Single	K18	Hydroxyurea	4.88e-09	DMSO	0	100393	0.986188
Single	B01	Afuresertib	1e-05	DMSO	0	37464	0.379438
Single	B02	Afuresertib	3.33e-06	DMSO	0	68091	0.68963
Single	B03	Afuresertib	1.11e-06	DMSO	0	96655	0.978929
Single	B04	Afuresertib	3.7e-07	DMSO	0	120656	1.22201
Single	B05	Afuresertib	1.23e-07	DMSO	0	115359	1.16836
Single	B06	Afuresertib	4.12e-08	DMSO	0	117354	1.18857
Single	B13	Linsitinib	1e-05	DMSO	0	4089	0.0414137
Single	B14	Linsitinib	3.33e-06	DMSO	0	93761	0.949618
Single	B15	Linsitinib	1.11e-06	DMSO	0	104368	1.05705
Single	B16	Linsitinib	3.7e-07	DMSO	0	114690	1.16159
Single	B17	Linsitinib	1.23e-07	DMSO	0	105645	1.06998
Single	B18	Linsitinib	4.12e-08	DMSO	0	96820	0.9806
Single	B19	AZD5363	1e-05	DMSO	0	73107	0.740433
Single	B20	AZD5363	3.33e-06	DMSO	0	103481	1.04806
Single	B21	AZD5363	1.11e-06	DMSO	0	113574	1.15029
Single	B22	AZD5363	3.7e-07	DMSO	0	115638	1.17119
Single	B23	AZD5363	1.23e-07	DMSO	0	108156	1.09541
Single	B24	AZD5363	4.12e-08	DMSO	0	110838	1.12257
Single	C01	Alisertib	1e-05	DMSO	0	76483	0.774625
Single	C02	Alisertib	3.33e-06	DMSO	0	79802	0.80824
Single	C03	Alisertib	1.11e-06	DMSO	0	80314	0.813426
Single	C04	Alisertib	3.7e-07	DMSO	0	105826	1.07181
Single	C05	Alisertib	1.23e-07	DMSO	0	133279	1.34986
Single	C06	Alisertib	4.12e-08	DMSO	0	132614	1.34312
Single	C07	Capmatinib	4.84e-06	DMSO	0	131811	1.33499
Single	C08	Capmatinib	1.61e-06	DMSO	0	126906	1.28531
Single	C09	Capmatinib	5.38e-07	DMSO	0	112438	1.13878
Single	C10	Capmatinib	1.79e-07	DMSO	0	119522	1.21053
Single	C11	Capmatinib	5.98e-08	DMSO	0	114170	1.15632
Single	C12	Capmatinib	1.99e-08	DMSO	0	125499	1.27106
Single	C13	Momelotinib	1e-05	DMSO	0	117834	1.19343
Single	C14	Momelotinib	3.33e-06	DMSO	0	116618	1.18112
Single	C15	Momelotinib	1.11e-06	DMSO	0	104862	1.06205
Single	C16	Momelotinib	3.7e-07	DMSO	0	108765	1.10158
Single	C17	Momelotinib	1.23e-07	DMSO	0	124156	1.25746
Single	C18	Momelotinib	4.12e-08	DMSO	0	108825	1.10219
Single	C19	GF-109203	1e-05	DMSO	0	125166	1.26769
Single	C20	GF-109203	3.33e-06	DMSO	0	119730	1.21263
Single	C21	GF-109203	1.11e-06	DMSO	0	108603	1.09994
Single	C22	GF-109203	3.7e-07	DMSO	0	115982	1.17467
Single	C23	GF-109203	1.23e-07	DMSO	0	114540	1.16007
Single	C24	GF-109203	4.12e-08	DMSO	0	129501	1.3116
Single	D01	Venetoclax	1e-05	DMSO	0	132985	1.34688
Single	D02	Venetoclax	3.33e-06	DMSO	0	139754	1.41544
Single	D03	Venetoclax	1.11e-06	DMSO	0	115338	1.16815
Single	D04	Venetoclax	3.7e-07	DMSO	0	120236	1.21776
Single	D05	Venetoclax	1.23e-07	DMSO	0	120803	1.2235
Single	D06	Venetoclax	4.12e-08	DMSO	0	123551	1.25133
Single	D07	Pinometostat	1e-05	DMSO	0	117114	1.18614
Single	D08	Pinometostat	3.33e-06	DMSO	0	117658	1.19165
Single	D09	Pinometostat	1.11e-06	DMSO	0	118350	1.19866
Single	D10	Pinometostat	3.7e-07	DMSO	0	109657	1.11061
Single	D11	Pinometostat	1.23e-07	DMSO	0	115551	1.17031
Single	D12	Pinometostat	4.12e-08	DMSO	0	119447	1.20977
Single	D13	Binimetinib	1e-05	DMSO	0	51614	0.52275
Single	D14	Binimetinib	3.33e-06	DMSO	0	61472	0.622593
Single	D15	Binimetinib	1.11e-06	DMSO	0	77134	0.781219
Single	D16	Binimetinib	3.7e-07	DMSO	0	95622	0.968466
Single	D17	Binimetinib	1.23e-07	DMSO	0	106549	1.07914
Single	D18	Binimetinib	4.12e-08	DMSO	0	126203	1.27819
Single	D19	Midostaurin	1e-05	DMSO	0	136785	1.38537
Single	D20	Midostaurin	3.33e-06	DMSO	0	112813	1.14258
Single	D21	Midostaurin	1.11e-06	DMSO	0	108913	1.10308
Single	D22	Midostaurin	3.7e-07	DMSO	0	112917	1.14363
Single	D23	Midostaurin	1.23e-07	DMSO	0	117070	1.18569
Single	D24	Midostaurin	4.12e-08	DMSO	0	114278	1.15742
Single	E01	Sepantronium	1e-05	DMSO	0	1933	0.0195776
Single	E02	Sepantronium	3.33e-06	DMSO	0	71473	0.723884
Single	E03	Sepantronium	1.11e-06	DMSO	0	134626	1.3635
Single	E04	Sepantronium	3.7e-07	DMSO	0	124717	1.26314
Single	E05	Sepantronium	1.23e-07	DMSO	0	113379	1.14831
Single	E06	Sepantronium	4.12e-08	DMSO	0	120667	1.22212
Single	E07	GDC0994	1e-05	DMSO	0	100303	1.01588
Single	E08	GDC0994	3.33e-06	DMSO	0	105791	1.07146
Single	E09	GDC0994	1.11e-06	DMSO	0	117028	1.18527
Single	E10	GDC0994	3.7e-07	DMSO	0	125256	1.2686
Single	E11	GDC0994	1.23e-07	DMSO	0	123125	1.24702
Single	E12	GDC0994	4.12e-08	DMSO	0	119628	1.2116
Single	E13	Temsirolimus	1e-05	DMSO	0	64652	0.6548
Single	E14	Temsirolimus	3.33e-06	DMSO	0	65049	0.658821
Single	E15	Temsirolimus	1.11e-06	DMSO	0	76029	0.770027
Single	E16	Temsirolimus	3.7e-07	DMSO	0	79680	0.807005
Single	E17	Temsirolimus	1.23e-07	DMSO	0	119866	1.21401
Single	E18	Temsirolimus	4.12e-08	DMSO	0	127188	1.28817
Single	E19	Oprozomib	1e-05	DMSO	0	2135	0.0216234
Single	E20	Oprozomib	3.33e-06	DMSO	0	1447	0.0146553
Single	E21	Oprozomib	1.11e-06	DMSO	0	1455	0.0147363
Single	E22	Oprozomib	3.7e-07	DMSO	0	1863	0.0188686
Single	E23	Oprozomib	1.23e-07	DMSO	0	3046	0.0308501
Single	E24	Oprozomib	4.12e-08	DMSO	0	14157	0.143383
Single	F01	CPI-203	1e-05	DMSO	0	40622	0.411422
Single	F02	CPI-203	3.33e-06	DMSO	0	48484	0.491049
Single	F03	CPI-203	1.11e-06	DMSO	0	61789	0.625803
Single	F04	CPI-203	3.7e-07	DMSO	0	77592	0.785857
Single	F05	CPI-203	1.23e-07	DMSO	0	103410	1.04734
Single	F06	CPI-203	4.12e-08	DMSO	0	130422	1.32092
Single	F07	Tazemetostat	1e-05	DMSO	0	109605	1.11009
Single	F08	Tazemetostat	3.33e-06	DMSO	0	104934	1.06278
Single	F09	Tazemetostat	1.11e-06	DMSO	0	110344	1.11757
Single	F10	Tazemetostat	3.7e-07	DMSO	0	116676	1.1817
Single	F11	Tazemetostat	1.23e-07	DMSO	0	106663	1.08029
Single	F12	Tazemetostat	4.12e-08	DMSO	0	112386	1.13825
Single	F13	Toremifene	1e-05	DMSO	0	114037	1.15497
Single	F14	Toremifene	3.33e-06	DMSO	0	119026	1.2055
Single	F15	Toremifene	1.11e-06	DMSO	0	107792	1.09172
Single	F16	Toremifene	3.7e-07	DMSO	0	126809	1.28433
Single	F17	Toremifene	1.23e-07	DMSO	0	125645	1.27254
Single	F18	Toremifene	4.12e-08	DMSO	0	103958	1.05289
Single	F19	Tretinoin	1e-05	DMSO	0	103129	1.0445
Single	F20	Tretinoin	3.33e-06	DMSO	0	121030	1.2258
Single	F21	Tretinoin	1.11e-06	DMSO	0	117488	1.18993
Single	F22	Tretinoin	3.7e-07	DMSO	0	121031	1.22581
Single	F23	Tretinoin	1.23e-07	DMSO	0	119068	1.20593
Single	F24	Tretinoin	4.12e-08	DMSO	0	120566	1.2211
Single	G01	AT7519	1e-05	DMSO	0	4599	0.046579
Single	G02	AT7519	3.33e-06	DMSO	0	120121	1.21659
Single	G03	AT7519	1.11e-06	DMSO	0	123411	1.24992
Single	G04	AT7519	3.7e-07	DMSO	0	134401	1.36122
Single	G05	AT7519	1.23e-07	DMSO	0	128821	1.30471
Single	G06	AT7519	4.12e-08	DMSO	0	102306	1.03616
Single	G07	GSK503	1e-05	DMSO	0	98476	0.997372
Single	G08	GSK503	3.33e-06	DMSO	0	94825	0.960394
Single	G09	GSK503	1.11e-06	DMSO	0	114943	1.16415
Single	G10	GSK503	3.7e-07	DMSO	0	97763	0.99015
Single	G11	GSK503	1.23e-07	DMSO	0	122188	1.23753
Single	G12	GSK503	4.12e-08	DMSO	0	107909	1.09291
Single	G13	Pictilisib	1e-05	DMSO	0	117787	1.19295
Single	G14	Pictilisib	3.33e-06	DMSO	0	105627	1.0698
Single	G15	Pictilisib	1.11e-06	DMSO	0	102940	1.04258
Single	G16	Pictilisib	3.7e-07	DMSO	0	108383	1.09771
Single	G17	Pictilisib	1.23e-07	DMSO	0	110852	1.12272
Single	G18	Pictilisib	4.12e-08	DMSO	0	111467	1.12895
Single	G19	Imiquimod	1e-05	DMSO	0	107894	1.09276
Single	G20	Imiquimod	3.33e-06	DMSO	0	108594	1.09985
Single	G21	Imiquimod	1.11e-06	DMSO	0	106628	1.07994
Single	G22	Imiquimod	3.7e-07	DMSO	0	100886	1.02178
Single	G23	Imiquimod	1.23e-07	DMSO	0	115471	1.1695
Single	G24	Imiquimod	4.12e-08	DMSO	0	119010	1.20534
Single	H01	Abemaciclib	1e-05	DMSO	0	100800	1.02091
Single	H02	Abemaciclib	3.33e-06	DMSO	0	103094	1.04414
Single	H03	Abemaciclib	1.11e-06	DMSO	0	107563	1.08941
Single	H04	Abemaciclib	3.7e-07	DMSO	0	114389	1.15854
Single	H05	Abemaciclib	1.23e-07	DMSO	0	108646	1.10037
Single	H06	Abemaciclib	4.12e-08	DMSO	0	103640	1.04967
Single	H07	Defactinib	9.79e-06	DMSO	0	106832	1.082
Single	H08	Defactinib	3.26e-06	DMSO	0	108060	1.09444
Single	H09	Defactinib	1.09e-06	DMSO	0	95529	0.967524
Single	H10	Defactinib	3.63e-07	DMSO	0	94038	0.952423
Single	H11	Defactinib	1.21e-07	DMSO	0	99520	1.00795
Single	H12	Defactinib	4.03e-08	DMSO	0	94880	0.960951
Single	H13	Talazoparib	1e-05	DMSO	0	82756	0.838159
Single	H14	Talazoparib	3.33e-06	DMSO	0	92300	0.934821
Single	H15	Talazoparib	1.11e-06	DMSO	0	104631	1.05971
Single	H16	Talazoparib	3.7e-07	DMSO	0	127836	1.29473
Single	H17	Talazoparib	1.23e-07	DMSO	0	132976	1.34679
Single	H18	Talazoparib	4.12e-08	DMSO	0	121542	1.23099
Single	H19	Nilotinib	1e-05	DMSO	0	97832	0.990849
Single	H20	Nilotinib	3.33e-06	DMSO	0	101241	1.02538
Single	H21	Nilotinib	1.11e-06	DMSO	0	97845	0.990981
Single	H22	Nilotinib	3.7e-07	DMSO	0	99227	1.00498
Single	H23	Nilotinib	1.23e-07	DMSO	0	115599	1.17079
Single	H24	Nilotinib	4.12e-08	DMSO	0	106824	1.08192
Single	I01	Ribociclib	1e-05	DMSO	0	122350	1.23917
Single	I02	Ribociclib	3.33e-06	DMSO	0	119208	1.20735
Single	I03	Ribociclib	1.11e-06	DMSO	0	118493	1.20011
Single	I04	Ribociclib	3.7e-07	DMSO	0	114053	1.15514
Single	I05	Ribociclib	1.23e-07	DMSO	0	123172	1.24749
Single	I06	Ribociclib	4.12e-08	DMSO	0	105101	1.06447
Single	I07	Erdafitinib	1e-05	DMSO	0	48474	0.490948
Single	I08	Erdafitinib	3.33e-06	DMSO	0	96089	0.973196
Single	I09	Erdafitinib	1.11e-06	DMSO	0	102458	1.0377
Single	I10	Erdafitinib	3.7e-07	DMSO	0	87338	0.884565
Single	I11	Erdafitinib	1.23e-07	DMSO	0	98649	0.999124
Single	I12	Erdafitinib	4.12e-08	DMSO	0	108614	1.10005
Single	I13	GSK2636771	1e-05	DMSO	0	99563	1.00838
Single	I14	GSK2636771	3.33e-06	DMSO	0	109253	1.10652
Single	I15	GSK2636771	1.11e-06	DMSO	0	112818	1.14263
Single	I16	GSK2636771	3.7e-07	DMSO	0	114669	1.16138
Single	I17	GSK2636771	1.23e-07	DMSO	0	115926	1.17411
Single	I18	GSK2636771	4.12e-08	DMSO	0	102978	1.04297
Single	I19	Regorafenib	1e-05	DMSO	0	104917	1.06261
Single	I20	Regorafenib	3.33e-06	DMSO	0	103719	1.05047
Single	I21	Regorafenib	1.11e-06	DMSO	0	111987	1.13421
Single	I22	Regorafenib	3.7e-07	DMSO	0	108674	1.10066
Single	I23	Regorafenib	1.23e-07	DMSO	0	114426	1.15891
Single	I24	Regorafenib	4.12e-08	DMSO	0	117825	1.19334
Single	J01	BML-EI388	1e-05	DMSO	0	108689	1.10081
Single	J02	BML-EI388	3.33e-06	DMSO	0	104642	1.05982
Single	J03	BML-EI388	1.11e-06	DMSO	0	106211	1.07571
Single	J04	BML-EI388	3.7e-07	DMSO	0	108868	1.10262
Single	J05	BML-EI388	1.23e-07	DMSO	0	107548	1.08925
Single	J06	BML-EI388	4.12e-08	DMSO	0	112493	1.13934
Single	J07	Entinostat	1e-05	DMSO	0	7691	0.077895
Single	J08	Entinostat	3.33e-06	DMSO	0	87353	0.884717
Single	J09	Entinostat	1.11e-06	DMSO	0	115782	1.17265
Single	J10	Entinostat	3.7e-07	DMSO	0	90535	0.916945
Single	J11	Entinostat	1.23e-07	DMSO	0	100248	1.01532
Single	J12	Entinostat	4.12e-08	DMSO	0	107415	1.08791
Single	J13	Apitolisib	1e-05	DMSO	0	9493	0.0961458
Single	J14	Apitolisib	3.33e-06	DMSO	0	14823	0.150128
Single	J15	Apitolisib	1.11e-06	DMSO	0	23806	0.241109
Single	J16	Apitolisib	3.7e-07	DMSO	0	46749	0.473477
Single	J17	Apitolisib	1.23e-07	DMSO	0	102151	1.03459
Single	J18	Apitolisib	4.12e-08	DMSO	0	116355	1.17845
Single	J19	Afatinib	1e-05	DMSO	0	50409	0.510546
Single	J20	Afatinib	3.33e-06	DMSO	0	60430	0.612039
Single	J21	Afatinib	1.11e-06	DMSO	0	69597	0.704883
Single	J22	Afatinib	3.7e-07	DMSO	0	71104	0.720146
Single	J23	Afatinib	1.23e-07	DMSO	0	80486	0.815168
Single	J24	Afatinib	4.12e-08	DMSO	0	128709	1.30357
Single	K07	Onalespib	1e-05	DMSO	0	1306	0.0132273
Single	K08	Onalespib	3.33e-06	DMSO	0	1167	0.0118195
Single	K09	Onalespib	1.11e-06	DMSO	0	1720	0.0174203
Single	K10	Onalespib	3.7e-07	DMSO	0	54140	0.548334
Single	K11	Onalespib	1.23e-07	DMSO	0	89603	0.907505
Single	K12	Onalespib	4.12e-08	DMSO	0	105870	1.07226
Single	K13	Duvelisib	1e-05	DMSO	0	75454	0.764203
Single	K14	Duvelisib	3.33e-06	DMSO	0	109885	1.11292
Single	K15	Duvelisib	1.11e-06	DMSO	0	113075	1.14523
Single	K16	Duvelisib	3.7e-07	DMSO	0	111916	1.13349
Single	K17	Duvelisib	1.23e-07	DMSO	0	103596	1.04923
Single	K18	Duvelisib	4.12e-08	DMSO	0	108257	1.09643
Single	J07	DMSO	0	DMSO	0	122145	1.00068
Single	J08	DMSO	0	DMSO	0	114955	0.941775
Single	J09	DMSO	0	DMSO	0	121979	0.99932
Single	J10	DMSO	0	DMSO	0	116372	0.953384
Single	J11	DMSO	0	DMSO	0	127884	1.0477
Single	J12	DMSO	0	DMSO	0	126647	1.03756
Single	L01	DMSO	0	DMSO	0	105968	1.04095
Single	L03	DMSO	0	DMSO	0	110037	1.08092
Single	L04	DMSO	0	DMSO	0	99580	0.978202
Single	L05	DMSO	0	DMSO	0	110218	1.0827
Single	L06	DMSO	0	DMSO	0	99029	0.97279
Single	L07	DMSO	0	DMSO	0	97472	0.957495
Single	L08	DMSO	0	DMSO	0	102241	1.00434
Single	L09	DMSO	0	DMSO	0	92256	0.906256
Single	L10	DMSO	0	DMSO	0	101799	1
Single	L11	DMSO	0	DMSO	0	101256	0.994666
Single	L12	DMSO	0	DMSO	0	103527	1.01697
Single	L13	PBS	0	DMSO	0	98240	0.988151
Single	L14	PBS	0	DMSO	0	95754	0.963146
Single	L15	PBS	0	DMSO	0	100057	1.00643
Single	L16	PBS	0	DMSO	0	94198	0.947494
Single	L17	PBS	0	DMSO	0	99770	1.00354
Single	L18	PBS	0	DMSO	0	99796	1.0038
Single	L19	PBS	0	DMSO	0	101644	1.02239
Single	L20	PBS	0	DMSO	0	99066	0.996459
Single	L21	PBS	0	DMSO	0	95675	0.962351
Single	L22	PBS	0	DMSO	0	100427	1.01015
Single	L23	PBS	0	DMSO	0	95084	0.956406
Single	L24	PBS	0	DMSO	0	100241	1.00828
Single	L07	DMSO	0	DMSO	0	101653	1.02955
Single	L08	DMSO	0	DMSO	0	98559	0.998212
Single	L09	DMSO	0	DMSO	0	93129	0.943217
Single	L10	DMSO	0	DMSO	0	103705	1.05033
Single	L11	DMSO	0	DMSO	0	95672	0.968973
Single	L12	DMSO	0	DMSO	0	100378	1.01664
Single	L13	DMSO	0	DMSO	0	98912	1.00179
Single	L14	DMSO	0	DMSO	0	101323	1.02621
Single	L15	DMSO	0	DMSO	0	97167	0.984114
Single	L16	DMSO	0	DMSO	0	102175	1.03484
Single	L17	DMSO	0	DMSO	0	97596	0.988459
Single	L18	DMSO	0	DMSO	0	98108	0.993645
Single	A02	Bortezomib	1e-05	DMSO	0	831	0.00680802
Single	A04	Bortezomib	1e-05	DMSO	0	122	0.000999492
Single	A12	Bortezomib	1e-05	DMSO	0	848	0.00694729
Single	A14	Bortezomib	1e-05	DMSO	0	1591	0.0130344
Single	J13	Bortezomib	1e-05	DMSO	0	2088	0.0171061
Single	J14	Bortezomib	3.33e-06	DMSO	0	1486	0.0121741
Single	J15	Bortezomib	1.11e-06	DMSO	0	1459	0.0119529
Single	J16	Bortezomib	3.7e-07	DMSO	0	1734	0.0142059
Single	J17	Bortezomib	1.23e-07	DMSO	0	1856	0.0152054
Single	J18	Bortezomib	4.12e-08	DMSO	0	2381	0.0195065
Single	P02	Bortezomib	1e-05	DMSO	0	1298	0.0106339
Single	P04	Bortezomib	1e-05	DMSO	0	684	0.00560371
Single	P12	Bortezomib	1e-05	DMSO	0	2230	0.0182694
Single	P14	Bortezomib	1e-05	DMSO	0	2401	0.0196703
Single	A02	Bortezomib	1e-05	DMSO	0	2031	0.0199511
Single	A04	Bortezomib	1e-05	DMSO	0	798	0.00783898
Single	A12	Bortezomib	1e-05	DMSO	0	153	0.00150296
Single	A14	Bortezomib	5e-06	DMSO	0	1039	0.0102064
Single	I19	Bortezomib	5e-06	DMSO	0	1217	0.0119549
Single	I20	Bortezomib	1.25e-06	DMSO	0	739	0.0072594
Single	I21	Bortezomib	3.13e-07	DMSO	0	954	0.00937141
Single	I22	Bortezomib	7.81e-08	DMSO	0	995	0.00977416
Single	I23	Bortezomib	1.95e-08	DMSO	0	1532	0.0150493
Single	I24	Bortezomib	4.88e-09	DMSO	0	1807	0.0177507
Single	J19	Bortezomib	5e-06	DMSO	0	806	0.00791756
Single	J20	Bortezomib	1.25e-06	DMSO	0	329	0.00323186
Single	J21	Bortezomib	3.13e-07	DMSO	0	560	0.00550104
Single	J22	Bortezomib	7.81e-08	DMSO	0	645	0.00633602
Single	J23	Bortezomib	1.95e-08	DMSO	0	1161	0.0114048
Single	J24	Bortezomib	4.88e-09	DMSO	0	41964	0.412224
Single	K19	Bortezomib	5e-06	DMSO	0	1346	0.0132221
Single	K20	Bortezomib	1.25e-06	DMSO	0	786	0.0077211
Single	K21	Bortezomib	3.13e-07	DMSO	0	1048	0.0102948
Single	K22	Bortezomib	7.81e-08	DMSO	0	1224	0.0120237
Single	K23	Bortezomib	1.95e-08	DMSO	0	1931	0.0189688
Single	K24	Bortezomib	4.88e-09	DMSO	0	85815	0.842985
Single	P02	Bortezomib	1e-05	DMSO	0	1294	0.0127113
Single	P04	Bortezomib	1e-05	DMSO	0	672	0.00660124
Single	P12	Bortezomib	1e-05	DMSO	0	1266	0.0124363
Single	P14	Bortezomib	5e-06	DMSO	0	1388	0.0136347
Single	A02	Bortezomib	1e-05	DMSO	0	1565	0.0158504
Single	A04	Bortezomib	1e-05	DMSO	0	1796	0.01819
Single	A12	Bortezomib	1e-05	DMSO	0	1953	0.0197801
Single	A14	Bortezomib	1e-05	DMSO	0	1134	0.0114852
Single	K19	Bortezomib	1e-05	DMSO	0	994	0.0100673
Single	K20	Bortezomib	3.33e-06	DMSO	0	590	0.00597556
Single	K21	Bortezomib	1.11e-06	DMSO	0	701	0.00709978
Single	K22	Bortezomib	3.7e-07	DMSO	0	680	0.00688709
Single	K23	Bortezomib	1.23e-07	DMSO	0	815	0.00825438
Single	K24	Bortezomib	4.12e-08	DMSO	0	931	0.00942923
Single	L19	Bortezomib	1e-05	DMSO	0	1206	0.0122145
Single	L20	Bortezomib	3.33e-06	DMSO	0	744	0.00753528
Single	L21	Bortezomib	1.11e-06	DMSO	0	776	0.00785938
Single	L22	Bortezomib	3.7e-07	DMSO	0	791	0.0080113
Single	L23	Bortezomib	1.23e-07	DMSO	0	1034	0.0104724
Single	L24	Bortezomib	4.12e-08	DMSO	0	1028	0.0104117
Single	P02	Bortezomib	1e-05	DMSO	0	1694	0.0171569
Single	P04	Bortezomib	1e-05	DMSO	0	1673	0.0169443
Single	P12	Bortezomib	1e-05	DMSO	0	1697	0.0171873
Single	P14	Bortezomib	1e-05	DMSO	0	1841	0.0186458

## Sheet: WT combo stats
Compound	Target_Full	AUC.Single	AUC.Combo	Z.score.Single	Z.score.Combo	Fold.Change	abs.Diff
Erlotinib	EGFR, ALK, JAK2 mutant (JAK2V617F)	0.829135	0.353412	-0.129774	-1.7919	2.34609	0.475723
Gefitinib	EGFR	0.885027	0.427691	0.476576	-1.19315	2.06932	0.457337
GDC0994	ERK1, ERK2	0.800836	0.440275	-0.818726	-2.07931	1.81894	0.36056
Vandetanib	VEGFR2, EGFR, RET	0.466542	0.206197	-1.01157	-1.43691	2.26261	0.260345
Ibrutinib	BTK	0.880088	0.403165	0.228077	-1.13091	2.18295	0.476923
AZD1775	Wee1	0.579303	0.183172	0.0449106	-1.01428	3.16262	0.396131
Dasatinib	Bcr-Abl, Src	0.171097	0.0524429	-1.93195	-1.62957	3.26255	0.118654
Neratinib	EGFR, HER1, HER2, HER4	1.15294	0.48268	1.5313	-0.76514	2.38863	0.670263
BMS-754807	IGF-1R, InsR	0.713405	0.220049	0.64414	-0.67997	3.24203	0.493356
Pictilisib	PI3Kα, PI3Kδ	0.942956	0.593884	0.573579	-1.39685	1.58778	0.349072
Alpelisib	PI3K p110α	0.862133	0.478542	0.16703	-1.02643	1.80158	0.383591
Binimetinib	Mek	0.326938	0.180193	-1.52723	-1.4429	1.81437	0.146744
CPI-0610	BET proteins - BRD2, BRD3, BRD4, BRDT	0.757355	0.443368	-0.208973	-1.13484	1.70819	0.313987
Isotretinoin	speculated to affect telomerase enzyme hTERT	0.893352	0.623185	-0.579176	-1.75603	1.43353	0.270167
Poziotinib	EGFR, HER2, HER4	0.39037	0.19884	-1.09698	-1.14008	1.96324	0.19153
Everolimus	mTORC1	0.333037	0.172989	-1.24199	-1.1687	1.92519	0.160048
MK2206	Akt1, Akt2, Akt3	0.950253	0.49462	0.237761	-0.650409	1.92118	0.455633
AZD5363	Akt	0.837341	0.559605	-0.260097	-1.16921	1.49631	0.277735
Taselisib	PIK3CA	0.319709	0.130801	-0.714606	-0.747391	2.44424	0.188908
Ceritinib	ALK, IGF-1R, ROS1	0.819081	0.56921	-0.341418	-1.32209	1.43898	0.249871
Buparlisib	Pan-class I PI3K	0.81058	0.382999	0.214985	-0.447153	2.1164	0.427582
Cobimetinib	MEK	0.0990764	0.0464949	-1.51882	-1.15867	2.13091	0.0525815
Belinostat	histone deacetylase	0.782051	0.387753	0.946306	-0.353379	2.01688	0.394298
Linsitinib	IGF-1R	0.774158	0.579398	-0.677599	-1.37972	1.33614	0.194759
Abemaciclib	Cdk4, Cdk6	0.907888	0.628721	0.452956	-0.793817	1.44402	0.279166
AT7519	Cdk1, Cdk2	0.871776	0.458176	0.973911	-0.106432	1.90271	0.413601
Axitinib	VEGFR1, VEGFR2, VEGFR3 KIT, PDGFR	1.12358	0.810084	1.55828	-0.930657	1.38699	0.313492
Osimertinib	EGFR	0.804174	0.5258	0.398	-0.573549	1.52943	0.278374
Apitolisib	mTOR, PI3Kα, PI3Kβ, PI3Kδ, PI3Kγ	0.194227	0.124811	-1.36809	-1.11547	1.55618	0.0694166
Palbociclib	CDK4, CDK6	1.13308	0.754787	1.62807	-0.38718	1.50119	0.37829
Rucaparib	PARP1, PARP2, PARP3	1.07727	0.755481	1.44386	-0.544738	1.42594	0.321792
Teniposide	topoisomerase II inhibitor	0.35363	0.242157	-0.901292	-0.894581	1.46033	0.111473
Lapatinib	EGFR, HER2	1.1733	0.839404	1.67118	-0.54966	1.39778	0.333895
Afatinib	EGFR, HER2	0.330705	0.232784	-1.29331	-1.10945	1.42065	0.097921
Afuresertib	Akt	0.246213	0.212396	-2.68595	-1.92168	1.15922	0.0338171
Trametinib	MEK1, MEK2	0.0596559	0.0424112	-1.70361	-1.19263	1.40661	0.0172447
Duvelisib	PI3Kδ, PI3Kγ	0.974375	0.753348	0.49873	-0.628706	1.29339	0.221026
NVP-BGT226	PI3Kα, PI3Kβ, PI3Kγ, mTORC1, mTORC2	0.0633636	0.039451	-0.969142	-0.723977	1.60613	0.0239126
Veliparib	PARP1, PARP2	1.03156	0.833588	0.724935	-0.552879	1.23749	0.197968
Vorinostat	histone deacetylase	1.17315	0.733745	2.46432	0.543413	1.59885	0.439403
Idelalisib	PI3K P110δ	1.13617	0.922135	1.51737	-0.214517	1.23211	0.214035
Talazoparib	PARP	0.509334	0.39446	-0.297431	-0.501348	1.29122	0.114874
Temsirolimus	mTOR inhibitor	0.195671	0.192801	-2.51903	-1.70817	1.01489	0.00287085
Ponatinib	Bcr-Abl, VEGF	1.11321	0.949599	0.714126	-0.0265003	1.1723	0.163614
Olaparib	PARP	1.07855	0.921013	1.20162	0.00666291	1.17104	0.157532
AZD6482	PI3Kβ	1.02422	0.892067	0.817012	-0.0326643	1.14814	0.132152
Cediranib	VEGFR	1.14182	0.971558	1.39256	0.285346	1.17525	0.170266
CPI-203	BRD2/3/4	0.100633	0.102081	-1.72605	-1.16046	0.985821	0.00144737
Lenvatinib	VEGFR1, VEGFR2, VEGFR3, FGFR1, FGFR2, FGFR3, FGR4, PDGFRα, c-KIT, RET	0.931288	0.879497	-0.175822	-0.448678	1.05889	0.0517916
Dactolisib	PI3K, mTOR	1.09189	0.966667	0.328004	0.0721929	1.12954	0.125225
Vemurafenib	BRAF	1.07953	1.00185	1.07637	-0.00423586	1.07754	0.0776808
Onalespib	Hsp90	0.0327055	0.0309875	-0.881341	-0.599438	1.05544	0.001718
Sunitinib	VEGFR, PDGFR, c-KIT, RET, CD114, CD135	0.959264	0.907564	0.181939	-0.0919896	1.05697	0.0517
Navitoclax	Bcl-2, Bcl-XL, Bcl-w	1.1317	0.996126	1.18356	0.448724	1.1361	0.135575
Rigosertib	Plk1, PI3K	0.0616155	0.06682	-1.2435	-0.820975	0.922111	0.00520452
Imatinib	Bcr-Abl	1.12499	1.05562	1.00568	0.290403	1.06571	0.0693678
Alisertib	Aurora A kinase	0.203823	0.252532	-1.16257	-0.671799	0.807119	0.0487087
Vismodegib	SMO receptor antagonist	1.01549	1.01227	-0.0837214	-0.0881302	1.00318	0.00322226
Megestrol	Progesterone receptor agonist	1.12573	1.0878	0.722164	0.300717	1.03487	0.0379305
Quizartinib	FLT3	1.12945	1.06437	1.54867	0.600316	1.06115	0.0650819
Toremifene	Nonsteroidal antiestrogen	0.973251	0.971526	0.0173203	-0.00526786	1.00178	0.00172533
Enzalutamide	Androgen receptor antagonist	0.94405	0.995841	-0.405257	0.103966	0.947992	0.0517913
Ribociclib	CDK4, CDK6	0.869108	0.886103	-0.0410369	0.0404265	0.98082	0.0169953
Venetoclax	Bcl2	0.794169	0.983033	-1.27825	0.18265	0.807877	0.188864
Crizotinib	ALK, ROS1, MET	0.888535	0.864506	0.705697	0.380914	1.02779	0.0240286
MMAE	microtubule polymerization inhibitor	0.00727408	0.0119582	-1.2087	-0.794582	0.608292	0.00468413
Niraparib	PARP1, PARP2	0.932231	0.960822	0.285368	0.283622	0.970243	0.0285911
Fulvestrant	selective estrogen receptor degrader	0.952404	1.04743	-0.480863	0.335443	0.90928	0.0950224
Oprozomib	Proteasome	0.00872225	0.00979268	-0.618645	-0.407409	0.89069	0.00107043
Cabozantinib	c-MET, VEGFR2	1.12564	1.08092	1.33128	0.628077	1.04137	0.0447226
Pazopanib	c-KIT, FGFR, PDGFR, VEGFR	1.02808	1.05339	0.2324	0.329144	0.975977	0.025306
GF-109203	PKCα, PKCβ1	0.861113	1.05934	-0.848739	0.503501	0.812875	0.198229
Entinostat	HDAC1, HDAC3	0.800867	0.792887	0.777147	0.497596	1.01006	0.00798012
Dovitinib	FGFR1, FGFR3, c-KIT, VEGF, PDGFR, CSFR1	1.09868	1.04866	1.38722	0.750772	1.0477	0.0500219
Sorafenib	VEGFR, PDGFR, Raf	0.961044	1.07762	-0.282573	0.497712	0.891824	0.116572
Celecoxib	cox-2, cadherin-11	1.13849	1.09543	1.4318	0.643941	1.03931	0.0430607
Capmatinib	cMET	0.845236	1.06812	-1.19041	0.509983	0.791333	0.222881
Dabrafenib	B-Raf	1.00596	1.09048	0.473038	0.517958	0.922493	0.0845203
Tamoxifen	selective estrogen receptor modulator	1.00543	1.01899	0.585031	0.507421	0.986689	0.0135637
AZD4547	FGFR 1, FGFR2, FGFR3, &lt;FGFR4, &lt;KDR, &lt;MARKs, &lt;IGF1R	0.87911	1.00794	0.200123	0.592039	0.872187	0.128827
Momelotinib	JAK1, JAK2	0.763344	1.24742	-1.06311	1.40625	0.611939	0.484074
GSK503	EZH2	0.927112	1.06727	-0.178885	0.642645	0.86868	0.140154
Defactinib	FAK	0.979786	1.01282	0.575175	0.606541	0.967386	0.0330323
Ruxolitinib	JAK1, JAK2	1.00732	1.12186	0.182665	0.736154	0.897896	0.114547
Midostaurin	FLT3, PKCα, PKCβ, PKCγ, Syk, Flk-1, Akt, PKA, c-Kit, FGFR, SRC, PDFRβ, VEGFR1, VEGFR2	0.871842	1.32069	0.238792	1.41412	0.66014	0.44885
Pinometostat	DOT-1L	0.80821	1.11343	-1.16086	0.825633	0.725873	0.305221
Erdafitinib	FGFR	0.913702	1.06482	0.440509	0.772939	0.858084	0.151114
Lucitanib	FGFR1, FGFR2, FGFR3, VEGF1, VEGF2, VEGF3, PDGFRα, PDGFRβ	1.05394	1.1379	0.985901	1.0567	0.926209	0.0839674
Regorafenib	VEGFR2, TIE2,	0.88661	1.16523	-1.31067	1.13393	0.760887	0.278622
Tazemetostat	EZH2	0.966659	1.07007	0.176609	0.931185	0.903363	0.103408
Nilotinib	Bcr-Abl	1.00253	1.22368	-0.25555	1.59844	0.819276	0.221147
BML-EI388	Chk2	0.879949	1.113	-1.65785	1.33718	0.79061	0.233051
Sepantronium	BIRC5	0.961469	1.32448	2.53712	2.53657	0.725924	0.363006
GSK2636771	PI3Kβ	0.855787	1.16611	-0.736151	1.67563	0.733883	0.310322
Lenalidomide	TNFα, IKZF1, IKZF2	1.0314	1.15701	0.44958	1.61698	0.89143	0.125617

## Sheet: FLC clone 14 combo
Raw Data - combo with 10 µM Ver155008; FLC clone 14
screenType	Well_Coordinate	Compound	Concentration	Compound_B	Concentration_B	Lum	normLum
Combo	B07	Neratinib	1e-05	HSP70	1e-05	22771	0.323944
Combo	B08	Neratinib	3.33e-06	HSP70	1e-05	57236	0.814249
Combo	B09	Neratinib	1.11e-06	HSP70	1e-05	61578	0.876019
Combo	B10	Neratinib	3.7e-07	HSP70	1e-05	59248	0.842872
Combo	B11	Neratinib	1.23e-07	HSP70	1e-05	65846	0.936736
Combo	B12	Neratinib	4.12e-08	HSP70	1e-05	75881	1.0795
Combo	B13	Ponatinib	1e-05	HSP70	1e-05	74101	1.05417
Combo	B14	Ponatinib	3.33e-06	HSP70	1e-05	66297	0.943152
Combo	B15	Ponatinib	1.11e-06	HSP70	1e-05	70135	0.997752
Combo	B16	Ponatinib	3.7e-07	HSP70	1e-05	56680	0.806339
Combo	B17	Ponatinib	1.23e-07	HSP70	1e-05	39655	0.564139
Combo	B18	Ponatinib	4.12e-08	HSP70	1e-05	32778	0.466305
Combo	B19	NVP-BGT226	1e-05	HSP70	1e-05	764	0.0108688
Combo	B20	NVP-BGT226	3.33e-06	HSP70	1e-05	32334	0.459989
Combo	B21	NVP-BGT226	1.11e-06	HSP70	1e-05	34128	0.485511
Combo	B22	NVP-BGT226	3.7e-07	HSP70	1e-05	54123	0.769963
Combo	B23	NVP-BGT226	1.23e-07	HSP70	1e-05	54719	0.778442
Combo	B24	NVP-BGT226	4.12e-08	HSP70	1e-05	67319	0.957691
Combo	C07	Fulvestrant	1e-05	HSP70	1e-05	29110	0.414124
Combo	C08	Fulvestrant	3.33e-06	HSP70	1e-05	59948	0.85283
Combo	C09	Fulvestrant	1.11e-06	HSP70	1e-05	71811	1.0216
Combo	C10	Fulvestrant	3.7e-07	HSP70	1e-05	72200	1.02713
Combo	C11	Fulvestrant	1.23e-07	HSP70	1e-05	65393	0.930292
Combo	C12	Fulvestrant	4.12e-08	HSP70	1e-05	76393	1.08678
Combo	C13	Sorafenib	1e-05	HSP70	1e-05	76366	1.0864
Combo	C14	Sorafenib	3.33e-06	HSP70	1e-05	64470	0.917161
Combo	C15	Sorafenib	1.11e-06	HSP70	1e-05	78464	1.11624
Combo	C16	Sorafenib	3.7e-07	HSP70	1e-05	79479	1.13068
Combo	C17	Sorafenib	1.23e-07	HSP70	1e-05	78859	1.12186
Combo	C18	Sorafenib	4.12e-08	HSP70	1e-05	66788	0.950137
Combo	C19	Alpelisib	1e-05	HSP70	1e-05	52707	0.749819
Combo	C20	Alpelisib	3.33e-06	HSP70	1e-05	52688	0.749548
Combo	C21	Alpelisib	1.11e-06	HSP70	1e-05	43228	0.614969
Combo	C22	Alpelisib	3.7e-07	HSP70	1e-05	59591	0.847752
Combo	C23	Alpelisib	1.23e-07	HSP70	1e-05	67049	0.95385
Combo	C24	Alpelisib	4.12e-08	HSP70	1e-05	76790	1.09243
Combo	D01	Enzalutamide	1e-05	HSP70	1e-05	41342	0.588138
Combo	D02	Enzalutamide	3.33e-06	HSP70	1e-05	36555	0.520038
Combo	D03	Enzalutamide	1.11e-06	HSP70	1e-05	56865	0.808971
Combo	D04	Enzalutamide	3.7e-07	HSP70	1e-05	62589	0.890402
Combo	D05	Enzalutamide	1.23e-07	HSP70	1e-05	69404	0.987353
Combo	D06	Enzalutamide	4.12e-08	HSP70	1e-05	56982	0.810635
Combo	D07	AZD4547	1e-05	HSP70	1e-05	60945	0.867014
Combo	D08	AZD4547	3.33e-06	HSP70	1e-05	67162	0.955458
Combo	D09	AZD4547	1.11e-06	HSP70	1e-05	61825	0.879533
Combo	D10	AZD4547	3.7e-07	HSP70	1e-05	66271	0.942782
Combo	D11	AZD4547	1.23e-07	HSP70	1e-05	67679	0.962813
Combo	D12	AZD4547	4.12e-08	HSP70	1e-05	69828	0.993385
Combo	D13	Teniposide	1e-05	HSP70	1e-05	51926	0.738708
Combo	D14	Teniposide	3.33e-06	HSP70	1e-05	45649	0.64941
Combo	D15	Teniposide	1.11e-06	HSP70	1e-05	45295	0.644374
Combo	D16	Teniposide	3.7e-07	HSP70	1e-05	49488	0.704025
Combo	D17	Teniposide	1.23e-07	HSP70	1e-05	49340	0.701919
Combo	D18	Teniposide	4.12e-08	HSP70	1e-05	56184	0.799283
Combo	D19	AZD6482	1e-05	HSP70	1e-05	56583	0.804959
Combo	D20	AZD6482	3.33e-06	HSP70	1e-05	67411	0.959
Combo	D21	AZD6482	1.11e-06	HSP70	1e-05	67882	0.965701
Combo	D22	AZD6482	3.7e-07	HSP70	1e-05	72422	1.03029
Combo	D23	AZD6482	1.23e-07	HSP70	1e-05	66128	0.940748
Combo	D24	AZD6482	4.12e-08	HSP70	1e-05	75467	1.07361
Combo	E01	Osimertinib	1e-05	HSP70	1e-05	14218	0.202268
Combo	E02	Osimertinib	3.33e-06	HSP70	1e-05	41659	0.592648
Combo	E03	Osimertinib	1.11e-06	HSP70	1e-05	58857	0.83731
Combo	E04	Osimertinib	3.7e-07	HSP70	1e-05	64241	0.913903
Combo	E05	Osimertinib	1.23e-07	HSP70	1e-05	73971	1.05232
Combo	E06	Osimertinib	4.12e-08	HSP70	1e-05	70900	1.00864
Combo	E07	Lucitanib	1e-05	HSP70	1e-05	67773	0.96415
Combo	E08	Lucitanib	3.33e-06	HSP70	1e-05	70593	1.00427
Combo	E09	Lucitanib	1.11e-06	HSP70	1e-05	70595	1.0043
Combo	E10	Lucitanib	3.7e-07	HSP70	1e-05	73217	1.0416
Combo	E11	Lucitanib	1.23e-07	HSP70	1e-05	71388	1.01558
Combo	E12	Lucitanib	4.12e-08	HSP70	1e-05	64926	0.923648
Combo	E13	Cobimetinib	1e-05	HSP70	1e-05	10414	0.148151
Combo	E14	Cobimetinib	3.33e-06	HSP70	1e-05	17583	0.250139
Combo	E15	Cobimetinib	1.11e-06	HSP70	1e-05	16266	0.231403
Combo	E16	Cobimetinib	3.7e-07	HSP70	1e-05	21522	0.306176
Combo	E17	Cobimetinib	1.23e-07	HSP70	1e-05	31339	0.445834
Combo	E18	Cobimetinib	4.12e-08	HSP70	1e-05	37321	0.530935
Combo	E19	Idelalisib	1e-05	HSP70	1e-05	57552	0.818744
Combo	E20	Idelalisib	3.33e-06	HSP70	1e-05	61769	0.878736
Combo	E21	Idelalisib	1.11e-06	HSP70	1e-05	71278	1.01401
Combo	E22	Idelalisib	3.7e-07	HSP70	1e-05	61102	0.869247
Combo	E23	Idelalisib	1.23e-07	HSP70	1e-05	72261	1.028
Combo	E24	Idelalisib	4.12e-08	HSP70	1e-05	81075	1.15339
Combo	F01	Navitoclax	1e-05	HSP70	1e-05	3205	0.0455949
Combo	F02	Navitoclax	3.33e-06	HSP70	1e-05	38133	0.542486
Combo	F03	Navitoclax	1.11e-06	HSP70	1e-05	61299	0.87205
Combo	F04	Navitoclax	3.7e-07	HSP70	1e-05	64133	0.912367
Combo	F05	Navitoclax	1.23e-07	HSP70	1e-05	64872	0.92288
Combo	F06	Navitoclax	4.12e-08	HSP70	1e-05	72611	1.03298
Combo	F07	Dovitinib	1e-05	HSP70	1e-05	74628	1.06167
Combo	F08	Dovitinib	3.33e-06	HSP70	1e-05	73192	1.04124
Combo	F09	Dovitinib	1.11e-06	HSP70	1e-05	72406	1.03006
Combo	F10	Dovitinib	3.7e-07	HSP70	1e-05	76455	1.08766
Combo	F11	Dovitinib	1.23e-07	HSP70	1e-05	59914	0.852347
Combo	F12	Dovitinib	4.12e-08	HSP70	1e-05	75330	1.07166
Combo	F13	Trametinib	1e-05	HSP70	1e-05	17380	0.247251
Combo	F14	Trametinib	3.33e-06	HSP70	1e-05	26950	0.383395
Combo	F15	Trametinib	1.11e-06	HSP70	1e-05	26114	0.371502
Combo	F16	Trametinib	3.7e-07	HSP70	1e-05	26252	0.373465
Combo	F17	Trametinib	1.23e-07	HSP70	1e-05	26499	0.376979
Combo	F18	Trametinib	4.12e-08	HSP70	1e-05	22484	0.319861
Combo	F19	Taselisib	1e-05	HSP70	1e-05	27948	0.397593
Combo	F20	Taselisib	3.33e-06	HSP70	1e-05	33152	0.471626
Combo	F21	Taselisib	1.11e-06	HSP70	1e-05	38030	0.541021
Combo	F22	Taselisib	3.7e-07	HSP70	1e-05	36069	0.513124
Combo	F23	Taselisib	1.23e-07	HSP70	1e-05	43783	0.622864
Combo	F24	Taselisib	4.12e-08	HSP70	1e-05	54016	0.768441
Combo	G01	Axitinib	1e-05	HSP70	1e-05	53456	0.760474
Combo	G02	Axitinib	3.33e-06	HSP70	1e-05	44242	0.629394
Combo	G03	Axitinib	1.11e-06	HSP70	1e-05	63488	0.903191
Combo	G04	Axitinib	3.7e-07	HSP70	1e-05	65710	0.934801
Combo	G05	Axitinib	1.23e-07	HSP70	1e-05	65025	0.925057
Combo	G06	Axitinib	4.12e-08	HSP70	1e-05	61727	0.878139
Combo	G07	Quizartinib	1e-05	HSP70	1e-05	62113	0.88363
Combo	G08	Quizartinib	3.33e-06	HSP70	1e-05	61265	0.871566
Combo	G09	Quizartinib	1.11e-06	HSP70	1e-05	68998	0.981577
Combo	G10	Quizartinib	3.7e-07	HSP70	1e-05	64321	0.915041
Combo	G11	Quizartinib	1.23e-07	HSP70	1e-05	62291	0.886162
Combo	G12	Quizartinib	4.12e-08	HSP70	1e-05	65966	0.938443
Combo	G13	Cabozantinib	1e-05	HSP70	1e-05	63436	0.902451
Combo	G14	Cabozantinib	3.33e-06	HSP70	1e-05	61799	0.879163
Combo	G15	Cabozantinib	1.11e-06	HSP70	1e-05	62552	0.889875
Combo	G16	Cabozantinib	3.7e-07	HSP70	1e-05	65617	0.933478
Combo	G17	Cabozantinib	1.23e-07	HSP70	1e-05	68142	0.9694
Combo	G18	Cabozantinib	4.12e-08	HSP70	1e-05	62624	0.8909
Combo	G19	Rigosertib	1e-05	HSP70	1e-05	31718	0.451226
Combo	G20	Rigosertib	3.33e-06	HSP70	1e-05	34397	0.489337
Combo	G21	Rigosertib	1.11e-06	HSP70	1e-05	34163	0.486009
Combo	G22	Rigosertib	3.7e-07	HSP70	1e-05	37981	0.540324
Combo	G23	Rigosertib	1.23e-07	HSP70	1e-05	42580	0.60575
Combo	G24	Rigosertib	4.12e-08	HSP70	1e-05	39808	0.566315
Combo	H01	Dasatinib	1e-05	HSP70	1e-05	28043	0.398944
Combo	H02	Dasatinib	3.33e-06	HSP70	1e-05	33470	0.47615
Combo	H03	Dasatinib	1.11e-06	HSP70	1e-05	30336	0.431565
Combo	H04	Dasatinib	3.7e-07	HSP70	1e-05	38677	0.550225
Combo	H05	Dasatinib	1.23e-07	HSP70	1e-05	47369	0.673879
Combo	H06	Dasatinib	4.12e-08	HSP70	1e-05	54400	0.773904
Combo	H07	Vorinostat	1e-05	HSP70	1e-05	29115	0.414195
Combo	H08	Vorinostat	3.33e-06	HSP70	1e-05	42674	0.607087
Combo	H09	Vorinostat	1.11e-06	HSP70	1e-05	59737	0.849829
Combo	H10	Vorinostat	3.7e-07	HSP70	1e-05	56632	0.805656
Combo	H11	Vorinostat	1.23e-07	HSP70	1e-05	62619	0.890828
Combo	H12	Vorinostat	4.12e-08	HSP70	1e-05	65680	0.934375
Combo	H13	Everolimus	1e-05	HSP70	1e-05	61387	0.873302
Combo	H14	Everolimus	3.33e-06	HSP70	1e-05	54657	0.77756
Combo	H15	Everolimus	1.11e-06	HSP70	1e-05	64174	0.91295
Combo	H16	Everolimus	3.7e-07	HSP70	1e-05	62937	0.895352
Combo	H17	Everolimus	1.23e-07	HSP70	1e-05	58071	0.826128
Combo	H18	Everolimus	4.12e-08	HSP70	1e-05	62312	0.886461
Combo	H19	Megestrol	1e-05	HSP70	1e-05	63632	0.905239
Combo	H20	Megestrol	3.33e-06	HSP70	1e-05	59318	0.843868
Combo	H21	Megestrol	1.11e-06	HSP70	1e-05	61228	0.87104
Combo	H22	Megestrol	3.7e-07	HSP70	1e-05	66251	0.942498
Combo	H23	Megestrol	1.23e-07	HSP70	1e-05	63515	0.903575
Combo	H24	Megestrol	4.12e-08	HSP70	1e-05	69728	0.991962
Combo	I01	Dabrafenib	1e-05	HSP70	1e-05	53333	0.758724
Combo	I02	Dabrafenib	3.33e-06	HSP70	1e-05	74494	1.05976
Combo	I03	Dabrafenib	1.11e-06	HSP70	1e-05	70211	0.998833
Combo	I04	Dabrafenib	3.7e-07	HSP70	1e-05	70745	1.00643
Combo	I05	Dabrafenib	1.23e-07	HSP70	1e-05	71281	1.01406
Combo	I06	Dabrafenib	4.12e-08	HSP70	1e-05	73525	1.04598
Combo	I07	Belinostat	1e-05	HSP70	1e-05	892	0.0126897
Combo	I08	Belinostat	3.33e-06	HSP70	1e-05	31615	0.44976
Combo	I09	Belinostat	1.11e-06	HSP70	1e-05	39740	0.565348
Combo	I10	Belinostat	3.7e-07	HSP70	1e-05	30811	0.438322
Combo	I11	Belinostat	1.23e-07	HSP70	1e-05	54883	0.780775
Combo	I12	Belinostat	4.12e-08	HSP70	1e-05	52980	0.753702
Combo	I13	Tamoxifen	1e-05	HSP70	1e-05	68705	0.977409
Combo	I14	Tamoxifen	3.33e-06	HSP70	1e-05	69488	0.988548
Combo	I15	Tamoxifen	1.11e-06	HSP70	1e-05	70300	1.0001
Combo	I16	Tamoxifen	3.7e-07	HSP70	1e-05	72348	1.02923
Combo	I17	Tamoxifen	1.23e-07	HSP70	1e-05	69780	0.992702
Combo	I18	Tamoxifen	4.12e-08	HSP70	1e-05	65939	0.938059
Combo	I19	Sunitinib	1e-05	HSP70	1e-05	60980	0.867512
Combo	I20	Sunitinib	3.33e-06	HSP70	1e-05	61970	0.881596
Combo	I21	Sunitinib	1.11e-06	HSP70	1e-05	68768	0.978305
Combo	I22	Sunitinib	3.7e-07	HSP70	1e-05	71574	1.01822
Combo	I23	Sunitinib	1.23e-07	HSP70	1e-05	72478	1.03108
Combo	I24	Sunitinib	4.12e-08	HSP70	1e-05	73456	1.045
Combo	J01	Vemurafenib	1e-05	HSP70	1e-05	83232	1.18407
Combo	J02	Vemurafenib	3.33e-06	HSP70	1e-05	82677	1.17618
Combo	J03	Vemurafenib	1.11e-06	HSP70	1e-05	70521	1.00324
Combo	J04	Vemurafenib	3.7e-07	HSP70	1e-05	73832	1.05035
Combo	J05	Vemurafenib	1.23e-07	HSP70	1e-05	71368	1.01529
Combo	J06	Vemurafenib	4.12e-08	HSP70	1e-05	70676	1.00545
Combo	J19	Vismodegib	1e-05	HSP70	1e-05	76003	1.08123
Combo	J20	Vismodegib	3.33e-06	HSP70	1e-05	63307	0.900616
Combo	J21	Vismodegib	1.11e-06	HSP70	1e-05	67143	0.955188
Combo	J22	Vismodegib	3.7e-07	HSP70	1e-05	60312	0.858009
Combo	J23	Vismodegib	1.23e-07	HSP70	1e-05	67364	0.958332
Combo	J24	Vismodegib	4.12e-08	HSP70	1e-05	73558	1.04645
Combo	K01	Ibrutinib	1e-05	HSP70	1e-05	61317	0.872306
Combo	K02	Ibrutinib	3.33e-06	HSP70	1e-05	66164	0.94126
Combo	K03	Ibrutinib	1.11e-06	HSP70	1e-05	61701	0.877769
Combo	K04	Ibrutinib	3.7e-07	HSP70	1e-05	56977	0.810564
Combo	K05	Ibrutinib	1.23e-07	HSP70	1e-05	64158	0.912722
Combo	K06	Ibrutinib	4.12e-08	HSP70	1e-05	62765	0.892905
Combo	K07	BMS-754807	1e-05	HSP70	1e-05	35927	0.511104
Combo	K08	BMS-754807	3.33e-06	HSP70	1e-05	34587	0.49204
Combo	K09	BMS-754807	1.11e-06	HSP70	1e-05	36750	0.522812
Combo	K10	BMS-754807	3.7e-07	HSP70	1e-05	43612	0.620432
Combo	K11	BMS-754807	1.23e-07	HSP70	1e-05	41659	0.592648
Combo	K12	BMS-754807	4.12e-08	HSP70	1e-05	47458	0.675145
Combo	K13	MK2206	1e-05	HSP70	1e-05	69726	0.991934
Combo	K14	MK2206	3.33e-06	HSP70	1e-05	63929	0.909465
Combo	K15	MK2206	1.11e-06	HSP70	1e-05	62615	0.890771
Combo	K16	MK2206	3.7e-07	HSP70	1e-05	64243	0.913932
Combo	K17	MK2206	1.23e-07	HSP70	1e-05	62947	0.895495
Combo	K18	MK2206	4.12e-08	HSP70	1e-05	60894	0.866288
Combo	K19	Imatinib	1e-05	HSP70	1e-05	44657	0.635298
Combo	K20	Imatinib	3.33e-06	HSP70	1e-05	61866	0.880116
Combo	K21	Imatinib	1.11e-06	HSP70	1e-05	64174	0.91295
Combo	K22	Imatinib	3.7e-07	HSP70	1e-05	64458	0.91699
Combo	K23	Imatinib	1.23e-07	HSP70	1e-05	60479	0.860384
Combo	K24	Imatinib	4.12e-08	HSP70	1e-05	74865	1.06504
Combo	L01	Celecoxib	1e-05	HSP70	1e-05	64543	0.9182
Combo	L02	Celecoxib	3.33e-06	HSP70	1e-05	55149	0.784559
Combo	L03	Celecoxib	1.11e-06	HSP70	1e-05	69100	0.983028
Combo	L04	Celecoxib	3.7e-07	HSP70	1e-05	65812	0.936253
Combo	L05	Celecoxib	1.23e-07	HSP70	1e-05	59287	0.843427
Combo	L06	Celecoxib	4.12e-08	HSP70	1e-05	63871	0.90864
Combo	L07	Lapatinib	1e-05	HSP70	1e-05	58849	0.837196
Combo	L08	Lapatinib	3.33e-06	HSP70	1e-05	57863	0.823169
Combo	L09	Lapatinib	1.11e-06	HSP70	1e-05	57667	0.82038
Combo	L10	Lapatinib	3.7e-07	HSP70	1e-05	64425	0.916521
Combo	L11	Lapatinib	1.23e-07	HSP70	1e-05	64543	0.9182
Combo	L12	Lapatinib	4.12e-08	HSP70	1e-05	59790	0.850583
Combo	L13	Buparlisib	1e-05	HSP70	1e-05	27188	0.386781
Combo	L14	Buparlisib	3.33e-06	HSP70	1e-05	43091	0.61302
Combo	L15	Buparlisib	1.11e-06	HSP70	1e-05	49278	0.701037
Combo	L16	Buparlisib	3.7e-07	HSP70	1e-05	47126	0.670422
Combo	L17	Buparlisib	1.23e-07	HSP70	1e-05	61048	0.868479
Combo	L18	Buparlisib	4.12e-08	HSP70	1e-05	58463	0.831704
Combo	L19	Cediranib	1e-05	HSP70	1e-05	63623	0.905111
Combo	L20	Cediranib	3.33e-06	HSP70	1e-05	59911	0.852304
Combo	L21	Cediranib	1.11e-06	HSP70	1e-05	57971	0.824705
Combo	L22	Cediranib	3.7e-07	HSP70	1e-05	62637	0.891084
Combo	L23	Cediranib	1.23e-07	HSP70	1e-05	67197	0.955956
Combo	L24	Cediranib	4.12e-08	HSP70	1e-05	69393	0.987196
Combo	M01	Dactolisib	1e-05	HSP70	1e-05	29565	0.420597
Combo	M02	Dactolisib	3.33e-06	HSP70	1e-05	33373	0.47477
Combo	M03	Dactolisib	1.11e-06	HSP70	1e-05	32223	0.45841
Combo	M04	Dactolisib	3.7e-07	HSP70	1e-05	70210	0.998819
Combo	M05	Dactolisib	1.23e-07	HSP70	1e-05	67489	0.96011
Combo	M06	Dactolisib	4.12e-08	HSP70	1e-05	68580	0.975631
Combo	M07	Ruxolitinib	1e-05	HSP70	1e-05	70046	0.996486
Combo	M08	Ruxolitinib	3.33e-06	HSP70	1e-05	69565	0.989643
Combo	M09	Ruxolitinib	1.11e-06	HSP70	1e-05	70685	1.00558
Combo	M10	Ruxolitinib	3.7e-07	HSP70	1e-05	62903	0.894869
Combo	M11	Ruxolitinib	1.23e-07	HSP70	1e-05	72646	1.03347
Combo	M12	Ruxolitinib	4.12e-08	HSP70	1e-05	66534	0.946524
Combo	M13	Olaparib	1e-05	HSP70	1e-05	44569	0.634046
Combo	M14	Olaparib	3.33e-06	HSP70	1e-05	56641	0.805784
Combo	M15	Olaparib	1.11e-06	HSP70	1e-05	62238	0.885408
Combo	M16	Olaparib	3.7e-07	HSP70	1e-05	66992	0.953039
Combo	M17	Olaparib	1.23e-07	HSP70	1e-05	57200	0.813737
Combo	M18	Olaparib	4.12e-08	HSP70	1e-05	71816	1.02167
Combo	M19	Vandetanib	1e-05	HSP70	1e-05	23008	0.327316
Combo	M20	Vandetanib	3.33e-06	HSP70	1e-05	42458	0.604015
Combo	M21	Vandetanib	1.11e-06	HSP70	1e-05	50165	0.713656
Combo	M22	Vandetanib	3.7e-07	HSP70	1e-05	55889	0.795086
Combo	M23	Vandetanib	1.23e-07	HSP70	1e-05	64252	0.91406
Combo	M24	Vandetanib	4.12e-08	HSP70	1e-05	71877	1.02253
Combo	N01	Erlotinib	1e-05	HSP70	1e-05	48463	0.689443
Combo	N02	Erlotinib	3.33e-06	HSP70	1e-05	55295	0.786636
Combo	N03	Erlotinib	1.11e-06	HSP70	1e-05	48027	0.68324
Combo	N04	Erlotinib	3.7e-07	HSP70	1e-05	53723	0.764272
Combo	N05	Erlotinib	1.23e-07	HSP70	1e-05	67360	0.958275
Combo	N06	Erlotinib	4.12e-08	HSP70	1e-05	73661	1.04791
Combo	N07	Palbociclib	1e-05	HSP70	1e-05	53496	0.761043
Combo	N08	Palbociclib	3.33e-06	HSP70	1e-05	50683	0.721025
Combo	N09	Palbociclib	1.11e-06	HSP70	1e-05	55856	0.794617
Combo	N10	Palbociclib	3.7e-07	HSP70	1e-05	56271	0.800521
Combo	N11	Palbociclib	1.23e-07	HSP70	1e-05	58302	0.829414
Combo	N12	Palbociclib	4.12e-08	HSP70	1e-05	63136	0.898183
Combo	N13	Rucaparib	1e-05	HSP70	1e-05	67276	0.95708
Combo	N14	Rucaparib	3.33e-06	HSP70	1e-05	61652	0.877072
Combo	N15	Rucaparib	1.11e-06	HSP70	1e-05	64521	0.917887
Combo	N16	Rucaparib	3.7e-07	HSP70	1e-05	70970	1.00963
Combo	N17	Rucaparib	1.23e-07	HSP70	1e-05	69639	0.990696
Combo	N18	Rucaparib	4.12e-08	HSP70	1e-05	65977	0.9386
Combo	N19	AZD1775	1e-05	HSP70	1e-05	31190	0.443714
Combo	N20	AZD1775	3.33e-06	HSP70	1e-05	32143	0.457272
Combo	N21	AZD1775	1.11e-06	HSP70	1e-05	40239	0.572447
Combo	N22	AZD1775	3.7e-07	HSP70	1e-05	51561	0.733515
Combo	N23	AZD1775	1.23e-07	HSP70	1e-05	65972	0.938529
Combo	N24	AZD1775	4.12e-08	HSP70	1e-05	73466	1.04514
Combo	O07	Pazopanib	1e-05	HSP70	1e-05	68879	0.979884
Combo	O08	Pazopanib	3.33e-06	HSP70	1e-05	72413	1.03016
Combo	O09	Pazopanib	1.11e-06	HSP70	1e-05	70875	1.00828
Combo	O10	Pazopanib	3.7e-07	HSP70	1e-05	68001	0.967394
Combo	O11	Pazopanib	1.23e-07	HSP70	1e-05	67523	0.960594
Combo	O12	Pazopanib	4.12e-08	HSP70	1e-05	73995	1.05267
Combo	O13	Veliparib	1e-05	HSP70	1e-05	67399	0.958829
Combo	O14	Veliparib	3.33e-06	HSP70	1e-05	72725	1.0346
Combo	O15	Veliparib	1.11e-06	HSP70	1e-05	72262	1.02801
Combo	O16	Veliparib	3.7e-07	HSP70	1e-05	74576	1.06093
Combo	O17	Veliparib	1.23e-07	HSP70	1e-05	71003	1.0101
Combo	O18	Veliparib	4.12e-08	HSP70	1e-05	51888	0.738167
Combo	O19	Poziotinib	1e-05	HSP70	1e-05	35020	0.4982
Combo	O20	Poziotinib	3.33e-06	HSP70	1e-05	39340	0.559657
Combo	O21	Poziotinib	1.11e-06	HSP70	1e-05	45262	0.643905
Combo	O22	Poziotinib	3.7e-07	HSP70	1e-05	48533	0.690439
Combo	O23	Poziotinib	1.23e-07	HSP70	1e-05	54395	0.773832
Combo	O24	Poziotinib	4.12e-08	HSP70	1e-05	56868	0.809014
Combo	C01	Busulfan	5e-06	HSP70	1e-05	77556	1.2443
Combo	C02	Busulfan	1.25e-06	HSP70	1e-05	70916	1.13777
Combo	C03	Busulfan	3.13e-07	HSP70	1e-05	69652	1.11749
Combo	C04	Busulfan	7.81e-08	HSP70	1e-05	69362	1.11284
Combo	C05	Busulfan	1.95e-08	HSP70	1e-05	61211	0.982063
Combo	C06	Busulfan	4.88e-09	HSP70	1e-05	47746	0.766032
Combo	C07	Doxorubicin	5e-06	HSP70	1e-05	863	0.0138459
Combo	C08	Doxorubicin	1.25e-06	HSP70	1e-05	29448	0.472461
Combo	C09	Doxorubicin	3.13e-07	HSP70	1e-05	50710	0.813586
Combo	C10	Doxorubicin	7.81e-08	HSP70	1e-05	51764	0.830496
Combo	C11	Doxorubicin	1.95e-08	HSP70	1e-05	65851	1.05651
Combo	C12	Doxorubicin	4.88e-09	HSP70	1e-05	76751	1.23139
Combo	C13	Allopurinol	5e-06	HSP70	1e-05	72055	1.15604
Combo	C14	Allopurinol	1.25e-06	HSP70	1e-05	72613	1.165
Combo	C15	Allopurinol	3.13e-07	HSP70	1e-05	67102	1.07658
Combo	C16	Allopurinol	7.81e-08	HSP70	1e-05	68662	1.10161
Combo	C17	Allopurinol	1.95e-08	HSP70	1e-05	71979	1.15482
Combo	C18	Allopurinol	4.88e-09	HSP70	1e-05	64120	1.02873
Combo	D01	Cyclophosphamide	5e-06	HSP70	1e-05	77864	1.24924
Combo	D02	Cyclophosphamide	1.25e-06	HSP70	1e-05	68286	1.09557
Combo	D03	Cyclophosphamide	3.13e-07	HSP70	1e-05	61622	0.988657
Combo	D04	Cyclophosphamide	7.81e-08	HSP70	1e-05	67487	1.08275
Combo	D05	Cyclophosphamide	1.95e-08	HSP70	1e-05	62542	1.00342
Combo	D06	Cyclophosphamide	4.88e-09	HSP70	1e-05	49966	0.801649
Combo	D07	Epirubicin	5e-06	HSP70	1e-05	8724	0.139967
Combo	D08	Epirubicin	1.25e-06	HSP70	1e-05	1182	0.0189639
Combo	D09	Epirubicin	3.13e-07	HSP70	1e-05	48688	0.781145
Combo	D10	Epirubicin	7.81e-08	HSP70	1e-05	56465	0.905919
Combo	D11	Epirubicin	1.95e-08	HSP70	1e-05	65753	1.05493
Combo	D12	Epirubicin	4.88e-09	HSP70	1e-05	72315	1.16021
Combo	D13	Pentostatin	5e-06	HSP70	1e-05	50655	0.812704
Combo	D14	Pentostatin	1.25e-06	HSP70	1e-05	53000	0.850326
Combo	D15	Pentostatin	3.13e-07	HSP70	1e-05	48192	0.773187
Combo	D16	Pentostatin	7.81e-08	HSP70	1e-05	59796	0.959361
Combo	D17	Pentostatin	1.95e-08	HSP70	1e-05	50692	0.813297
Combo	D18	Pentostatin	4.88e-09	HSP70	1e-05	58007	0.930658
Combo	D19	Mitomycin	5e-06	HSP70	1e-05	10439	0.167482
Combo	D20	Mitomycin	1.25e-06	HSP70	1e-05	44467	0.713424
Combo	D21	Mitomycin	3.13e-07	HSP70	1e-05	56353	0.904122
Combo	D22	Mitomycin	7.81e-08	HSP70	1e-05	58348	0.936129
Combo	D23	Mitomycin	1.95e-08	HSP70	1e-05	61132	0.980795
Combo	D24	Mitomycin	4.88e-09	HSP70	1e-05	67738	1.08678
Combo	E01	Temozolomide	5e-06	HSP70	1e-05	59527	0.955045
Combo	E02	Temozolomide	1.25e-06	HSP70	1e-05	55582	0.891752
Combo	E03	Temozolomide	3.13e-07	HSP70	1e-05	62144	0.997032
Combo	E04	Temozolomide	7.81e-08	HSP70	1e-05	69245	1.11096
Combo	E05	Temozolomide	1.95e-08	HSP70	1e-05	67918	1.08967
Combo	E06	Temozolomide	4.88e-09	HSP70	1e-05	63377	1.01681
Combo	E07	Ethinyl estradiol	5e-06	HSP70	1e-05	70210	1.12644
Combo	E08	Ethinyl estradiol	1.25e-06	HSP70	1e-05	69835	1.12043
Combo	E09	Ethinyl estradiol	3.13e-07	HSP70	1e-05	65503	1.05092
Combo	E10	Ethinyl estradiol	7.81e-08	HSP70	1e-05	65080	1.04414
Combo	E11	Ethinyl estradiol	1.95e-08	HSP70	1e-05	67408	1.08149
Combo	E12	Ethinyl estradiol	4.88e-09	HSP70	1e-05	70336	1.12846
Combo	E13	Cytarabine	5e-06	HSP70	1e-05	49443	0.793258
Combo	E14	Cytarabine	1.25e-06	HSP70	1e-05	56087	0.899854
Combo	E15	Cytarabine	3.13e-07	HSP70	1e-05	76307	1.22426
Combo	E16	Cytarabine	7.81e-08	HSP70	1e-05	74738	1.19909
Combo	E17	Cytarabine	1.95e-08	HSP70	1e-05	67662	1.08556
Combo	E18	Cytarabine	4.88e-09	HSP70	1e-05	69361	1.11282
Combo	E19	Cisplatin	1.5e-06	HSP70	1e-05	61561	0.980169
Combo	E20	Cisplatin	3.75e-07	HSP70	1e-05	71417	1.1371
Combo	E21	Cisplatin	9.38e-08	HSP70	1e-05	78131	1.244
Combo	E22	Cisplatin	2.34e-08	HSP70	1e-05	68877	1.09665
Combo	E23	Cisplatin	5.86e-09	HSP70	1e-05	71391	1.13668
Combo	E24	Cisplatin	1.46e-09	HSP70	1e-05	77355	1.23164
Combo	F01	Pemetrexed	5e-06	HSP70	1e-05	53695	0.854927
Combo	F02	Pemetrexed	1.25e-06	HSP70	1e-05	50076	0.797306
Combo	F03	Pemetrexed	3.13e-07	HSP70	1e-05	63081	1.00437
Combo	F04	Pemetrexed	7.81e-08	HSP70	1e-05	62763	0.999307
Combo	F05	Pemetrexed	1.95e-08	HSP70	1e-05	67899	1.08108
Combo	F06	Pemetrexed	4.88e-09	HSP70	1e-05	73994	1.17813
Combo	F07	Cabazitaxel	5e-06	HSP70	1e-05	50016	0.802452
Combo	F08	Cabazitaxel	1.25e-06	HSP70	1e-05	47996	0.770043
Combo	F09	Cabazitaxel	3.13e-07	HSP70	1e-05	49049	0.786937
Combo	F10	Cabazitaxel	7.81e-08	HSP70	1e-05	48267	0.774391
Combo	F11	Cabazitaxel	1.95e-08	HSP70	1e-05	45410	0.728553
Combo	F12	Cabazitaxel	4.88e-09	HSP70	1e-05	67250	1.07895
Combo	F13	Topotecan	5e-06	HSP70	1e-05	32522	0.52178
Combo	F14	Topotecan	1.25e-06	HSP70	1e-05	44613	0.715766
Combo	F15	Topotecan	3.13e-07	HSP70	1e-05	50687	0.813217
Combo	F16	Topotecan	7.81e-08	HSP70	1e-05	62396	1.00107
Combo	F17	Topotecan	1.95e-08	HSP70	1e-05	59607	0.956329
Combo	F18	Topotecan	4.88e-09	HSP70	1e-05	64586	1.03621
Combo	F19	Altretamine	5e-06	HSP70	1e-05	68477	1.09864
Combo	F20	Altretamine	1.25e-06	HSP70	1e-05	70274	1.12747
Combo	F21	Altretamine	3.13e-07	HSP70	1e-05	74119	1.18916
Combo	F22	Altretamine	7.81e-08	HSP70	1e-05	67272	1.0793
Combo	F23	Altretamine	1.95e-08	HSP70	1e-05	68381	1.0971
Combo	F24	Altretamine	4.88e-09	HSP70	1e-05	75372	1.20926
Combo	G01	Pralatrexate	5e-06	HSP70	1e-05	43606	0.69961
Combo	G02	Pralatrexate	1.25e-06	HSP70	1e-05	48131	0.772209
Combo	G03	Pralatrexate	3.13e-07	HSP70	1e-05	45893	0.736303
Combo	G04	Pralatrexate	7.81e-08	HSP70	1e-05	45035	0.722537
Combo	G05	Pralatrexate	1.95e-08	HSP70	1e-05	50283	0.806735
Combo	G06	Pralatrexate	4.88e-09	HSP70	1e-05	60759	0.974811
Combo	G07	Docetaxel	5e-06	HSP70	1e-05	45778	0.734457
Combo	G08	Docetaxel	1.25e-06	HSP70	1e-05	42313	0.678865
Combo	G09	Docetaxel	3.13e-07	HSP70	1e-05	43596	0.69945
Combo	G10	Docetaxel	7.81e-08	HSP70	1e-05	39637	0.635932
Combo	G11	Docetaxel	1.95e-08	HSP70	1e-05	38868	0.623594
Combo	G12	Docetaxel	4.88e-09	HSP70	1e-05	47472	0.761636
Combo	G13	Idarubicin	5e-06	HSP70	1e-05	1043	0.0167338
Combo	G14	Idarubicin	1.25e-06	HSP70	1e-05	4196	0.0673202
Combo	G15	Idarubicin	3.13e-07	HSP70	1e-05	35330	0.566831
Combo	G16	Idarubicin	7.81e-08	HSP70	1e-05	48901	0.784563
Combo	G17	Idarubicin	1.95e-08	HSP70	1e-05	54359	0.87213
Combo	G18	Idarubicin	4.88e-09	HSP70	1e-05	59960	0.961992
Combo	G19	Bleomycin	5e-06	HSP70	1e-05	48692	0.781209
Combo	G20	Bleomycin	1.25e-06	HSP70	1e-05	59707	0.957933
Combo	G21	Bleomycin	3.13e-07	HSP70	1e-05	62301	0.999551
Combo	G22	Bleomycin	7.81e-08	HSP70	1e-05	59202	0.949831
Combo	G23	Bleomycin	1.95e-08	HSP70	1e-05	70489	1.13092
Combo	G24	Bleomycin	4.88e-09	HSP70	1e-05	66716	1.07038
Combo	H01	Methotrexate	5e-06	HSP70	1e-05	41942	0.672913
Combo	H02	Methotrexate	1.25e-06	HSP70	1e-05	44896	0.720307
Combo	H03	Methotrexate	3.13e-07	HSP70	1e-05	49884	0.800334
Combo	H04	Methotrexate	7.81e-08	HSP70	1e-05	63172	1.01353
Combo	H05	Methotrexate	1.95e-08	HSP70	1e-05	62970	1.01028
Combo	H06	Methotrexate	4.88e-09	HSP70	1e-05	65156	1.04536
Combo	H07	Ixabepilone	5e-06	HSP70	1e-05	40813	0.6548
Combo	H08	Ixabepilone	1.25e-06	HSP70	1e-05	42386	0.680037
Combo	H09	Ixabepilone	3.13e-07	HSP70	1e-05	41174	0.660591
Combo	H10	Ixabepilone	7.81e-08	HSP70	1e-05	39364	0.631552
Combo	H11	Ixabepilone	1.95e-08	HSP70	1e-05	41941	0.672897
Combo	H12	Ixabepilone	4.88e-09	HSP70	1e-05	60923	0.977442
Combo	H13	Daunorubicin	5e-06	HSP70	1e-05	790	0.0126747
Combo	H14	Daunorubicin	1.25e-06	HSP70	1e-05	8040	0.128993
Combo	H15	Daunorubicin	3.13e-07	HSP70	1e-05	37637	0.603844
Combo	H16	Daunorubicin	7.81e-08	HSP70	1e-05	53919	0.865071
Combo	H17	Daunorubicin	1.95e-08	HSP70	1e-05	58093	0.932038
Combo	H18	Daunorubicin	4.88e-09	HSP70	1e-05	69088	1.10844
Combo	H19	SN-38	5e-06	HSP70	1e-05	17979	0.288453
Combo	H20	SN-38	1.25e-06	HSP70	1e-05	44319	0.711049
Combo	H21	SN-38	3.13e-07	HSP70	1e-05	42265	0.678095
Combo	H22	SN-38	7.81e-08	HSP70	1e-05	43514	0.698134
Combo	H23	SN-38	1.95e-08	HSP70	1e-05	51604	0.827929
Combo	H24	SN-38	4.88e-09	HSP70	1e-05	72741	1.16705
Combo	I01	Fluorouracil	5e-06	HSP70	1e-05	52656	0.844807
Combo	I02	Fluorouracil	1.25e-06	HSP70	1e-05	67252	1.07898
Combo	I03	Fluorouracil	3.13e-07	HSP70	1e-05	71597	1.14869
Combo	I04	Fluorouracil	7.81e-08	HSP70	1e-05	66481	1.06661
Combo	I05	Fluorouracil	1.95e-08	HSP70	1e-05	67792	1.08765
Combo	I06	Fluorouracil	4.88e-09	HSP70	1e-05	46512	0.746234
Combo	I07	Vinorelbine	5e-06	HSP70	1e-05	30653	0.491794
Combo	I08	Vinorelbine	1.25e-06	HSP70	1e-05	40487	0.649569
Combo	I09	Vinorelbine	3.13e-07	HSP70	1e-05	39709	0.637087
Combo	I10	Vinorelbine	7.81e-08	HSP70	1e-05	45777	0.734441
Combo	I11	Vinorelbine	1.95e-08	HSP70	1e-05	42527	0.682299
Combo	I12	Vinorelbine	4.88e-09	HSP70	1e-05	70090	1.12452
Combo	I13	Etoposide	5e-06	HSP70	1e-05	47863	0.767909
Combo	I14	Etoposide	1.25e-06	HSP70	1e-05	54278	0.870831
Combo	I15	Etoposide	3.13e-07	HSP70	1e-05	56615	0.908325
Combo	I16	Etoposide	7.81e-08	HSP70	1e-05	63508	1.01892
Combo	I17	Etoposide	1.95e-08	HSP70	1e-05	63126	1.01279
Combo	I18	Etoposide	4.88e-09	HSP70	1e-05	64185	1.02978
Combo	J01	Gemcitabine	5e-06	HSP70	1e-05	42409	0.680406
Combo	J02	Gemcitabine	1.25e-06	HSP70	1e-05	36220	0.58111
Combo	J03	Gemcitabine	3.13e-07	HSP70	1e-05	42149	0.676234
Combo	J04	Gemcitabine	7.81e-08	HSP70	1e-05	43660	0.700477
Combo	J05	Gemcitabine	1.95e-08	HSP70	1e-05	44742	0.717836
Combo	J06	Gemcitabine	4.88e-09	HSP70	1e-05	41663	0.668437
Combo	J07	Vinblastine	5e-06	HSP70	1e-05	38967	0.625182
Combo	J08	Vinblastine	1.25e-06	HSP70	1e-05	36990	0.593464
Combo	J09	Vinblastine	3.13e-07	HSP70	1e-05	39673	0.636509
Combo	J10	Vinblastine	7.81e-08	HSP70	1e-05	39613	0.635547
Combo	J11	Vinblastine	1.95e-08	HSP70	1e-05	41089	0.659228
Combo	J12	Vinblastine	4.88e-09	HSP70	1e-05	48291	0.774776
Combo	J13	Paclitaxel	5e-06	HSP70	1e-05	38899	0.624092
Combo	J14	Paclitaxel	1.25e-06	HSP70	1e-05	43352	0.695535
Combo	J15	Paclitaxel	3.13e-07	HSP70	1e-05	46289	0.742656
Combo	J16	Paclitaxel	7.81e-08	HSP70	1e-05	48976	0.785766
Combo	J17	Paclitaxel	1.95e-08	HSP70	1e-05	59787	0.959216
Combo	J18	Paclitaxel	4.88e-09	HSP70	1e-05	63916	1.02546
Combo	K01	Vincristine	5e-06	HSP70	1e-05	35241	0.565403
Combo	K02	Vincristine	1.25e-06	HSP70	1e-05	30355	0.487012
Combo	K03	Vincristine	3.13e-07	HSP70	1e-05	33576	0.53869
Combo	K04	Vincristine	7.81e-08	HSP70	1e-05	33909	0.544032
Combo	K05	Vincristine	1.95e-08	HSP70	1e-05	34170	0.54822
Combo	K06	Vincristine	4.88e-09	HSP70	1e-05	36377	0.583629
Combo	K07	Carfilzomib	5e-06	HSP70	1e-05	813	0.0130437
Combo	K08	Carfilzomib	1.25e-06	HSP70	1e-05	749	0.0120169
Combo	K09	Carfilzomib	3.13e-07	HSP70	1e-05	796	0.0127709
Combo	K10	Carfilzomib	7.81e-08	HSP70	1e-05	8542	0.137047
Combo	K11	Carfilzomib	1.95e-08	HSP70	1e-05	55098	0.883987
Combo	K12	Carfilzomib	4.88e-09	HSP70	1e-05	59080	0.947873
Combo	K13	Hydroxyurea	5e-06	HSP70	1e-05	62419	1.00144
Combo	K14	Hydroxyurea	1.25e-06	HSP70	1e-05	64684	1.03778
Combo	K15	Hydroxyurea	3.13e-07	HSP70	1e-05	63822	1.02395
Combo	K16	Hydroxyurea	7.81e-08	HSP70	1e-05	59868	0.960516
Combo	K17	Hydroxyurea	1.95e-08	HSP70	1e-05	64826	1.04006
Combo	K18	Hydroxyurea	4.88e-09	HSP70	1e-05	66135	1.06106
Combo	B01	Afuresertib	1e-05	HSP70	1e-05	30867	0.49508
Combo	B02	Afuresertib	3.33e-06	HSP70	1e-05	42803	0.686523
Combo	B03	Afuresertib	1.11e-06	HSP70	1e-05	63373	1.01645
Combo	B04	Afuresertib	3.7e-07	HSP70	1e-05	59213	0.949725
Combo	B05	Afuresertib	1.23e-07	HSP70	1e-05	69118	1.10859
Combo	B06	Afuresertib	4.12e-08	HSP70	1e-05	64170	1.02923
Combo	B13	Linsitinib	1e-05	HSP70	1e-05	5141	0.0824572
Combo	B14	Linsitinib	3.33e-06	HSP70	1e-05	40630	0.65167
Combo	B15	Linsitinib	1.11e-06	HSP70	1e-05	42396	0.679995
Combo	B16	Linsitinib	3.7e-07	HSP70	1e-05	49168	0.788612
Combo	B17	Linsitinib	1.23e-07	HSP70	1e-05	61048	0.979157
Combo	B18	Linsitinib	4.12e-08	HSP70	1e-05	59751	0.958354
Combo	B19	AZD5363	1e-05	HSP70	1e-05	47795	0.76659
Combo	B20	AZD5363	3.33e-06	HSP70	1e-05	55865	0.896026
Combo	B21	AZD5363	1.11e-06	HSP70	1e-05	59583	0.95566
Combo	B22	AZD5363	3.7e-07	HSP70	1e-05	63591	1.01994
Combo	B23	AZD5363	1.23e-07	HSP70	1e-05	69130	1.10879
Combo	B24	AZD5363	4.12e-08	HSP70	1e-05	70269	1.12705
Combo	C01	Alisertib	1e-05	HSP70	1e-05	31679	0.508104
Combo	C02	Alisertib	3.33e-06	HSP70	1e-05	57781	0.926757
Combo	C03	Alisertib	1.11e-06	HSP70	1e-05	57621	0.924191
Combo	C04	Alisertib	3.7e-07	HSP70	1e-05	60725	0.973977
Combo	C05	Alisertib	1.23e-07	HSP70	1e-05	62029	0.994892
Combo	C06	Alisertib	4.12e-08	HSP70	1e-05	53506	0.85819
Combo	C07	Capmatinib	4.84e-06	HSP70	1e-05	76852	1.23264
Combo	C08	Capmatinib	1.61e-06	HSP70	1e-05	76751	1.23102
Combo	C09	Capmatinib	5.38e-07	HSP70	1e-05	69960	1.1221
Combo	C10	Capmatinib	1.79e-07	HSP70	1e-05	74499	1.1949
Combo	C11	Capmatinib	5.98e-08	HSP70	1e-05	74114	1.18872
Combo	C12	Capmatinib	1.99e-08	HSP70	1e-05	76411	1.22557
Combo	C13	Momelotinib	1e-05	HSP70	1e-05	77525	1.24343
Combo	C14	Momelotinib	3.33e-06	HSP70	1e-05	57044	0.914936
Combo	C15	Momelotinib	1.11e-06	HSP70	1e-05	65254	1.04662
Combo	C16	Momelotinib	3.7e-07	HSP70	1e-05	80629	1.29322
Combo	C17	Momelotinib	1.23e-07	HSP70	1e-05	70936	1.13775
Combo	C18	Momelotinib	4.12e-08	HSP70	1e-05	71899	1.1532
Combo	C19	GF-109203	1e-05	HSP70	1e-05	59871	0.960279
Combo	C20	GF-109203	3.33e-06	HSP70	1e-05	73722	1.18244
Combo	C21	GF-109203	1.11e-06	HSP70	1e-05	73494	1.17878
Combo	C22	GF-109203	3.7e-07	HSP70	1e-05	75549	1.21174
Combo	C23	GF-109203	1.23e-07	HSP70	1e-05	69407	1.11323
Combo	C24	GF-109203	4.12e-08	HSP70	1e-05	85683	1.37428
Combo	D01	Venetoclax	1e-05	HSP70	1e-05	52565	0.843097
Combo	D02	Venetoclax	3.33e-06	HSP70	1e-05	53826	0.863323
Combo	D03	Venetoclax	1.11e-06	HSP70	1e-05	73340	1.17631
Combo	D04	Venetoclax	3.7e-07	HSP70	1e-05	77375	1.24103
Combo	D05	Venetoclax	1.23e-07	HSP70	1e-05	71789	1.15143
Combo	D06	Venetoclax	4.12e-08	HSP70	1e-05	69776	1.11915
Combo	D07	Pinometostat	1e-05	HSP70	1e-05	66002	1.05862
Combo	D08	Pinometostat	3.33e-06	HSP70	1e-05	69971	1.12227
Combo	D09	Pinometostat	1.11e-06	HSP70	1e-05	81072	1.30032
Combo	D10	Pinometostat	3.7e-07	HSP70	1e-05	71733	1.15054
Combo	D11	Pinometostat	1.23e-07	HSP70	1e-05	68316	1.09573
Combo	D12	Pinometostat	4.12e-08	HSP70	1e-05	80473	1.29072
Combo	D13	Binimetinib	1e-05	HSP70	1e-05	18262	0.292907
Combo	D14	Binimetinib	3.33e-06	HSP70	1e-05	24948	0.400144
Combo	D15	Binimetinib	1.11e-06	HSP70	1e-05	29124	0.467124
Combo	D16	Binimetinib	3.7e-07	HSP70	1e-05	31986	0.513028
Combo	D17	Binimetinib	1.23e-07	HSP70	1e-05	38524	0.617892
Combo	D18	Binimetinib	4.12e-08	HSP70	1e-05	42155	0.67613
Combo	D19	Midostaurin	1e-05	HSP70	1e-05	28787	0.461719
Combo	D20	Midostaurin	3.33e-06	HSP70	1e-05	63664	1.02112
Combo	D21	Midostaurin	1.11e-06	HSP70	1e-05	77333	1.24035
Combo	D22	Midostaurin	3.7e-07	HSP70	1e-05	74221	1.19044
Combo	D23	Midostaurin	1.23e-07	HSP70	1e-05	74199	1.19009
Combo	D24	Midostaurin	4.12e-08	HSP70	1e-05	73360	1.17663
Combo	E01	Sepantronium	1e-05	HSP70	1e-05	602	0.00965556
Combo	E02	Sepantronium	3.33e-06	HSP70	1e-05	3828	0.0613978
Combo	E03	Sepantronium	1.11e-06	HSP70	1e-05	62624	1.00443
Combo	E04	Sepantronium	3.7e-07	HSP70	1e-05	81951	1.31442
Combo	E05	Sepantronium	1.23e-07	HSP70	1e-05	69493	1.11461
Combo	E06	Sepantronium	4.12e-08	HSP70	1e-05	73468	1.17836
Combo	E07	GDC0994	1e-05	HSP70	1e-05	37190	0.596495
Combo	E08	GDC0994	3.33e-06	HSP70	1e-05	43911	0.704294
Combo	E09	GDC0994	1.11e-06	HSP70	1e-05	45776	0.734207
Combo	E10	GDC0994	3.7e-07	HSP70	1e-05	52939	0.849096
Combo	E11	GDC0994	1.23e-07	HSP70	1e-05	56943	0.913316
Combo	E12	GDC0994	4.12e-08	HSP70	1e-05	61489	0.98623
Combo	E13	Temsirolimus	1e-05	HSP70	1e-05	51121	0.819937
Combo	E14	Temsirolimus	3.33e-06	HSP70	1e-05	69804	1.1196
Combo	E15	Temsirolimus	1.11e-06	HSP70	1e-05	70097	1.1243
Combo	E16	Temsirolimus	3.7e-07	HSP70	1e-05	72870	1.16877
Combo	E17	Temsirolimus	1.23e-07	HSP70	1e-05	72995	1.17078
Combo	E18	Temsirolimus	4.12e-08	HSP70	1e-05	74787	1.19952
Combo	E19	Oprozomib	1e-05	HSP70	1e-05	1046	0.0167769
Combo	E20	Oprozomib	3.33e-06	HSP70	1e-05	926	0.0148522
Combo	E21	Oprozomib	1.11e-06	HSP70	1e-05	1130	0.0181242
Combo	E22	Oprozomib	3.7e-07	HSP70	1e-05	5149	0.0825855
Combo	E23	Oprozomib	1.23e-07	HSP70	1e-05	17170	0.275392
Combo	E24	Oprozomib	4.12e-08	HSP70	1e-05	32206	0.516556
Combo	F01	CPI-203	1e-05	HSP70	1e-05	51829	0.831292
Combo	F02	CPI-203	3.33e-06	HSP70	1e-05	48376	0.775909
Combo	F03	CPI-203	1.11e-06	HSP70	1e-05	56562	0.907206
Combo	F04	CPI-203	3.7e-07	HSP70	1e-05	67284	1.07918
Combo	F05	CPI-203	1.23e-07	HSP70	1e-05	70213	1.12616
Combo	F06	CPI-203	4.12e-08	HSP70	1e-05	65599	1.05215
Combo	F07	Tazemetostat	1e-05	HSP70	1e-05	69944	1.12184
Combo	F08	Tazemetostat	3.33e-06	HSP70	1e-05	81265	1.30342
Combo	F09	Tazemetostat	1.11e-06	HSP70	1e-05	68646	1.10102
Combo	F10	Tazemetostat	3.7e-07	HSP70	1e-05	71343	1.14428
Combo	F11	Tazemetostat	1.23e-07	HSP70	1e-05	71410	1.14535
Combo	F12	Tazemetostat	4.12e-08	HSP70	1e-05	71574	1.14799
Combo	F13	Toremifene	1e-05	HSP70	1e-05	72237	1.15862
Combo	F14	Toremifene	3.33e-06	HSP70	1e-05	72484	1.16258
Combo	F15	Toremifene	1.11e-06	HSP70	1e-05	80500	1.29115
Combo	F16	Toremifene	3.7e-07	HSP70	1e-05	74549	1.1957
Combo	F17	Toremifene	1.23e-07	HSP70	1e-05	73371	1.17681
Combo	F18	Toremifene	4.12e-08	HSP70	1e-05	72142	1.1571
Combo	F19	Tretinoin	1e-05	HSP70	1e-05	63699	1.02168
Combo	F20	Tretinoin	3.33e-06	HSP70	1e-05	60966	0.977842
Combo	F21	Tretinoin	1.11e-06	HSP70	1e-05	67907	1.08917
Combo	F22	Tretinoin	3.7e-07	HSP70	1e-05	72494	1.16274
Combo	F23	Tretinoin	1.23e-07	HSP70	1e-05	82097	1.31676
Combo	F24	Tretinoin	4.12e-08	HSP70	1e-05	77094	1.23652
Combo	G01	AT7519	1e-05	HSP70	1e-05	1473	0.0236256
Combo	G02	AT7519	3.33e-06	HSP70	1e-05	3912	0.0627451
Combo	G03	AT7519	1.11e-06	HSP70	1e-05	6460	0.103613
Combo	G04	AT7519	3.7e-07	HSP70	1e-05	28077	0.450331
Combo	G05	AT7519	1.23e-07	HSP70	1e-05	55625	0.892177
Combo	G06	AT7519	4.12e-08	HSP70	1e-05	68697	1.10184
Combo	G07	GSK503	1e-05	HSP70	1e-05	54904	0.880613
Combo	G08	GSK503	3.33e-06	HSP70	1e-05	60001	0.962364
Combo	G09	GSK503	1.11e-06	HSP70	1e-05	70180	1.12563
Combo	G10	GSK503	3.7e-07	HSP70	1e-05	64133	1.02864
Combo	G11	GSK503	1.23e-07	HSP70	1e-05	65670	1.05329
Combo	G12	GSK503	4.12e-08	HSP70	1e-05	65941	1.05764
Combo	G13	Pictilisib	1e-05	HSP70	1e-05	53246	0.85402
Combo	G14	Pictilisib	3.33e-06	HSP70	1e-05	63993	1.02639
Combo	G15	Pictilisib	1.11e-06	HSP70	1e-05	58679	0.94116
Combo	G16	Pictilisib	3.7e-07	HSP70	1e-05	61853	0.992069
Combo	G17	Pictilisib	1.23e-07	HSP70	1e-05	65684	1.05351
Combo	G18	Pictilisib	4.12e-08	HSP70	1e-05	72470	1.16236
Combo	G19	Imiquimod	1e-05	HSP70	1e-05	65352	1.04819
Combo	G20	Imiquimod	3.33e-06	HSP70	1e-05	61900	0.992822
Combo	G21	Imiquimod	1.11e-06	HSP70	1e-05	68278	1.09512
Combo	G22	Imiquimod	3.7e-07	HSP70	1e-05	67013	1.07483
Combo	G23	Imiquimod	1.23e-07	HSP70	1e-05	65723	1.05414
Combo	G24	Imiquimod	4.12e-08	HSP70	1e-05	67549	1.08343
Combo	H01	Abemaciclib	1e-05	HSP70	1e-05	38362	0.615293
Combo	H02	Abemaciclib	3.33e-06	HSP70	1e-05	33669	0.540022
Combo	H03	Abemaciclib	1.11e-06	HSP70	1e-05	40015	0.641806
Combo	H04	Abemaciclib	3.7e-07	HSP70	1e-05	48791	0.782565
Combo	H05	Abemaciclib	1.23e-07	HSP70	1e-05	56457	0.905521
Combo	H06	Abemaciclib	4.12e-08	HSP70	1e-05	57366	0.920101
Combo	H07	Defactinib	9.79e-06	HSP70	1e-05	77852	1.24868
Combo	H08	Defactinib	3.26e-06	HSP70	1e-05	64020	1.02683
Combo	H09	Defactinib	1.09e-06	HSP70	1e-05	63123	1.01244
Combo	H10	Defactinib	3.63e-07	HSP70	1e-05	68704	1.10195
Combo	H11	Defactinib	1.21e-07	HSP70	1e-05	67448	1.08181
Combo	H12	Defactinib	4.03e-08	HSP70	1e-05	68919	1.1054
Combo	H13	Talazoparib	1e-05	HSP70	1e-05	52183	0.83697
Combo	H14	Talazoparib	3.33e-06	HSP70	1e-05	54877	0.88018
Combo	H15	Talazoparib	1.11e-06	HSP70	1e-05	56548	0.906981
Combo	H16	Talazoparib	3.7e-07	HSP70	1e-05	63752	1.02253
Combo	H17	Talazoparib	1.23e-07	HSP70	1e-05	61530	0.986888
Combo	H18	Talazoparib	4.12e-08	HSP70	1e-05	61323	0.983568
Combo	H19	Nilotinib	1e-05	HSP70	1e-05	67488	1.08245
Combo	H20	Nilotinib	3.33e-06	HSP70	1e-05	60768	0.974666
Combo	H21	Nilotinib	1.11e-06	HSP70	1e-05	61511	0.986583
Combo	H22	Nilotinib	3.7e-07	HSP70	1e-05	67933	1.08959
Combo	H23	Nilotinib	1.23e-07	HSP70	1e-05	62526	1.00286
Combo	H24	Nilotinib	4.12e-08	HSP70	1e-05	71080	1.14006
Combo	I01	Ribociclib	1e-05	HSP70	1e-05	43724	0.701295
Combo	I02	Ribociclib	3.33e-06	HSP70	1e-05	49304	0.790794
Combo	I03	Ribociclib	1.11e-06	HSP70	1e-05	54685	0.8771
Combo	I04	Ribociclib	3.7e-07	HSP70	1e-05	57351	0.91986
Combo	I05	Ribociclib	1.23e-07	HSP70	1e-05	63158	1.013
Combo	I06	Ribociclib	4.12e-08	HSP70	1e-05	68234	1.09441
Combo	I07	Erdafitinib	1e-05	HSP70	1e-05	63364	1.0163
Combo	I08	Erdafitinib	3.33e-06	HSP70	1e-05	64717	1.038
Combo	I09	Erdafitinib	1.11e-06	HSP70	1e-05	72470	1.16236
Combo	I10	Erdafitinib	3.7e-07	HSP70	1e-05	63660	1.02105
Combo	I11	Erdafitinib	1.23e-07	HSP70	1e-05	61213	0.981804
Combo	I12	Erdafitinib	4.12e-08	HSP70	1e-05	73294	1.17557
Combo	I13	GSK2636771	1e-05	HSP70	1e-05	72580	1.16412
Combo	I14	GSK2636771	3.33e-06	HSP70	1e-05	67817	1.08773
Combo	I15	GSK2636771	1.11e-06	HSP70	1e-05	71143	1.14107
Combo	I16	GSK2636771	3.7e-07	HSP70	1e-05	71417	1.14547
Combo	I17	GSK2636771	1.23e-07	HSP70	1e-05	66985	1.07438
Combo	I18	GSK2636771	4.12e-08	HSP70	1e-05	68745	1.10261
Combo	I19	Regorafenib	1e-05	HSP70	1e-05	66515	1.06684
Combo	I20	Regorafenib	3.33e-06	HSP70	1e-05	69040	1.10734
Combo	I21	Regorafenib	1.11e-06	HSP70	1e-05	81493	1.30708
Combo	I22	Regorafenib	3.7e-07	HSP70	1e-05	67147	1.07698
Combo	I23	Regorafenib	1.23e-07	HSP70	1e-05	73906	1.18539
Combo	I24	Regorafenib	4.12e-08	HSP70	1e-05	75466	1.21041
Combo	J01	BML-EI388	1e-05	HSP70	1e-05	76992	1.23489
Combo	J02	BML-EI388	3.33e-06	HSP70	1e-05	65657	1.05308
Combo	J03	BML-EI388	1.11e-06	HSP70	1e-05	69042	1.10737
Combo	J04	BML-EI388	3.7e-07	HSP70	1e-05	80546	1.29189
Combo	J05	BML-EI388	1.23e-07	HSP70	1e-05	70312	1.12774
Combo	J06	BML-EI388	4.12e-08	HSP70	1e-05	71776	1.15122
Combo	J07	Entinostat	1e-05	HSP70	1e-05	10750	0.172421
Combo	J08	Entinostat	3.33e-06	HSP70	1e-05	57458	0.921577
Combo	J09	Entinostat	1.11e-06	HSP70	1e-05	65520	1.05088
Combo	J10	Entinostat	3.7e-07	HSP70	1e-05	64563	1.03553
Combo	J11	Entinostat	1.23e-07	HSP70	1e-05	62949	1.00965
Combo	J12	Entinostat	4.12e-08	HSP70	1e-05	74067	1.18797
Combo	J13	Apitolisib	1e-05	HSP70	1e-05	26016	0.417274
Combo	J14	Apitolisib	3.33e-06	HSP70	1e-05	44608	0.715474
Combo	J15	Apitolisib	1.11e-06	HSP70	1e-05	45246	0.725707
Combo	J16	Apitolisib	3.7e-07	HSP70	1e-05	53289	0.854709
Combo	J17	Apitolisib	1.23e-07	HSP70	1e-05	61670	0.989133
Combo	J18	Apitolisib	4.12e-08	HSP70	1e-05	61778	0.990866
Combo	J19	Afatinib	1e-05	HSP70	1e-05	1167	0.0187177
Combo	J20	Afatinib	3.33e-06	HSP70	1e-05	44361	0.711512
Combo	J21	Afatinib	1.11e-06	HSP70	1e-05	50844	0.815494
Combo	J22	Afatinib	3.7e-07	HSP70	1e-05	55481	0.889867
Combo	J23	Afatinib	1.23e-07	HSP70	1e-05	56716	0.909676
Combo	J24	Afatinib	4.12e-08	HSP70	1e-05	57445	0.921368
Combo	K07	Onalespib	1e-05	HSP70	1e-05	1907	0.0305866
Combo	K08	Onalespib	3.33e-06	HSP70	1e-05	1813	0.029079
Combo	K09	Onalespib	1.11e-06	HSP70	1e-05	3585	0.0575003
Combo	K10	Onalespib	3.7e-07	HSP70	1e-05	25858	0.41474
Combo	K11	Onalespib	1.23e-07	HSP70	1e-05	56943	0.913316
Combo	K12	Onalespib	4.12e-08	HSP70	1e-05	64776	1.03895
Combo	K13	Duvelisib	1e-05	HSP70	1e-05	38556	0.618405
Combo	K14	Duvelisib	3.33e-06	HSP70	1e-05	58697	0.941449
Combo	K15	Duvelisib	1.11e-06	HSP70	1e-05	60102	0.963984
Combo	K16	Duvelisib	3.7e-07	HSP70	1e-05	59573	0.955499
Combo	K17	Duvelisib	1.23e-07	HSP70	1e-05	67798	1.08742
Combo	K18	Duvelisib	4.12e-08	HSP70	1e-05	64080	1.02779
Combo	J07	DMSO	0	HSP70	1e-05	68453	0.973824
Combo	J08	DMSO	0	HSP70	1e-05	72575	1.03246
Combo	J09	DMSO	0	HSP70	1e-05	69245	0.985091
Combo	J10	DMSO	0	HSP70	1e-05	68459	0.973909
Combo	J11	DMSO	0	HSP70	1e-05	71341	1.01491
Combo	J12	DMSO	0	HSP70	1e-05	75957	1.08058
Combo	L01	DMSO	0	HSP70	1e-05	70700	1.1343
Combo	L03	DMSO	0	HSP70	1e-05	65642	1.05315
Combo	L04	DMSO	0	HSP70	1e-05	65922	1.05765
Combo	L05	DMSO	0	HSP70	1e-05	61356	0.984389
Combo	L06	DMSO	0	HSP70	1e-05	58757	0.942691
Combo	L07	DMSO	0	HSP70	1e-05	58074	0.931733
Combo	L08	DMSO	0	HSP70	1e-05	58997	0.946542
Combo	L09	DMSO	0	HSP70	1e-05	57046	0.91524
Combo	L10	DMSO	0	HSP70	1e-05	63204	1.01404
Combo	L11	DMSO	0	HSP70	1e-05	65381	1.04897
Combo	L12	DMSO	0	HSP70	1e-05	62329	1
Combo	L13	PBS	0	HSP70	1e-05	60433	0.962209
Combo	L14	PBS	0	HSP70	1e-05	61326	0.976428
Combo	L15	PBS	0	HSP70	1e-05	66107	1.05255
Combo	L16	PBS	0	HSP70	1e-05	60447	0.962432
Combo	L17	PBS	0	HSP70	1e-05	59323	0.944536
Combo	L18	PBS	0	HSP70	1e-05	66791	1.06344
Combo	L19	PBS	0	HSP70	1e-05	63759	1.01517
Combo	L20	PBS	0	HSP70	1e-05	61087	0.972622
Combo	L21	PBS	0	HSP70	1e-05	65858	1.04859
Combo	L22	PBS	0	HSP70	1e-05	61854	0.984834
Combo	L23	PBS	0	HSP70	1e-05	63811	1.01599
Combo	L24	PBS	0	HSP70	1e-05	74027	1.17865
Combo	L07	DMSO	0	HSP70	1e-05	61898	0.99279
Combo	L08	DMSO	0	HSP70	1e-05	62797	1.00721
Combo	L09	DMSO	0	HSP70	1e-05	56355	0.903885
Combo	L10	DMSO	0	HSP70	1e-05	66401	1.06501
Combo	L11	DMSO	0	HSP70	1e-05	58022	0.930623
Combo	L12	DMSO	0	HSP70	1e-05	60559	0.971314
Combo	L13	DMSO	0	HSP70	1e-05	56897	0.912579
Combo	L14	DMSO	0	HSP70	1e-05	68263	1.09488
Combo	L15	DMSO	0	HSP70	1e-05	62901	1.00888
Combo	L16	DMSO	0	HSP70	1e-05	64184	1.02946
Combo	L17	DMSO	0	HSP70	1e-05	68500	1.09868
Combo	L18	DMSO	0	HSP70	1e-05	59800	0.95914
Combo	A02	Bortezomib	1e-05	HSP70	1e-05	396	0.00563356
Combo	A04	Bortezomib	1e-05	HSP70	1e-05	144	0.00204857
Combo	A12	Bortezomib	1e-05	HSP70	1e-05	558	0.0079382
Combo	A14	Bortezomib	1e-05	HSP70	1e-05	883	0.0125617
Combo	J13	Bortezomib	1e-05	HSP70	1e-05	1062	0.0151082
Combo	J14	Bortezomib	3.33e-06	HSP70	1e-05	1200	0.0170714
Combo	J15	Bortezomib	1.11e-06	HSP70	1e-05	1448	0.0205995
Combo	J16	Bortezomib	3.7e-07	HSP70	1e-05	2223	0.0316248
Combo	J17	Bortezomib	1.23e-07	HSP70	1e-05	3041	0.0432618
Combo	J18	Bortezomib	4.12e-08	HSP70	1e-05	3880	0.0551975
Combo	P02	Bortezomib	1e-05	HSP70	1e-05	818	0.011637
Combo	P04	Bortezomib	1e-05	HSP70	1e-05	425	0.00604612
Combo	P12	Bortezomib	1e-05	HSP70	1e-05	1047	0.0148948
Combo	P14	Bortezomib	1e-05	HSP70	1e-05	1148	0.0163316
Combo	A02	Bortezomib	1e-05	HSP70	1e-05	1257	0.0201672
Combo	A04	Bortezomib	1e-05	HSP70	1e-05	612	0.00981886
Combo	A12	Bortezomib	1e-05	HSP70	1e-05	297	0.00476504
Combo	A14	Bortezomib	5e-06	HSP70	1e-05	829	0.0133004
Combo	I19	Bortezomib	5e-06	HSP70	1e-05	661	0.010605
Combo	I20	Bortezomib	1.25e-06	HSP70	1e-05	1196	0.0191885
Combo	I21	Bortezomib	3.13e-07	HSP70	1e-05	1594	0.025574
Combo	I22	Bortezomib	7.81e-08	HSP70	1e-05	2954	0.0473937
Combo	I23	Bortezomib	1.95e-08	HSP70	1e-05	6569	0.105392
Combo	I24	Bortezomib	4.88e-09	HSP70	1e-05	11419	0.183205
Combo	J19	Bortezomib	5e-06	HSP70	1e-05	464	0.00744437
Combo	J20	Bortezomib	1.25e-06	HSP70	1e-05	742	0.0119046
Combo	J21	Bortezomib	3.13e-07	HSP70	1e-05	1850	0.0296812
Combo	J22	Bortezomib	7.81e-08	HSP70	1e-05	3579	0.0574211
Combo	J23	Bortezomib	1.95e-08	HSP70	1e-05	8419	0.135074
Combo	J24	Bortezomib	4.88e-09	HSP70	1e-05	32705	0.524716
Combo	K19	Bortezomib	5e-06	HSP70	1e-05	803	0.0128832
Combo	K20	Bortezomib	1.25e-06	HSP70	1e-05	1661	0.0266489
Combo	K21	Bortezomib	3.13e-07	HSP70	1e-05	2687	0.0431099
Combo	K22	Bortezomib	7.81e-08	HSP70	1e-05	3935	0.0631327
Combo	K23	Bortezomib	1.95e-08	HSP70	1e-05	14195	0.227743
Combo	K24	Bortezomib	4.88e-09	HSP70	1e-05	38431	0.616583
Combo	P02	Bortezomib	1e-05	HSP70	1e-05	945	0.0151615
Combo	P04	Bortezomib	1e-05	HSP70	1e-05	690	0.0110703
Combo	P12	Bortezomib	1e-05	HSP70	1e-05	957	0.015354
Combo	P14	Bortezomib	5e-06	HSP70	1e-05	1109	0.0177927
Combo	A02	Bortezomib	1e-05	HSP70	1e-05	997	0.015991
Combo	A04	Bortezomib	1e-05	HSP70	1e-05	1212	0.0194394
Combo	A12	Bortezomib	1e-05	HSP70	1e-05	1395	0.0223746
Combo	A14	Bortezomib	1e-05	HSP70	1e-05	798	0.0127992
Combo	K19	Bortezomib	1e-05	HSP70	1e-05	516	0.00827619
Combo	K20	Bortezomib	3.33e-06	HSP70	1e-05	513	0.00822808
Combo	K21	Bortezomib	1.11e-06	HSP70	1e-05	1247	0.0200008
Combo	K22	Bortezomib	3.7e-07	HSP70	1e-05	1591	0.0255183
Combo	K23	Bortezomib	1.23e-07	HSP70	1e-05	2608	0.0418301
Combo	K24	Bortezomib	4.12e-08	HSP70	1e-05	3522	0.0564898
Combo	L19	Bortezomib	1e-05	HSP70	1e-05	835	0.0133927
Combo	L20	Bortezomib	3.33e-06	HSP70	1e-05	730	0.0117086
Combo	L21	Bortezomib	1.11e-06	HSP70	1e-05	1331	0.0213481
Combo	L22	Bortezomib	3.7e-07	HSP70	1e-05	1597	0.0256145
Combo	L23	Bortezomib	1.23e-07	HSP70	1e-05	3169	0.050828
Combo	L24	Bortezomib	4.12e-08	HSP70	1e-05	5397	0.0865632
Combo	P02	Bortezomib	1e-05	HSP70	1e-05	1327	0.0212839
Combo	P04	Bortezomib	1e-05	HSP70	1e-05	1264	0.0202735
Combo	P12	Bortezomib	1e-05	HSP70	1e-05	1216	0.0195036
Combo	P14	Bortezomib	1e-05	HSP70	1e-05	1189	0.0190705
Single	B07	Neratinib	1e-05	DMSO	0	72481	1.0826
Single	B08	Neratinib	3.33e-06	DMSO	0	70432	1.05199
Single	B09	Neratinib	1.11e-06	DMSO	0	70269	1.04956
Single	B10	Neratinib	3.7e-07	DMSO	0	69432	1.03706
Single	B11	Neratinib	1.23e-07	DMSO	0	75256	1.12405
Single	B12	Neratinib	4.12e-08	DMSO	0	101669	1.51856
Single	B13	Ponatinib	1e-05	DMSO	0	83362	1.24512
Single	B14	Ponatinib	3.33e-06	DMSO	0	111351	1.66317
Single	B15	Ponatinib	1.11e-06	DMSO	0	108991	1.62792
Single	B16	Ponatinib	3.7e-07	DMSO	0	105843	1.5809
Single	B17	Ponatinib	1.23e-07	DMSO	0	143926	2.14972
Single	B18	Ponatinib	4.12e-08	DMSO	0	93725	1.3999
Single	B19	NVP-BGT226	1e-05	DMSO	0	79195	1.18288
Single	B20	NVP-BGT226	3.33e-06	DMSO	0	90462	1.35117
Single	B21	NVP-BGT226	1.11e-06	DMSO	0	130685	1.95195
Single	B22	NVP-BGT226	3.7e-07	DMSO	0	94730	1.41492
Single	B23	NVP-BGT226	1.23e-07	DMSO	0	78357	1.17036
Single	B24	NVP-BGT226	4.12e-08	DMSO	0	83190	1.24255
Single	C07	Fulvestrant	1e-05	DMSO	0	49010	0.732028
Single	C08	Fulvestrant	3.33e-06	DMSO	0	65416	0.977073
Single	C09	Fulvestrant	1.11e-06	DMSO	0	69451	1.03734
Single	C10	Fulvestrant	3.7e-07	DMSO	0	69705	1.04113
Single	C11	Fulvestrant	1.23e-07	DMSO	0	62480	0.93322
Single	C12	Fulvestrant	4.12e-08	DMSO	0	80208	1.19801
Single	C13	Sorafenib	1e-05	DMSO	0	76751	1.14638
Single	C14	Sorafenib	3.33e-06	DMSO	0	68587	1.02444
Single	C15	Sorafenib	1.11e-06	DMSO	0	93817	1.40128
Single	C16	Sorafenib	3.7e-07	DMSO	0	83740	1.25077
Single	C17	Sorafenib	1.23e-07	DMSO	0	72105	1.07698
Single	C18	Sorafenib	4.12e-08	DMSO	0	83519	1.24746
Single	C19	Alpelisib	1e-05	DMSO	0	66933	0.999731
Single	C20	Alpelisib	3.33e-06	DMSO	0	66817	0.997999
Single	C21	Alpelisib	1.11e-06	DMSO	0	78935	1.179
Single	C22	Alpelisib	3.7e-07	DMSO	0	68161	1.01807
Single	C23	Alpelisib	1.23e-07	DMSO	0	69904	1.04411
Single	C24	Alpelisib	4.12e-08	DMSO	0	79805	1.19199
Single	D01	Enzalutamide	1e-05	DMSO	0	82174	1.22738
Single	D02	Enzalutamide	3.33e-06	DMSO	0	73132	1.09232
Single	D03	Enzalutamide	1.11e-06	DMSO	0	60883	0.909367
Single	D04	Enzalutamide	3.7e-07	DMSO	0	63546	0.949142
Single	D05	Enzalutamide	1.23e-07	DMSO	0	60411	0.902317
Single	D06	Enzalutamide	4.12e-08	DMSO	0	69072	1.03168
Single	D07	AZD4547	1e-05	DMSO	0	80445	1.20155
Single	D08	AZD4547	3.33e-06	DMSO	0	69659	1.04045
Single	D09	AZD4547	1.11e-06	DMSO	0	59110	0.882884
Single	D10	AZD4547	3.7e-07	DMSO	0	65221	0.97416
Single	D11	AZD4547	1.23e-07	DMSO	0	65860	0.983705
Single	D12	AZD4547	4.12e-08	DMSO	0	83934	1.25366
Single	D13	Teniposide	1e-05	DMSO	0	109921	1.64181
Single	D14	Teniposide	3.33e-06	DMSO	0	102244	1.52715
Single	D15	Teniposide	1.11e-06	DMSO	0	113272	1.69186
Single	D16	Teniposide	3.7e-07	DMSO	0	104445	1.56002
Single	D17	Teniposide	1.23e-07	DMSO	0	105000	1.56831
Single	D18	Teniposide	4.12e-08	DMSO	0	74799	1.11722
Single	D19	AZD6482	1e-05	DMSO	0	69071	1.03166
Single	D20	AZD6482	3.33e-06	DMSO	0	61872	0.924139
Single	D21	AZD6482	1.11e-06	DMSO	0	69054	1.03141
Single	D22	AZD6482	3.7e-07	DMSO	0	62871	0.93906
Single	D23	AZD6482	1.23e-07	DMSO	0	73631	1.09977
Single	D24	AZD6482	4.12e-08	DMSO	0	70039	1.04612
Single	E01	Osimertinib	1e-05	DMSO	0	79002	1.18
Single	E02	Osimertinib	3.33e-06	DMSO	0	75628	1.1296
Single	E03	Osimertinib	1.11e-06	DMSO	0	70863	1.05843
Single	E04	Osimertinib	3.7e-07	DMSO	0	75901	1.13368
Single	E05	Osimertinib	1.23e-07	DMSO	0	72884	1.08862
Single	E06	Osimertinib	4.12e-08	DMSO	0	78969	1.1795
Single	E07	Lucitanib	1e-05	DMSO	0	80687	1.20516
Single	E08	Lucitanib	3.33e-06	DMSO	0	83906	1.25324
Single	E09	Lucitanib	1.11e-06	DMSO	0	70705	1.05607
Single	E10	Lucitanib	3.7e-07	DMSO	0	63746	0.952129
Single	E11	Lucitanib	1.23e-07	DMSO	0	62488	0.933339
Single	E12	Lucitanib	4.12e-08	DMSO	0	68042	1.0163
Single	E13	Cobimetinib	1e-05	DMSO	0	12289	0.183552
Single	E14	Cobimetinib	3.33e-06	DMSO	0	29351	0.438395
Single	E15	Cobimetinib	1.11e-06	DMSO	0	44503	0.66471
Single	E16	Cobimetinib	3.7e-07	DMSO	0	64409	0.962032
Single	E17	Cobimetinib	1.23e-07	DMSO	0	79371	1.18551
Single	E18	Cobimetinib	4.12e-08	DMSO	0	62489	0.933354
Single	E19	Idelalisib	1e-05	DMSO	0	57269	0.855387
Single	E20	Idelalisib	3.33e-06	DMSO	0	66171	0.98835
Single	E21	Idelalisib	1.11e-06	DMSO	0	60080	0.897373
Single	E22	Idelalisib	3.7e-07	DMSO	0	73154	1.09265
Single	E23	Idelalisib	1.23e-07	DMSO	0	66846	0.998432
Single	E24	Idelalisib	4.12e-08	DMSO	0	73353	1.09562
Single	F01	Navitoclax	1e-05	DMSO	0	99426	1.48506
Single	F02	Navitoclax	3.33e-06	DMSO	0	67174	1.00333
Single	F03	Navitoclax	1.11e-06	DMSO	0	68451	1.0224
Single	F04	Navitoclax	3.7e-07	DMSO	0	73401	1.09634
Single	F05	Navitoclax	1.23e-07	DMSO	0	74958	1.11959
Single	F06	Navitoclax	4.12e-08	DMSO	0	74917	1.11898
Single	F07	Dovitinib	1e-05	DMSO	0	75165	1.12269
Single	F08	Dovitinib	3.33e-06	DMSO	0	68388	1.02146
Single	F09	Dovitinib	1.11e-06	DMSO	0	66262	0.989709
Single	F10	Dovitinib	3.7e-07	DMSO	0	72085	1.07668
Single	F11	Dovitinib	1.23e-07	DMSO	0	64201	0.958925
Single	F12	Dovitinib	4.12e-08	DMSO	0	73698	1.10078
Single	F13	Trametinib	1e-05	DMSO	0	48480	0.724112
Single	F14	Trametinib	3.33e-06	DMSO	0	64145	0.958089
Single	F15	Trametinib	1.11e-06	DMSO	0	57049	0.852101
Single	F16	Trametinib	3.7e-07	DMSO	0	57007	0.851473
Single	F17	Trametinib	1.23e-07	DMSO	0	52659	0.78653
Single	F18	Trametinib	4.12e-08	DMSO	0	56799	0.848367
Single	F19	Taselisib	1e-05	DMSO	0	98343	1.46888
Single	F20	Taselisib	3.33e-06	DMSO	0	78910	1.17862
Single	F21	Taselisib	1.11e-06	DMSO	0	80080	1.1961
Single	F22	Taselisib	3.7e-07	DMSO	0	80284	1.19915
Single	F23	Taselisib	1.23e-07	DMSO	0	77704	1.16061
Single	F24	Taselisib	4.12e-08	DMSO	0	73671	1.10037
Single	G01	Axitinib	1e-05	DMSO	0	81651	1.21956
Single	G02	Axitinib	3.33e-06	DMSO	0	75339	1.12529
Single	G03	Axitinib	1.11e-06	DMSO	0	74890	1.11858
Single	G04	Axitinib	3.7e-07	DMSO	0	81330	1.21477
Single	G05	Axitinib	1.23e-07	DMSO	0	72556	1.08372
Single	G06	Axitinib	4.12e-08	DMSO	0	66849	0.998476
Single	G07	Quizartinib	1e-05	DMSO	0	63536	0.948993
Single	G08	Quizartinib	3.33e-06	DMSO	0	61466	0.918074
Single	G09	Quizartinib	1.11e-06	DMSO	0	66015	0.98602
Single	G10	Quizartinib	3.7e-07	DMSO	0	69195	1.03352
Single	G11	Quizartinib	1.23e-07	DMSO	0	76500	1.14263
Single	G12	Quizartinib	4.12e-08	DMSO	0	60013	0.896372
Single	G13	Cabozantinib	1e-05	DMSO	0	68590	1.02448
Single	G14	Cabozantinib	3.33e-06	DMSO	0	73382	1.09606
Single	G15	Cabozantinib	1.11e-06	DMSO	0	75730	1.13113
Single	G16	Cabozantinib	3.7e-07	DMSO	0	74568	1.11377
Single	G17	Cabozantinib	1.23e-07	DMSO	0	68152	1.01794
Single	G18	Cabozantinib	4.12e-08	DMSO	0	68919	1.02939
Single	G19	Rigosertib	1e-05	DMSO	0	84071	1.25571
Single	G20	Rigosertib	3.33e-06	DMSO	0	103139	1.54051
Single	G21	Rigosertib	1.11e-06	DMSO	0	110942	1.65706
Single	G22	Rigosertib	3.7e-07	DMSO	0	116166	1.73509
Single	G23	Rigosertib	1.23e-07	DMSO	0	120042	1.79298
Single	G24	Rigosertib	4.12e-08	DMSO	0	121606	1.81634
Single	H01	Dasatinib	1e-05	DMSO	0	47536	0.710012
Single	H02	Dasatinib	3.33e-06	DMSO	0	58676	0.876402
Single	H03	Dasatinib	1.11e-06	DMSO	0	68573	1.02423
Single	H04	Dasatinib	3.7e-07	DMSO	0	65042	0.971487
Single	H05	Dasatinib	1.23e-07	DMSO	0	51819	0.773984
Single	H06	Dasatinib	4.12e-08	DMSO	0	60731	0.907096
Single	H07	Vorinostat	1e-05	DMSO	0	84932	1.26857
Single	H08	Vorinostat	3.33e-06	DMSO	0	87662	1.30935
Single	H09	Vorinostat	1.11e-06	DMSO	0	65460	0.97773
Single	H10	Vorinostat	3.7e-07	DMSO	0	62470	0.93307
Single	H11	Vorinostat	1.23e-07	DMSO	0	67040	1.00133
Single	H12	Vorinostat	4.12e-08	DMSO	0	69547	1.03877
Single	H13	Everolimus	1e-05	DMSO	0	90676	1.35436
Single	H14	Everolimus	3.33e-06	DMSO	0	85214	1.27278
Single	H15	Everolimus	1.11e-06	DMSO	0	94646	1.41366
Single	H16	Everolimus	3.7e-07	DMSO	0	80067	1.1959
Single	H17	Everolimus	1.23e-07	DMSO	0	79245	1.18363
Single	H18	Everolimus	4.12e-08	DMSO	0	68556	1.02397
Single	H19	Megestrol	1e-05	DMSO	0	73080	1.09154
Single	H20	Megestrol	3.33e-06	DMSO	0	75992	1.13504
Single	H21	Megestrol	1.11e-06	DMSO	0	63337	0.94602
Single	H22	Megestrol	3.7e-07	DMSO	0	73242	1.09396
Single	H23	Megestrol	1.23e-07	DMSO	0	69152	1.03287
Single	H24	Megestrol	4.12e-08	DMSO	0	76733	1.14611
Single	I01	Dabrafenib	1e-05	DMSO	0	73376	1.09597
Single	I02	Dabrafenib	3.33e-06	DMSO	0	73320	1.09513
Single	I03	Dabrafenib	1.11e-06	DMSO	0	86018	1.28479
Single	I04	Dabrafenib	3.7e-07	DMSO	0	112872	1.68589
Single	I05	Dabrafenib	1.23e-07	DMSO	0	108705	1.62365
Single	I06	Dabrafenib	4.12e-08	DMSO	0	92137	1.37619
Single	I07	Belinostat	1e-05	DMSO	0	1595	0.0238234
Single	I08	Belinostat	3.33e-06	DMSO	0	88131	1.31635
Single	I09	Belinostat	1.11e-06	DMSO	0	99689	1.48898
Single	I10	Belinostat	3.7e-07	DMSO	0	92252	1.3779
Single	I11	Belinostat	1.23e-07	DMSO	0	84836	1.26714
Single	I12	Belinostat	4.12e-08	DMSO	0	77162	1.15251
Single	I13	Tamoxifen	1e-05	DMSO	0	64840	0.968469
Single	I14	Tamoxifen	3.33e-06	DMSO	0	62677	0.936162
Single	I15	Tamoxifen	1.11e-06	DMSO	0	69473	1.03767
Single	I16	Tamoxifen	3.7e-07	DMSO	0	66606	0.994847
Single	I17	Tamoxifen	1.23e-07	DMSO	0	58489	0.873609
Single	I18	Tamoxifen	4.12e-08	DMSO	0	65504	0.978387
Single	I19	Sunitinib	1e-05	DMSO	0	71964	1.07488
Single	I20	Sunitinib	3.33e-06	DMSO	0	70062	1.04647
Single	I21	Sunitinib	1.11e-06	DMSO	0	71088	1.06179
Single	I22	Sunitinib	3.7e-07	DMSO	0	72869	1.08839
Single	I23	Sunitinib	1.23e-07	DMSO	0	73251	1.0941
Single	I24	Sunitinib	4.12e-08	DMSO	0	72685	1.08564
Single	J01	Vemurafenib	1e-05	DMSO	0	121877	1.82039
Single	J02	Vemurafenib	3.33e-06	DMSO	0	117738	1.75857
Single	J03	Vemurafenib	1.11e-06	DMSO	0	83739	1.25075
Single	J04	Vemurafenib	3.7e-07	DMSO	0	83444	1.24634
Single	J05	Vemurafenib	1.23e-07	DMSO	0	66438	0.992338
Single	J06	Vemurafenib	4.12e-08	DMSO	0	63557	0.949306
Single	J19	Vismodegib	1e-05	DMSO	0	64695	0.966304
Single	J20	Vismodegib	3.33e-06	DMSO	0	68092	1.01704
Single	J21	Vismodegib	1.11e-06	DMSO	0	67838	1.01325
Single	J22	Vismodegib	3.7e-07	DMSO	0	73913	1.10399
Single	J23	Vismodegib	1.23e-07	DMSO	0	76846	1.14779
Single	J24	Vismodegib	4.12e-08	DMSO	0	88032	1.31487
Single	K01	Ibrutinib	1e-05	DMSO	0	87840	1.312
Single	K02	Ibrutinib	3.33e-06	DMSO	0	80720	1.20566
Single	K03	Ibrutinib	1.11e-06	DMSO	0	77669	1.16009
Single	K04	Ibrutinib	3.7e-07	DMSO	0	64551	0.964153
Single	K05	Ibrutinib	1.23e-07	DMSO	0	66731	0.996714
Single	K06	Ibrutinib	4.12e-08	DMSO	0	69391	1.03644
Single	K07	BMS-754807	1e-05	DMSO	0	82829	1.23716
Single	K08	BMS-754807	3.33e-06	DMSO	0	83021	1.24003
Single	K09	BMS-754807	1.11e-06	DMSO	0	73727	1.10121
Single	K10	BMS-754807	3.7e-07	DMSO	0	60433	0.902645
Single	K11	BMS-754807	1.23e-07	DMSO	0	61914	0.924766
Single	K12	BMS-754807	4.12e-08	DMSO	0	63775	0.952562
Single	K13	MK2206	1e-05	DMSO	0	63459	0.947842
Single	K14	MK2206	3.33e-06	DMSO	0	66608	0.994877
Single	K15	MK2206	1.11e-06	DMSO	0	70212	1.04871
Single	K16	MK2206	3.7e-07	DMSO	0	66034	0.986303
Single	K17	MK2206	1.23e-07	DMSO	0	79040	1.18056
Single	K18	MK2206	4.12e-08	DMSO	0	74728	1.11616
Single	K19	Imatinib	1e-05	DMSO	0	120973	1.80689
Single	K20	Imatinib	3.33e-06	DMSO	0	82603	1.23378
Single	K21	Imatinib	1.11e-06	DMSO	0	71013	1.06067
Single	K22	Imatinib	3.7e-07	DMSO	0	76426	1.14152
Single	K23	Imatinib	1.23e-07	DMSO	0	81231	1.21329
Single	K24	Imatinib	4.12e-08	DMSO	0	88802	1.32637
Single	L01	Celecoxib	1e-05	DMSO	0	93552	1.39732
Single	L02	Celecoxib	3.33e-06	DMSO	0	69251	1.03435
Single	L03	Celecoxib	1.11e-06	DMSO	0	69274	1.0347
Single	L04	Celecoxib	3.7e-07	DMSO	0	75615	1.12941
Single	L05	Celecoxib	1.23e-07	DMSO	0	65250	0.974593
Single	L06	Celecoxib	4.12e-08	DMSO	0	62859	0.938881
Single	L07	Lapatinib	1e-05	DMSO	0	56024	0.836791
Single	L08	Lapatinib	3.33e-06	DMSO	0	65294	0.975251
Single	L09	Lapatinib	1.11e-06	DMSO	0	63663	0.950889
Single	L10	Lapatinib	3.7e-07	DMSO	0	65851	0.98357
Single	L11	Lapatinib	1.23e-07	DMSO	0	65449	0.977566
Single	L12	Lapatinib	4.12e-08	DMSO	0	59532	0.889188
Single	L13	Buparlisib	1e-05	DMSO	0	52568	0.785171
Single	L14	Buparlisib	3.33e-06	DMSO	0	85784	1.2813
Single	L15	Buparlisib	1.11e-06	DMSO	0	72674	1.08548
Single	L16	Buparlisib	3.7e-07	DMSO	0	66370	0.991322
Single	L17	Buparlisib	1.23e-07	DMSO	0	65077	0.972009
Single	L18	Buparlisib	4.12e-08	DMSO	0	65890	0.984153
Single	L19	Cediranib	1e-05	DMSO	0	72793	1.08726
Single	L20	Cediranib	3.33e-06	DMSO	0	60324	0.901017
Single	L21	Cediranib	1.11e-06	DMSO	0	63118	0.942749
Single	L22	Cediranib	3.7e-07	DMSO	0	67407	1.00681
Single	L23	Cediranib	1.23e-07	DMSO	0	72060	1.07631
Single	L24	Cediranib	4.12e-08	DMSO	0	69444	1.03724
Single	M01	Dactolisib	1e-05	DMSO	0	60996	0.911054
Single	M02	Dactolisib	3.33e-06	DMSO	0	83075	1.24083
Single	M03	Dactolisib	1.11e-06	DMSO	0	77864	1.163
Single	M04	Dactolisib	3.7e-07	DMSO	0	75138	1.12228
Single	M05	Dactolisib	1.23e-07	DMSO	0	70560	1.05391
Single	M06	Dactolisib	4.12e-08	DMSO	0	65362	0.976266
Single	M07	Ruxolitinib	1e-05	DMSO	0	88856	1.32718
Single	M08	Ruxolitinib	3.33e-06	DMSO	0	75163	1.12266
Single	M09	Ruxolitinib	1.11e-06	DMSO	0	68464	1.0226
Single	M10	Ruxolitinib	3.7e-07	DMSO	0	71708	1.07105
Single	M11	Ruxolitinib	1.23e-07	DMSO	0	64719	0.966662
Single	M12	Ruxolitinib	4.12e-08	DMSO	0	61221	0.914415
Single	M13	Olaparib	1e-05	DMSO	0	82928	1.23864
Single	M14	Olaparib	3.33e-06	DMSO	0	67738	1.01175
Single	M15	Olaparib	1.11e-06	DMSO	0	63520	0.948754
Single	M16	Olaparib	3.7e-07	DMSO	0	59227	0.884632
Single	M17	Olaparib	1.23e-07	DMSO	0	62978	0.940658
Single	M18	Olaparib	4.12e-08	DMSO	0	64843	0.968514
Single	M19	Vandetanib	1e-05	DMSO	0	44843	0.669788
Single	M20	Vandetanib	3.33e-06	DMSO	0	55603	0.830503
Single	M21	Vandetanib	1.11e-06	DMSO	0	62479	0.933205
Single	M22	Vandetanib	3.7e-07	DMSO	0	62574	0.934624
Single	M23	Vandetanib	1.23e-07	DMSO	0	57473	0.858434
Single	M24	Vandetanib	4.12e-08	DMSO	0	75651	1.12995
Single	N01	Erlotinib	1e-05	DMSO	0	81477	1.21696
Single	N02	Erlotinib	3.33e-06	DMSO	0	67385	1.00648
Single	N03	Erlotinib	1.11e-06	DMSO	0	66679	0.995937
Single	N04	Erlotinib	3.7e-07	DMSO	0	60753	0.907425
Single	N05	Erlotinib	1.23e-07	DMSO	0	57667	0.861331
Single	N06	Erlotinib	4.12e-08	DMSO	0	65023	0.971203
Single	N07	Palbociclib	1e-05	DMSO	0	78746	1.17617
Single	N08	Palbociclib	3.33e-06	DMSO	0	88865	1.32731
Single	N09	Palbociclib	1.11e-06	DMSO	0	69978	1.04521
Single	N10	Palbociclib	3.7e-07	DMSO	0	74826	1.11762
Single	N11	Palbociclib	1.23e-07	DMSO	0	67661	1.0106
Single	N12	Palbociclib	4.12e-08	DMSO	0	70316	1.05026
Single	N13	Rucaparib	1e-05	DMSO	0	66576	0.994399
Single	N14	Rucaparib	3.33e-06	DMSO	0	67480	1.0079
Single	N15	Rucaparib	1.11e-06	DMSO	0	66478	0.992935
Single	N16	Rucaparib	3.7e-07	DMSO	0	68898	1.02908
Single	N17	Rucaparib	1.23e-07	DMSO	0	83344	1.24485
Single	N18	Rucaparib	4.12e-08	DMSO	0	66226	0.989171
Single	N19	AZD1775	1e-05	DMSO	0	67208	1.00384
Single	N20	AZD1775	3.33e-06	DMSO	0	58869	0.879285
Single	N21	AZD1775	1.11e-06	DMSO	0	73016	1.09059
Single	N22	AZD1775	3.7e-07	DMSO	0	75559	1.12857
Single	N23	AZD1775	1.23e-07	DMSO	0	63691	0.951308
Single	N24	AZD1775	4.12e-08	DMSO	0	75885	1.13344
Single	O07	Pazopanib	1e-05	DMSO	0	73692	1.10069
Single	O08	Pazopanib	3.33e-06	DMSO	0	70669	1.05553
Single	O09	Pazopanib	1.11e-06	DMSO	0	67511	1.00836
Single	O10	Pazopanib	3.7e-07	DMSO	0	67492	1.00808
Single	O11	Pazopanib	1.23e-07	DMSO	0	68737	1.02668
Single	O12	Pazopanib	4.12e-08	DMSO	0	75083	1.12146
Single	O13	Veliparib	1e-05	DMSO	0	73199	1.09332
Single	O14	Veliparib	3.33e-06	DMSO	0	78180	1.16772
Single	O15	Veliparib	1.11e-06	DMSO	0	79229	1.18339
Single	O16	Veliparib	3.7e-07	DMSO	0	71915	1.07414
Single	O17	Veliparib	1.23e-07	DMSO	0	64816	0.968111
Single	O18	Veliparib	4.12e-08	DMSO	0	72776	1.087
Single	O19	Poziotinib	1e-05	DMSO	0	69171	1.03316
Single	O20	Poziotinib	3.33e-06	DMSO	0	74655	1.11507
Single	O21	Poziotinib	1.11e-06	DMSO	0	63615	0.950173
Single	O22	Poziotinib	3.7e-07	DMSO	0	68190	1.01851
Single	O23	Poziotinib	1.23e-07	DMSO	0	67592	1.00957
Single	O24	Poziotinib	4.12e-08	DMSO	0	78341	1.17012
Single	C01	Busulfan	5e-06	DMSO	0	90394	1.49037
Single	C02	Busulfan	1.25e-06	DMSO	0	123576	2.03746
Single	C03	Busulfan	3.13e-07	DMSO	0	113272	1.86757
Single	C04	Busulfan	7.81e-08	DMSO	0	73428	1.21064
Single	C05	Busulfan	1.95e-08	DMSO	0	78858	1.30017
Single	C06	Busulfan	4.88e-09	DMSO	0	107918	1.7793
Single	C07	Doxorubicin	5e-06	DMSO	0	1304	0.0214997
Single	C08	Doxorubicin	1.25e-06	DMSO	0	64861	1.0694
Single	C09	Doxorubicin	3.13e-07	DMSO	0	92374	1.52302
Single	C10	Doxorubicin	7.81e-08	DMSO	0	90476	1.49172
Single	C11	Doxorubicin	1.95e-08	DMSO	0	72523	1.19572
Single	C12	Doxorubicin	4.88e-09	DMSO	0	65018	1.07198
Single	C13	Allopurinol	5e-06	DMSO	0	82886	1.36658
Single	C14	Allopurinol	1.25e-06	DMSO	0	67314	1.10984
Single	C15	Allopurinol	3.13e-07	DMSO	0	66901	1.10303
Single	C16	Allopurinol	7.81e-08	DMSO	0	64480	1.06311
Single	C17	Allopurinol	1.95e-08	DMSO	0	63201	1.04203
Single	C18	Allopurinol	4.88e-09	DMSO	0	60764	1.00185
Single	D01	Cyclophosphamide	5e-06	DMSO	0	112542	1.85554
Single	D02	Cyclophosphamide	1.25e-06	DMSO	0	139471	2.29953
Single	D03	Cyclophosphamide	3.13e-07	DMSO	0	123473	2.03576
Single	D04	Cyclophosphamide	7.81e-08	DMSO	0	142324	2.34657
Single	D05	Cyclophosphamide	1.95e-08	DMSO	0	60880	1.00376
Single	D06	Cyclophosphamide	4.88e-09	DMSO	0	94730	1.56186
Single	D07	Epirubicin	5e-06	DMSO	0	2593	0.0427521
Single	D08	Epirubicin	1.25e-06	DMSO	0	1146	0.0188947
Single	D09	Epirubicin	3.13e-07	DMSO	0	99150	1.63474
Single	D10	Epirubicin	7.81e-08	DMSO	0	82369	1.35806
Single	D11	Epirubicin	1.95e-08	DMSO	0	65711	1.08341
Single	D12	Epirubicin	4.88e-09	DMSO	0	67052	1.10552
Single	D13	Pentostatin	5e-06	DMSO	0	64130	1.05734
Single	D14	Pentostatin	1.25e-06	DMSO	0	53166	0.876575
Single	D15	Pentostatin	3.13e-07	DMSO	0	52901	0.872205
Single	D16	Pentostatin	7.81e-08	DMSO	0	67892	1.11937
Single	D17	Pentostatin	1.95e-08	DMSO	0	70389	1.16054
Single	D18	Pentostatin	4.88e-09	DMSO	0	66668	1.09919
Single	D19	Mitomycin	5e-06	DMSO	0	27843	0.459062
Single	D20	Mitomycin	1.25e-06	DMSO	0	101394	1.67173
Single	D21	Mitomycin	3.13e-07	DMSO	0	104144	1.71707
Single	D22	Mitomycin	7.81e-08	DMSO	0	76385	1.2594
Single	D23	Mitomycin	1.95e-08	DMSO	0	71603	1.18055
Single	D24	Mitomycin	4.88e-09	DMSO	0	83740	1.38066
Single	E01	Temozolomide	5e-06	DMSO	0	128568	2.11977
Single	E02	Temozolomide	1.25e-06	DMSO	0	122022	2.01184
Single	E03	Temozolomide	3.13e-07	DMSO	0	126023	2.0778
Single	E04	Temozolomide	7.81e-08	DMSO	0	97482	1.60723
Single	E05	Temozolomide	1.95e-08	DMSO	0	69548	1.14667
Single	E06	Temozolomide	4.88e-09	DMSO	0	77398	1.2761
Single	E07	Ethinyl estradiol	5e-06	DMSO	0	75464	1.24421
Single	E08	Ethinyl estradiol	1.25e-06	DMSO	0	62493	1.03035
Single	E09	Ethinyl estradiol	3.13e-07	DMSO	0	63331	1.04417
Single	E10	Ethinyl estradiol	7.81e-08	DMSO	0	62488	1.03027
Single	E11	Ethinyl estradiol	1.95e-08	DMSO	0	61658	1.01659
Single	E12	Ethinyl estradiol	4.88e-09	DMSO	0	72560	1.19633
Single	E13	Cytarabine	5e-06	DMSO	0	74634	1.23053
Single	E14	Cytarabine	1.25e-06	DMSO	0	104547	1.72372
Single	E15	Cytarabine	3.13e-07	DMSO	0	85280	1.40605
Single	E16	Cytarabine	7.81e-08	DMSO	0	63681	1.04994
Single	E17	Cytarabine	1.95e-08	DMSO	0	63350	1.04448
Single	E18	Cytarabine	4.88e-09	DMSO	0	60516	0.997758
Single	E19	Cisplatin	1.5e-06	DMSO	0	70169	1.18615
Single	E20	Cisplatin	3.75e-07	DMSO	0	58851	0.994827
Single	E21	Cisplatin	9.38e-08	DMSO	0	65088	1.10026
Single	E22	Cisplatin	2.34e-08	DMSO	0	72989	1.23382
Single	E23	Cisplatin	5.86e-09	DMSO	0	69095	1.16799
Single	E24	Cisplatin	1.46e-09	DMSO	0	71306	1.20537
Single	F01	Pemetrexed	5e-06	DMSO	0	128756	2.17651
Single	F02	Pemetrexed	1.25e-06	DMSO	0	130026	2.19798
Single	F03	Pemetrexed	3.13e-07	DMSO	0	123680	2.09071
Single	F04	Pemetrexed	7.81e-08	DMSO	0	128260	2.16813
Single	F05	Pemetrexed	1.95e-08	DMSO	0	135382	2.28852
Single	F06	Pemetrexed	4.88e-09	DMSO	0	98616	1.66702
Single	F07	Cabazitaxel	5e-06	DMSO	0	108824	1.79424
Single	F08	Cabazitaxel	1.25e-06	DMSO	0	106471	1.75544
Single	F09	Cabazitaxel	3.13e-07	DMSO	0	94748	1.56216
Single	F10	Cabazitaxel	7.81e-08	DMSO	0	99134	1.63447
Single	F11	Cabazitaxel	1.95e-08	DMSO	0	101486	1.67325
Single	F12	Cabazitaxel	4.88e-09	DMSO	0	76584	1.26268
Single	F13	Topotecan	5e-06	DMSO	0	95180	1.56928
Single	F14	Topotecan	1.25e-06	DMSO	0	111811	1.84348
Single	F15	Topotecan	3.13e-07	DMSO	0	103841	1.71208
Single	F16	Topotecan	7.81e-08	DMSO	0	87617	1.44459
Single	F17	Topotecan	1.95e-08	DMSO	0	89386	1.47375
Single	F18	Topotecan	4.88e-09	DMSO	0	73021	1.20393
Single	F19	Altretamine	5e-06	DMSO	0	64760	1.06773
Single	F20	Altretamine	1.25e-06	DMSO	0	61637	1.01624
Single	F21	Altretamine	3.13e-07	DMSO	0	68280	1.12577
Single	F22	Altretamine	7.81e-08	DMSO	0	66743	1.10043
Single	F23	Altretamine	1.95e-08	DMSO	0	67657	1.11549
Single	F24	Altretamine	4.88e-09	DMSO	0	83207	1.37188
Single	G01	Pralatrexate	5e-06	DMSO	0	114908	1.89455
Single	G02	Pralatrexate	1.25e-06	DMSO	0	111247	1.83419
Single	G03	Pralatrexate	3.13e-07	DMSO	0	102891	1.69642
Single	G04	Pralatrexate	7.81e-08	DMSO	0	102060	1.68271
Single	G05	Pralatrexate	1.95e-08	DMSO	0	104552	1.7238
Single	G06	Pralatrexate	4.88e-09	DMSO	0	113533	1.87188
Single	G07	Docetaxel	5e-06	DMSO	0	93863	1.54757
Single	G08	Docetaxel	1.25e-06	DMSO	0	95433	1.57345
Single	G09	Docetaxel	3.13e-07	DMSO	0	89474	1.4752
Single	G10	Docetaxel	7.81e-08	DMSO	0	81200	1.33879
Single	G11	Docetaxel	1.95e-08	DMSO	0	95650	1.57703
Single	G12	Docetaxel	4.88e-09	DMSO	0	88845	1.46483
Single	G13	Idarubicin	5e-06	DMSO	0	1399	0.023066
Single	G14	Idarubicin	1.25e-06	DMSO	0	2129	0.0351019
Single	G15	Idarubicin	3.13e-07	DMSO	0	24247	0.399772
Single	G16	Idarubicin	7.81e-08	DMSO	0	88655	1.4617
Single	G17	Idarubicin	1.95e-08	DMSO	0	89464	1.47504
Single	G18	Idarubicin	4.88e-09	DMSO	0	60290	0.994032
Single	G19	Bleomycin	5e-06	DMSO	0	59629	0.983133
Single	G20	Bleomycin	1.25e-06	DMSO	0	65713	1.08344
Single	G21	Bleomycin	3.13e-07	DMSO	0	60764	1.00185
Single	G22	Bleomycin	7.81e-08	DMSO	0	62113	1.02409
Single	G23	Bleomycin	1.95e-08	DMSO	0	68868	1.13546
Single	G24	Bleomycin	4.88e-09	DMSO	0	79278	1.3071
Single	H01	Methotrexate	5e-06	DMSO	0	105144	1.73356
Single	H02	Methotrexate	1.25e-06	DMSO	0	115598	1.90592
Single	H03	Methotrexate	3.13e-07	DMSO	0	121866	2.00927
Single	H04	Methotrexate	7.81e-08	DMSO	0	118647	1.95619
Single	H05	Methotrexate	1.95e-08	DMSO	0	75173	1.23942
Single	H06	Methotrexate	4.88e-09	DMSO	0	67246	1.10872
Single	H07	Ixabepilone	5e-06	DMSO	0	92340	1.52246
Single	H08	Ixabepilone	1.25e-06	DMSO	0	93163	1.53603
Single	H09	Ixabepilone	3.13e-07	DMSO	0	92788	1.52984
Single	H10	Ixabepilone	7.81e-08	DMSO	0	107735	1.77628
Single	H11	Ixabepilone	1.95e-08	DMSO	0	109167	1.79989
Single	H12	Ixabepilone	4.88e-09	DMSO	0	66841	1.10204
Single	H13	Daunorubicin	5e-06	DMSO	0	918	0.0151355
Single	H14	Daunorubicin	1.25e-06	DMSO	0	6547	0.107944
Single	H15	Daunorubicin	3.13e-07	DMSO	0	76868	1.26736
Single	H16	Daunorubicin	7.81e-08	DMSO	0	77261	1.27384
Single	H17	Daunorubicin	1.95e-08	DMSO	0	60814	1.00267
Single	H18	Daunorubicin	4.88e-09	DMSO	0	60932	1.00462
Single	H19	SN-38	5e-06	DMSO	0	90344	1.48955
Single	H20	SN-38	1.25e-06	DMSO	0	102249	1.68583
Single	H21	SN-38	3.13e-07	DMSO	0	103802	1.71144
Single	H22	SN-38	7.81e-08	DMSO	0	96920	1.59797
Single	H23	SN-38	1.95e-08	DMSO	0	100583	1.65836
Single	H24	SN-38	4.88e-09	DMSO	0	102894	1.69647
Single	I01	Fluorouracil	5e-06	DMSO	0	177237	2.9222
Single	I02	Fluorouracil	1.25e-06	DMSO	0	138477	2.28314
Single	I03	Fluorouracil	3.13e-07	DMSO	0	98009	1.61592
Single	I04	Fluorouracil	7.81e-08	DMSO	0	77950	1.2852
Single	I05	Fluorouracil	1.95e-08	DMSO	0	68876	1.13559
Single	I06	Fluorouracil	4.88e-09	DMSO	0	110010	1.81379
Single	I07	Vinorelbine	5e-06	DMSO	0	75848	1.25054
Single	I08	Vinorelbine	1.25e-06	DMSO	0	108288	1.7854
Single	I09	Vinorelbine	3.13e-07	DMSO	0	122095	2.01304
Single	I10	Vinorelbine	7.81e-08	DMSO	0	111373	1.83626
Single	I11	Vinorelbine	1.95e-08	DMSO	0	105025	1.7316
Single	I12	Vinorelbine	4.88e-09	DMSO	0	68042	1.12184
Single	I13	Etoposide	5e-06	DMSO	0	96403	1.58944
Single	I14	Etoposide	1.25e-06	DMSO	0	88063	1.45194
Single	I15	Etoposide	3.13e-07	DMSO	0	74062	1.2211
Single	I16	Etoposide	7.81e-08	DMSO	0	62221	1.02587
Single	I17	Etoposide	1.95e-08	DMSO	0	60175	0.992135
Single	I18	Etoposide	4.88e-09	DMSO	0	65099	1.07332
Single	J01	Gemcitabine	5e-06	DMSO	0	58398	0.962837
Single	J02	Gemcitabine	1.25e-06	DMSO	0	56314	0.928477
Single	J03	Gemcitabine	3.13e-07	DMSO	0	58963	0.972153
Single	J04	Gemcitabine	7.81e-08	DMSO	0	52710	0.869056
Single	J05	Gemcitabine	1.95e-08	DMSO	0	52096	0.858933
Single	J06	Gemcitabine	4.88e-09	DMSO	0	65049	1.0725
Single	J07	Vinblastine	5e-06	DMSO	0	97143	1.60165
Single	J08	Vinblastine	1.25e-06	DMSO	0	109929	1.81245
Single	J09	Vinblastine	3.13e-07	DMSO	0	120902	1.99337
Single	J10	Vinblastine	7.81e-08	DMSO	0	107869	1.77849
Single	J11	Vinblastine	1.95e-08	DMSO	0	98262	1.62009
Single	J12	Vinblastine	4.88e-09	DMSO	0	71783	1.18352
Single	J13	Paclitaxel	5e-06	DMSO	0	84872	1.39933
Single	J14	Paclitaxel	1.25e-06	DMSO	0	100327	1.65414
Single	J15	Paclitaxel	3.13e-07	DMSO	0	97748	1.61162
Single	J16	Paclitaxel	7.81e-08	DMSO	0	79062	1.30353
Single	J17	Paclitaxel	1.95e-08	DMSO	0	65426	1.07871
Single	J18	Paclitaxel	4.88e-09	DMSO	0	65419	1.0786
Single	K01	Vincristine	5e-06	DMSO	0	99182	1.63526
Single	K02	Vincristine	1.25e-06	DMSO	0	95779	1.57916
Single	K03	Vincristine	3.13e-07	DMSO	0	102690	1.6931
Single	K04	Vincristine	7.81e-08	DMSO	0	113742	1.87532
Single	K05	Vincristine	1.95e-08	DMSO	0	105212	1.73468
Single	K06	Vincristine	4.88e-09	DMSO	0	106324	1.75302
Single	K07	Carfilzomib	5e-06	DMSO	0	1290	0.0212689
Single	K08	Carfilzomib	1.25e-06	DMSO	0	970	0.0159929
Single	K09	Carfilzomib	3.13e-07	DMSO	0	3281	0.0540955
Single	K10	Carfilzomib	7.81e-08	DMSO	0	40200	0.662798
Single	K11	Carfilzomib	1.95e-08	DMSO	0	59769	0.985442
Single	K12	Carfilzomib	4.88e-09	DMSO	0	60815	1.00269
Single	K13	Hydroxyurea	5e-06	DMSO	0	62918	1.03736
Single	K14	Hydroxyurea	1.25e-06	DMSO	0	61132	1.00791
Single	K15	Hydroxyurea	3.13e-07	DMSO	0	68052	1.12201
Single	K16	Hydroxyurea	7.81e-08	DMSO	0	63477	1.04658
Single	K17	Hydroxyurea	1.95e-08	DMSO	0	61467	1.01344
Single	K18	Hydroxyurea	4.88e-09	DMSO	0	57284	0.94447
Single	B01	Afuresertib	1e-05	DMSO	0	87127	1.47994
Single	B02	Afuresertib	3.33e-06	DMSO	0	112128	1.90461
Single	B03	Afuresertib	1.11e-06	DMSO	0	87889	1.49288
Single	B04	Afuresertib	3.7e-07	DMSO	0	79642	1.3528
Single	B05	Afuresertib	1.23e-07	DMSO	0	77585	1.31786
Single	B06	Afuresertib	4.12e-08	DMSO	0	59279	1.00691
Single	B13	Linsitinib	1e-05	DMSO	0	14966	0.254213
Single	B14	Linsitinib	3.33e-06	DMSO	0	63892	1.08527
Single	B15	Linsitinib	1.11e-06	DMSO	0	68472	1.16307
Single	B16	Linsitinib	3.7e-07	DMSO	0	60627	1.02981
Single	B17	Linsitinib	1.23e-07	DMSO	0	66805	1.13475
Single	B18	Linsitinib	4.12e-08	DMSO	0	74746	1.26964
Single	B19	AZD5363	1e-05	DMSO	0	105577	1.79333
Single	B20	AZD5363	3.33e-06	DMSO	0	103457	1.75732
Single	B21	AZD5363	1.11e-06	DMSO	0	96468	1.63861
Single	B22	AZD5363	3.7e-07	DMSO	0	81839	1.39012
Single	B23	AZD5363	1.23e-07	DMSO	0	73635	1.25076
Single	B24	AZD5363	4.12e-08	DMSO	0	73450	1.24762
Single	C01	Alisertib	1e-05	DMSO	0	112981	1.9191
Single	C02	Alisertib	3.33e-06	DMSO	0	126813	2.15405
Single	C03	Alisertib	1.11e-06	DMSO	0	123742	2.10188
Single	C04	Alisertib	3.7e-07	DMSO	0	115076	1.95468
Single	C05	Alisertib	1.23e-07	DMSO	0	107935	1.83338
Single	C06	Alisertib	4.12e-08	DMSO	0	76607	1.30125
Single	C07	Capmatinib	4.84e-06	DMSO	0	72866	1.2377
Single	C08	Capmatinib	1.61e-06	DMSO	0	64882	1.10209
Single	C09	Capmatinib	5.38e-07	DMSO	0	65138	1.10643
Single	C10	Capmatinib	1.79e-07	DMSO	0	64491	1.09544
Single	C11	Capmatinib	5.98e-08	DMSO	0	71018	1.20631
Single	C12	Capmatinib	1.99e-08	DMSO	0	60374	1.02551
Single	C13	Momelotinib	1e-05	DMSO	0	73266	1.2445
Single	C14	Momelotinib	3.33e-06	DMSO	0	64932	1.10294
Single	C15	Momelotinib	1.11e-06	DMSO	0	71869	1.22077
Single	C16	Momelotinib	3.7e-07	DMSO	0	60875	1.03402
Single	C17	Momelotinib	1.23e-07	DMSO	0	60503	1.0277
Single	C18	Momelotinib	4.12e-08	DMSO	0	61687	1.04782
Single	C19	GF-109203	1e-05	DMSO	0	74633	1.26772
Single	C20	GF-109203	3.33e-06	DMSO	0	69559	1.18153
Single	C21	GF-109203	1.11e-06	DMSO	0	76051	1.2918
Single	C22	GF-109203	3.7e-07	DMSO	0	69386	1.17859
Single	C23	GF-109203	1.23e-07	DMSO	0	64089	1.08862
Single	C24	GF-109203	4.12e-08	DMSO	0	84086	1.42829
Single	D01	Venetoclax	1e-05	DMSO	0	126809	2.15398
Single	D02	Venetoclax	3.33e-06	DMSO	0	103793	1.76303
Single	D03	Venetoclax	1.11e-06	DMSO	0	62739	1.06568
Single	D04	Venetoclax	3.7e-07	DMSO	0	67678	1.14958
Single	D05	Venetoclax	1.23e-07	DMSO	0	63366	1.07634
Single	D06	Venetoclax	4.12e-08	DMSO	0	64430	1.09441
Single	D07	Pinometostat	1e-05	DMSO	0	63437	1.07754
Single	D08	Pinometostat	3.33e-06	DMSO	0	67106	1.13986
Single	D09	Pinometostat	1.11e-06	DMSO	0	66379	1.12751
Single	D10	Pinometostat	3.7e-07	DMSO	0	73996	1.2569
Single	D11	Pinometostat	1.23e-07	DMSO	0	56690	0.962937
Single	D12	Pinometostat	4.12e-08	DMSO	0	63099	1.0718
Single	D13	Binimetinib	1e-05	DMSO	0	52428	0.890542
Single	D14	Binimetinib	3.33e-06	DMSO	0	51016	0.866558
Single	D15	Binimetinib	1.11e-06	DMSO	0	56308	0.956448
Single	D16	Binimetinib	3.7e-07	DMSO	0	65901	1.11939
Single	D17	Binimetinib	1.23e-07	DMSO	0	60168	1.02201
Single	D18	Binimetinib	4.12e-08	DMSO	0	66717	1.13326
Single	D19	Midostaurin	1e-05	DMSO	0	103489	1.75786
Single	D20	Midostaurin	3.33e-06	DMSO	0	72841	1.23728
Single	D21	Midostaurin	1.11e-06	DMSO	0	63933	1.08597
Single	D22	Midostaurin	3.7e-07	DMSO	0	58005	0.985273
Single	D23	Midostaurin	1.23e-07	DMSO	0	66282	1.12587
Single	D24	Midostaurin	4.12e-08	DMSO	0	68241	1.15914
Single	E01	Sepantronium	1e-05	DMSO	0	2858	0.048546
Single	E02	Sepantronium	3.33e-06	DMSO	0	43415	0.737447
Single	E03	Sepantronium	1.11e-06	DMSO	0	104127	1.7687
Single	E04	Sepantronium	3.7e-07	DMSO	0	92622	1.57328
Single	E05	Sepantronium	1.23e-07	DMSO	0	73301	1.24509
Single	E06	Sepantronium	4.12e-08	DMSO	0	61013	1.03637
Single	E07	GDC0994	1e-05	DMSO	0	61704	1.0481
Single	E08	GDC0994	3.33e-06	DMSO	0	57628	0.978869
Single	E09	GDC0994	1.11e-06	DMSO	0	50145	0.851763
Single	E10	GDC0994	3.7e-07	DMSO	0	55733	0.946681
Single	E11	GDC0994	1.23e-07	DMSO	0	49990	0.84913
Single	E12	GDC0994	4.12e-08	DMSO	0	53636	0.911061
Single	E13	Temsirolimus	1e-05	DMSO	0	79437	1.34932
Single	E14	Temsirolimus	3.33e-06	DMSO	0	85882	1.45879
Single	E15	Temsirolimus	1.11e-06	DMSO	0	79646	1.35287
Single	E16	Temsirolimus	3.7e-07	DMSO	0	81670	1.38725
Single	E17	Temsirolimus	1.23e-07	DMSO	0	81045	1.37663
Single	E18	Temsirolimus	4.12e-08	DMSO	0	64197	1.09045
Single	E19	Oprozomib	1e-05	DMSO	0	1195	0.0202983
Single	E20	Oprozomib	3.33e-06	DMSO	0	739	0.0125527
Single	E21	Oprozomib	1.11e-06	DMSO	0	790	0.0134189
Single	E22	Oprozomib	3.7e-07	DMSO	0	2890	0.0490896
Single	E23	Oprozomib	1.23e-07	DMSO	0	13917	0.236394
Single	E24	Oprozomib	4.12e-08	DMSO	0	26446	0.449212
Single	F01	CPI-203	1e-05	DMSO	0	102657	1.74373
Single	F02	CPI-203	3.33e-06	DMSO	0	127923	2.1729
Single	F03	CPI-203	1.11e-06	DMSO	0	134061	2.27716
Single	F04	CPI-203	3.7e-07	DMSO	0	134546	2.2854
Single	F05	CPI-203	1.23e-07	DMSO	0	119064	2.02242
Single	F06	CPI-203	4.12e-08	DMSO	0	121240	2.05938
Single	F07	Tazemetostat	1e-05	DMSO	0	70892	1.20417
Single	F08	Tazemetostat	3.33e-06	DMSO	0	68475	1.16312
Single	F09	Tazemetostat	1.11e-06	DMSO	0	70439	1.19648
Single	F10	Tazemetostat	3.7e-07	DMSO	0	69139	1.1744
Single	F11	Tazemetostat	1.23e-07	DMSO	0	59200	1.00557
Single	F12	Tazemetostat	4.12e-08	DMSO	0	56109	0.953068
Single	F13	Toremifene	1e-05	DMSO	0	64012	1.08731
Single	F14	Toremifene	3.33e-06	DMSO	0	60968	1.0356
Single	F15	Toremifene	1.11e-06	DMSO	0	60374	1.02551
Single	F16	Toremifene	3.7e-07	DMSO	0	60464	1.02704
Single	F17	Toremifene	1.23e-07	DMSO	0	64888	1.10219
Single	F18	Toremifene	4.12e-08	DMSO	0	60491	1.0275
Single	F19	Tretinoin	1e-05	DMSO	0	64674	1.09855
Single	F20	Tretinoin	3.33e-06	DMSO	0	58392	0.991847
Single	F21	Tretinoin	1.11e-06	DMSO	0	64124	1.08921
Single	F22	Tretinoin	3.7e-07	DMSO	0	64665	1.0984
Single	F23	Tretinoin	1.23e-07	DMSO	0	65184	1.10722
Single	F24	Tretinoin	4.12e-08	DMSO	0	65842	1.11839
Single	G01	AT7519	1e-05	DMSO	0	2554	0.0433823
Single	G02	AT7519	3.33e-06	DMSO	0	86007	1.46092
Single	G03	AT7519	1.11e-06	DMSO	0	64122	1.08918
Single	G04	AT7519	3.7e-07	DMSO	0	55878	0.949144
Single	G05	AT7519	1.23e-07	DMSO	0	63676	1.0816
Single	G06	AT7519	4.12e-08	DMSO	0	61320	1.04158
Single	G07	GSK503	1e-05	DMSO	0	69932	1.18787
Single	G08	GSK503	3.33e-06	DMSO	0	66400	1.12787
Single	G09	GSK503	1.11e-06	DMSO	0	62028	1.05361
Single	G10	GSK503	3.7e-07	DMSO	0	61222	1.03992
Single	G11	GSK503	1.23e-07	DMSO	0	66027	1.12153
Single	G12	GSK503	4.12e-08	DMSO	0	60912	1.03465
Single	G13	Pictilisib	1e-05	DMSO	0	69961	1.18836
Single	G14	Pictilisib	3.33e-06	DMSO	0	64007	1.08722
Single	G15	Pictilisib	1.11e-06	DMSO	0	56063	0.952286
Single	G16	Pictilisib	3.7e-07	DMSO	0	56643	0.962138
Single	G17	Pictilisib	1.23e-07	DMSO	0	61814	1.04997
Single	G18	Pictilisib	4.12e-08	DMSO	0	61290	1.04107
Single	G19	Imiquimod	1e-05	DMSO	0	58371	0.99149
Single	G20	Imiquimod	3.33e-06	DMSO	0	73503	1.24852
Single	G21	Imiquimod	1.11e-06	DMSO	0	64422	1.09427
Single	G22	Imiquimod	3.7e-07	DMSO	0	66671	1.13247
Single	G23	Imiquimod	1.23e-07	DMSO	0	66824	1.13507
Single	G24	Imiquimod	4.12e-08	DMSO	0	72818	1.23689
Single	H01	Abemaciclib	1e-05	DMSO	0	81755	1.38869
Single	H02	Abemaciclib	3.33e-06	DMSO	0	72411	1.22997
Single	H03	Abemaciclib	1.11e-06	DMSO	0	70563	1.19858
Single	H04	Abemaciclib	3.7e-07	DMSO	0	73272	1.2446
Single	H05	Abemaciclib	1.23e-07	DMSO	0	64097	1.08875
Single	H06	Abemaciclib	4.12e-08	DMSO	0	67025	1.13849
Single	H07	Defactinib	9.79e-06	DMSO	0	62123	1.05522
Single	H08	Defactinib	3.26e-06	DMSO	0	67438	1.1455
Single	H09	Defactinib	1.09e-06	DMSO	0	64039	1.08777
Single	H10	Defactinib	3.63e-07	DMSO	0	64791	1.10054
Single	H11	Defactinib	1.21e-07	DMSO	0	63203	1.07357
Single	H12	Defactinib	4.03e-08	DMSO	0	61192	1.03941
Single	H13	Talazoparib	1e-05	DMSO	0	80926	1.37461
Single	H14	Talazoparib	3.33e-06	DMSO	0	82957	1.40911
Single	H15	Talazoparib	1.11e-06	DMSO	0	82096	1.39448
Single	H16	Talazoparib	3.7e-07	DMSO	0	71451	1.21367
Single	H17	Talazoparib	1.23e-07	DMSO	0	70395	1.19573
Single	H18	Talazoparib	4.12e-08	DMSO	0	71774	1.21915
Single	H19	Nilotinib	1e-05	DMSO	0	67907	1.15347
Single	H20	Nilotinib	3.33e-06	DMSO	0	61419	1.04326
Single	H21	Nilotinib	1.11e-06	DMSO	0	67652	1.14914
Single	H22	Nilotinib	3.7e-07	DMSO	0	61124	1.03825
Single	H23	Nilotinib	1.23e-07	DMSO	0	66835	1.13526
Single	H24	Nilotinib	4.12e-08	DMSO	0	80200	1.36228
Single	I01	Ribociclib	1e-05	DMSO	0	84176	1.42981
Single	I02	Ribociclib	3.33e-06	DMSO	0	67384	1.14458
Single	I03	Ribociclib	1.11e-06	DMSO	0	71676	1.21749
Single	I04	Ribociclib	3.7e-07	DMSO	0	65188	1.10728
Single	I05	Ribociclib	1.23e-07	DMSO	0	68600	1.16524
Single	I06	Ribociclib	4.12e-08	DMSO	0	67249	1.14229
Single	I07	Erdafitinib	1e-05	DMSO	0	85736	1.45631
Single	I08	Erdafitinib	3.33e-06	DMSO	0	75694	1.28574
Single	I09	Erdafitinib	1.11e-06	DMSO	0	67140	1.14044
Single	I10	Erdafitinib	3.7e-07	DMSO	0	60271	1.02376
Single	I11	Erdafitinib	1.23e-07	DMSO	0	64417	1.09419
Single	I12	Erdafitinib	4.12e-08	DMSO	0	61760	1.04906
Single	I13	GSK2636771	1e-05	DMSO	0	66300	1.12617
Single	I14	GSK2636771	3.33e-06	DMSO	0	61651	1.0472
Single	I15	GSK2636771	1.11e-06	DMSO	0	70950	1.20516
Single	I16	GSK2636771	3.7e-07	DMSO	0	67162	1.14081
Single	I17	GSK2636771	1.23e-07	DMSO	0	55853	0.948719
Single	I18	GSK2636771	4.12e-08	DMSO	0	59883	1.01717
Single	I19	Regorafenib	1e-05	DMSO	0	56346	0.957093
Single	I20	Regorafenib	3.33e-06	DMSO	0	66667	1.13241
Single	I21	Regorafenib	1.11e-06	DMSO	0	56770	0.964295
Single	I22	Regorafenib	3.7e-07	DMSO	0	61487	1.04442
Single	I23	Regorafenib	1.23e-07	DMSO	0	68586	1.165
Single	I24	Regorafenib	4.12e-08	DMSO	0	68373	1.16138
Single	J01	BML-EI388	1e-05	DMSO	0	80417	1.36596
Single	J02	BML-EI388	3.33e-06	DMSO	0	70698	1.20088
Single	J03	BML-EI388	1.11e-06	DMSO	0	71829	1.22009
Single	J04	BML-EI388	3.7e-07	DMSO	0	57753	0.980993
Single	J05	BML-EI388	1.23e-07	DMSO	0	66732	1.13351
Single	J06	BML-EI388	4.12e-08	DMSO	0	62783	1.06643
Single	J07	Entinostat	1e-05	DMSO	0	9972	0.169384
Single	J08	Entinostat	3.33e-06	DMSO	0	88705	1.50674
Single	J09	Entinostat	1.11e-06	DMSO	0	79884	1.35691
Single	J10	Entinostat	3.7e-07	DMSO	0	67008	1.1382
Single	J11	Entinostat	1.23e-07	DMSO	0	68584	1.16497
Single	J12	Entinostat	4.12e-08	DMSO	0	70651	1.20008
Single	J13	Apitolisib	1e-05	DMSO	0	61346	1.04202
Single	J14	Apitolisib	3.33e-06	DMSO	0	93922	1.59536
Single	J15	Apitolisib	1.11e-06	DMSO	0	132640	2.25302
Single	J16	Apitolisib	3.7e-07	DMSO	0	79769	1.35496
Single	J17	Apitolisib	1.23e-07	DMSO	0	65630	1.11479
Single	J18	Apitolisib	4.12e-08	DMSO	0	69219	1.17575
Single	J19	Afatinib	1e-05	DMSO	0	47115	0.800296
Single	J20	Afatinib	3.33e-06	DMSO	0	55507	0.942842
Single	J21	Afatinib	1.11e-06	DMSO	0	61231	1.04007
Single	J22	Afatinib	3.7e-07	DMSO	0	69846	1.1864
Single	J23	Afatinib	1.23e-07	DMSO	0	67646	1.14904
Single	J24	Afatinib	4.12e-08	DMSO	0	66135	1.12337
Single	K07	Onalespib	1e-05	DMSO	0	1562	0.0265321
Single	K08	Onalespib	3.33e-06	DMSO	0	1204	0.0204511
Single	K09	Onalespib	1.11e-06	DMSO	0	7406	0.125798
Single	K10	Onalespib	3.7e-07	DMSO	0	64462	1.09495
Single	K11	Onalespib	1.23e-07	DMSO	0	74134	1.25924
Single	K12	Onalespib	4.12e-08	DMSO	0	62986	1.06988
Single	K13	Duvelisib	1e-05	DMSO	0	63342	1.07593
Single	K14	Duvelisib	3.33e-06	DMSO	0	53813	0.914068
Single	K15	Duvelisib	1.11e-06	DMSO	0	50399	0.856078
Single	K16	Duvelisib	3.7e-07	DMSO	0	62100	1.05483
Single	K17	Duvelisib	1.23e-07	DMSO	0	60064	1.02025
Single	K18	Duvelisib	4.12e-08	DMSO	0	59502	1.0107
Single	J07	DMSO	0	DMSO	0	62564	0.934474
Single	J08	DMSO	0	DMSO	0	66154	0.988096
Single	J09	DMSO	0	DMSO	0	67748	1.0119
Single	J10	DMSO	0	DMSO	0	68512	1.02332
Single	J11	DMSO	0	DMSO	0	70219	1.04881
Single	J12	DMSO	0	DMSO	0	65697	0.98127
Single	L01	DMSO	0	DMSO	0	68820	1.13467
Single	L03	DMSO	0	DMSO	0	58790	0.9693
Single	L04	DMSO	0	DMSO	0	61559	1.01495
Single	L05	DMSO	0	DMSO	0	65053	1.07256
Single	L06	DMSO	0	DMSO	0	62905	1.03715
Single	L07	DMSO	0	DMSO	0	60652	1
Single	L08	DMSO	0	DMSO	0	52460	0.864934
Single	L09	DMSO	0	DMSO	0	56440	0.930555
Single	L10	DMSO	0	DMSO	0	65074	1.07291
Single	L11	DMSO	0	DMSO	0	54419	0.897233
Single	L12	DMSO	0	DMSO	0	60109	0.991047
Single	L13	PBS	0	DMSO	0	56671	0.957976
Single	L14	PBS	0	DMSO	0	55984	0.946363
Single	L15	PBS	0	DMSO	0	61378	1.03754
Single	L16	PBS	0	DMSO	0	57589	0.973494
Single	L17	PBS	0	DMSO	0	54718	0.924962
Single	L18	PBS	0	DMSO	0	62806	1.06168
Single	L19	PBS	0	DMSO	0	60009	1.0144
Single	L20	PBS	0	DMSO	0	58305	0.985598
Single	L21	PBS	0	DMSO	0	70939	1.19916
Single	L22	PBS	0	DMSO	0	58109	0.982284
Single	L23	PBS	0	DMSO	0	72447	1.22466
Single	L24	PBS	0	DMSO	0	71480	1.20831
Single	L07	DMSO	0	DMSO	0	55792	0.947683
Single	L08	DMSO	0	DMSO	0	61174	1.0391
Single	L09	DMSO	0	DMSO	0	64515	1.09585
Single	L10	DMSO	0	DMSO	0	57050	0.969052
Single	L11	DMSO	0	DMSO	0	59371	1.00848
Single	L12	DMSO	0	DMSO	0	54288	0.922136
Single	L13	DMSO	0	DMSO	0	58988	1.00197
Single	L14	DMSO	0	DMSO	0	58756	0.99803
Single	L15	DMSO	0	DMSO	0	66941	1.13706
Single	L16	DMSO	0	DMSO	0	60723	1.03144
Single	L17	DMSO	0	DMSO	0	58230	0.989095
Single	L18	DMSO	0	DMSO	0	57344	0.974045
Single	A02	Bortezomib	1e-05	DMSO	0	737	0.0110081
Single	A04	Bortezomib	1e-05	DMSO	0	486	0.00725904
Single	A12	Bortezomib	1e-05	DMSO	0	726	0.0108438
Single	A14	Bortezomib	1e-05	DMSO	0	1068	0.015952
Single	J13	Bortezomib	1e-05	DMSO	0	1096	0.0163702
Single	J14	Bortezomib	3.33e-06	DMSO	0	1397	0.020866
Single	J15	Bortezomib	1.11e-06	DMSO	0	1779	0.0265717
Single	J16	Bortezomib	3.7e-07	DMSO	0	2496	0.037281
Single	J17	Bortezomib	1.23e-07	DMSO	0	3446	0.0514705
Single	J18	Bortezomib	4.12e-08	DMSO	0	3895	0.0581769
Single	P02	Bortezomib	1e-05	DMSO	0	854	0.0127556
Single	P04	Bortezomib	1e-05	DMSO	0	480	0.00716942
Single	P12	Bortezomib	1e-05	DMSO	0	1136	0.0169676
Single	P14	Bortezomib	1e-05	DMSO	0	1155	0.0172514
Single	A02	Bortezomib	1e-05	DMSO	0	1039	0.0171305
Single	A04	Bortezomib	1e-05	DMSO	0	495	0.00816131
Single	A12	Bortezomib	1e-05	DMSO	0	301	0.00496274
Single	A14	Bortezomib	5e-06	DMSO	0	901	0.0148552
Single	I19	Bortezomib	5e-06	DMSO	0	932	0.0153664
Single	I20	Bortezomib	1.25e-06	DMSO	0	1532	0.0252589
Single	I21	Bortezomib	3.13e-07	DMSO	0	2109	0.0347721
Single	I22	Bortezomib	7.81e-08	DMSO	0	3123	0.0514905
Single	I23	Bortezomib	1.95e-08	DMSO	0	6531	0.10768
Single	I24	Bortezomib	4.88e-09	DMSO	0	9809	0.161726
Single	J19	Bortezomib	5e-06	DMSO	0	404	0.00666095
Single	J20	Bortezomib	1.25e-06	DMSO	0	888	0.0146409
Single	J21	Bortezomib	3.13e-07	DMSO	0	1585	0.0261327
Single	J22	Bortezomib	7.81e-08	DMSO	0	2930	0.0483084
Single	J23	Bortezomib	1.95e-08	DMSO	0	7487	0.123442
Single	J24	Bortezomib	4.88e-09	DMSO	0	61232	1.00956
Single	K19	Bortezomib	5e-06	DMSO	0	800	0.01319
Single	K20	Bortezomib	1.25e-06	DMSO	0	1722	0.0283915
Single	K21	Bortezomib	3.13e-07	DMSO	0	2047	0.0337499
Single	K22	Bortezomib	7.81e-08	DMSO	0	3391	0.0559091
Single	K23	Bortezomib	1.95e-08	DMSO	0	10338	0.170448
Single	K24	Bortezomib	4.88e-09	DMSO	0	111637	1.84062
Single	P02	Bortezomib	1e-05	DMSO	0	838	0.0138165
Single	P04	Bortezomib	1e-05	DMSO	0	488	0.0080459
Single	P12	Bortezomib	1e-05	DMSO	0	739	0.0121843
Single	P14	Bortezomib	5e-06	DMSO	0	729	0.0120194
Single	A02	Bortezomib	1e-05	DMSO	0	1241	0.0210796
Single	A04	Bortezomib	1e-05	DMSO	0	1177	0.0199925
Single	A12	Bortezomib	1e-05	DMSO	0	918	0.0155932
Single	A14	Bortezomib	1e-05	DMSO	0	732	0.0124338
Single	K19	Bortezomib	1e-05	DMSO	0	578	0.00981791
Single	K20	Bortezomib	3.33e-06	DMSO	0	666	0.0113127
Single	K21	Bortezomib	1.11e-06	DMSO	0	1072	0.018209
Single	K22	Bortezomib	3.7e-07	DMSO	0	1725	0.0293009
Single	K23	Bortezomib	1.23e-07	DMSO	0	2472	0.0419894
Single	K24	Bortezomib	4.12e-08	DMSO	0	3793	0.0644279
Single	L19	Bortezomib	1e-05	DMSO	0	653	0.0110919
Single	L20	Bortezomib	3.33e-06	DMSO	0	683	0.0116014
Single	L21	Bortezomib	1.11e-06	DMSO	0	1281	0.0217591
Single	L22	Bortezomib	3.7e-07	DMSO	0	1791	0.0304219
Single	L23	Bortezomib	1.23e-07	DMSO	0	3113	0.0528774
Single	L24	Bortezomib	4.12e-08	DMSO	0	6274	0.10657
Single	P02	Bortezomib	1e-05	DMSO	0	1242	0.0210966
Single	P04	Bortezomib	1e-05	DMSO	0	1001	0.017003
Single	P12	Bortezomib	1e-05	DMSO	0	1204	0.0204511
Single	P14	Bortezomib	1e-05	DMSO	0	959	0.0162896

## Sheet: FLC C14 combo stats
Compound	Target_Full	AUC.Single	AUC.Combo	Z.score.Single	Z.score.Combo	Fold.Change	abs.Diff
Methotrexate	folic acid antagonist	0.758241	0.0782112	0.179896	-1.30031	9.6948	0.68003
Pralatrexate	antifolate	0.75278	0.0797851	0.195738	-1.24956	9.4351	0.672995
Pemetrexed	antifolate	0.882474	0.301492	0.475841	-1.17319	2.92702	0.580982
Binimetinib	Mek	0.571062	0.29513	-0.509126	-1.11959	1.93495	0.275932
Cobimetinib	MEK	0.302266	0.122081	-0.749843	-0.965722	2.47595	0.180186
CPI-0610	BET proteins - BRD2, BRD3, BRD4, BRDT	0.901109	0.545284	0.465655	-0.812237	1.65255	0.355825
GDC0994	ERK1, ERK2	0.834282	0.631164	-0.608709	-1.27084	1.32181	0.203118
CPI-203	BRD2/3/4	0.161429	0.090085	-1.49151	-1.19167	1.79197	0.0713443
Etoposide	topoisomerase II inhibitor	0.658583	0.486995	-0.754854	-1.0865	1.35234	0.171588
Temsirolimus	mTOR inhibitor	0.858212	0.519958	0.588827	-0.673059	1.65054	0.338255
Trametinib	MEK1, MEK2	0.158402	0.0940359	-1.33388	-1.06225	1.68448	0.0643656
Teniposide	topoisomerase II inhibitor	0.512636	0.319527	-0.295071	-0.69562	1.60436	0.19311
AZD1775	Wee1	0.753094	0.400266	0.724344	-0.44182	1.88149	0.352828
Rigosertib	Plk1, PI3K	0.111672	0.0659513	-0.99017	-0.82394	1.69324	0.0457202
Oxaliplatin	DNA synthesis inhibition	0.772538	0.598783	-0.257602	-0.807866	1.29018	0.173755
Fluorouracil	antimetabolite - thymidylate synthase inhibitor	0.887349	0.74134	-0.488959	-1.01884	1.19695	0.146009
Poziotinib	EGFR, HER2, HER4	0.79367	0.538174	0.152259	-0.431108	1.47475	0.255496
Mitomycin	antitumor antibiotic	0.490851	0.324349	-0.0732865	-0.554616	1.51334	0.166502
Vincristine	microtubule inhibitor	0.0870995	0.0480649	-0.916981	-0.750139	1.81212	0.0390347
Afatinib	EGFR, HER2	0.607767	0.436251	-0.298655	-0.616762	1.39316	0.171517
Alisertib	Aurora A kinase	0.149441	0.110152	-1.34855	-1.00022	1.35668	0.0392889
Talazoparib	PARP	0.799457	0.523396	0.828614	-0.163805	1.52744	0.276061
SN-38	topoisomerase, active metabolite of irinotecan	0.265243	0.146575	-0.0341437	-0.362757	1.8096	0.118667
Midostaurin	FLT3, PKCα, PKCβ, PKCγ, Syk, Flk-1, Akt, PKA, c-Kit, FGFR, SRC, PDFRβ, VEGFR1, VEGFR2	0.859663	0.655469	0.188386	-0.442984	1.31152	0.204194
Ribociclib	CDK4, CDK6	0.905925	0.716298	0.1777	-0.640041	1.26473	0.189627
Docetaxel	microtubule inhibitor	0.100443	0.0626936	-0.89199	-0.692304	1.60213	0.0377495
Vinblastine	microtubule inhibitor	0.0842184	0.056274	-1.01949	-0.774908	1.49658	0.0279444
Dasatinib	Bcr-Abl, Src	0.695462	0.512233	0.20705	-0.364488	1.35771	0.183229
Everolimus	mTORC1	1.00811	0.69898	0.82778	-0.0809442	1.44226	0.309128
Doxorubicin	topoisomerase II inhibitor	0.4139	0.342725	-0.954332	-0.844298	1.20767	0.0711744
NVP-BGT226	PI3Kα, PI3Kβ, PI3Kγ, mTORC1, mTORC2	0.16041	0.103772	-0.546214	-0.534907	1.54579	0.0566377
Vandetanib	VEGFR2, EGFR, RET	0.866771	0.663186	0.708312	-0.112333	1.30698	0.203585
Ixabepilone	microtubule inhibitor	0.0757123	0.0522021	-0.900628	-0.657501	1.45037	0.0235102
Taselisib	PIK3CA	1.01023	0.706364	0.72362	0.0611939	1.43018	0.303865
Vinorelbine	microtubule inhibitor	0.117827	0.0970769	-1.31281	-0.941865	1.21375	0.0207504
Epirubicin	topoisomerase II inhibitor	0.415616	0.365192	-1.16892	-0.948877	1.13808	0.0504242
Cabazitaxel	microtubule inhibitor, taxane	0.0555435	0.0390212	-0.944303	-0.676313	1.42342	0.0165223
Afuresertib	Akt	0.583368	0.521391	-1.05998	-0.916557	1.11887	0.0619768
Ibrutinib	BTK	1.08634	0.826381	1.0518	0.00915822	1.31457	0.259956
Paclitaxel	microtubule inhibitor, taxane	0.389799	0.332689	-0.798741	-0.70163	1.17166	0.0571105
Erlotinib	EGFR, ALK, JAK2 mutant (JAK2V617F)	1.08552	0.843703	1.23207	-0.0353407	1.28662	0.241821
Apitolisib	mTOR, PI3Kα, PI3Kβ, PI3Kδ, PI3Kγ	0.632588	0.487527	0.435984	-0.108603	1.29754	0.145061
Pentostatin	purine analog	0.805261	0.75689	-2.06496	-1.77128	1.06391	0.0483709
Belinostat	histone deacetylase	0.755535	0.552369	0.847433	0.0606306	1.36781	0.203166
MMAE	microtubule polymerization inhibitor	0.033746	0.0263335	-1.0354	-0.731107	1.28148	0.00741246
Vismodegib	SMO receptor antagonist	1.08624	0.958549	0.946861	-0.615981	1.13321	0.127693
Alpelisib	PI3K p110α	1.0442	0.834617	0.96858	0.0309514	1.25111	0.209579
Fulvestrant	selective estrogen receptor degrader	0.967257	0.884855	-0.327966	-0.793367	1.09312	0.0824017
AT7519	Cdk1, Cdk2	0.942333	0.685012	1.16697	0.312214	1.37564	0.257321
Onalespib	Hsp90	0.09655	0.0740701	-0.607308	-0.474711	1.3035	0.02248
Ceritinib	ALK, IGF-1R, ROS1	0.975399	0.840338	0.671225	-0.137405	1.16072	0.135061
Entinostat	HDAC1, HDAC3	0.803952	0.646948	0.792389	0.0113378	1.24268	0.157004
Enzalutamide	Androgen receptor antagonist	0.931168	0.873413	-0.544395	-0.787952	1.06613	0.0577547
Altretamine	alkylating antineoplastic agent	1.0469	0.953738	0.467798	-0.58965	1.09768	0.0931606
Vemurafenib	BRAF	1.03825	0.948337	0.50105	-0.507295	1.09481	0.0899145
Niraparib	PARP1, PARP2	0.962548	0.842876	0.428647	-0.0923611	1.14198	0.119672
Sunitinib	VEGFR, PDGFR, c-KIT, RET, CD114, CD135	1.04099	0.913016	0.685106	-0.0693483	1.14016	0.12797
Veliparib	PARP1, PARP2	1.06729	0.934462	1.00373	-0.0220094	1.14214	0.132826
Axitinib	VEGFR1, VEGFR2, VEGFR3 KIT, PDGFR	1.17294	0.980346	2.0209	0.145644	1.19645	0.192591
Buparlisib	Pan-class I PI3K	1.19701	0.979734	1.00842	0.379269	1.22177	0.217277
Pinometostat	DOT-1L	0.800734	0.774939	-1.21927	-0.958349	1.03329	0.0257948
Palbociclib	CDK4, CDK6	1.13447	0.942835	1.63618	0.35117	1.20325	0.191634
Cyclophosphamide	alkylating agent, inhibits DNA replication and RNA synthesis	0.80958	0.801189	-2.39483	-1.68378	1.01047	0.00839121
Topotecan	topoisomerase I inhibitor	0.745418	0.601911	1.03715	0.333769	1.23842	0.143507
Crizotinib	ALK, ROS1, MET	0.925889	0.791682	0.924827	0.0927568	1.16952	0.134206
Venetoclax	Bcl2	0.784916	0.769138	-1.35414	-1.00066	1.02051	0.0157788
Allopurinol	xanthine oxidase inhibitor	0.798709	0.826658	-2.21429	-1.29153	0.96619	0.0279493
Neratinib	EGFR, HER1, HER2, HER4	1.07845	0.901529	1.23505	0.358436	1.19625	0.176926
Lapatinib	EGFR, HER2	1.17837	1.01203	1.70893	0.317293	1.16436	0.166339
Idelalisib	PI3K P110δ	1.16297	1.01264	1.74721	0.308965	1.14846	0.150332
Gemcitabine	antimetabolite - pyrimidine antagonist	0.0390557	0.0358648	-0.998968	-0.681654	1.08897	0.00319095
Abemaciclib	Cdk4, Cdk6	0.94893	0.838346	0.692569	0.0316695	1.13191	0.110583
BMS-754807	IGF-1R, InsR	1.0242	0.847748	1.68501	0.73794	1.20815	0.176456
AZD6482	PI3Kβ	1.00072	0.898132	0.663113	-0.00587324	1.11422	0.102587
BML-EI388	Chk2	0.872171	0.868289	-1.77934	-1.24106	1.00447	0.00388172
Cytarabine	antimetabolite, inhibits DNA synthesis	0.53091	0.491539	-0.480483	-0.431034	1.0801	0.0393708
Daunorubicin	DNA intercalating agent, anthracycline antitumor antibiotic	0.203475	0.19788	-1.19795	-0.823401	1.02827	0.00559424
Capmatinib	cMET	0.785882	0.832633	-1.70877	-0.87717	0.943852	0.046751
Ponatinib	Bcr-Abl, VEGF	1.21401	1.06838	1.17826	0.342423	1.13631	0.145628
Regorafenib	VEGFR2, TIE2,	0.852617	0.889752	-1.67569	-0.861294	0.958264	0.0371348
Cediranib	VEGFR	1.26775	1.10923	2.10961	0.814112	1.14291	0.15852
Sorafenib	VEGFR, PDGFR, Raf	0.99622	0.947252	0.0253548	-0.27203	1.05169	0.0489674
AZD5363	Akt	1.0021	0.906669	0.613921	0.0726304	1.10525	0.0954296
Dabrafenib	B-Raf	1.09038	0.977306	0.767567	0.251638	1.1157	0.113074
Dactolisib	PI3K, mTOR	1.02018	0.939123	0.201464	0.0394098	1.08631	0.0810582
GF-109203	PKCα, PKCβ1	0.85551	0.84144	-0.893826	-0.679256	1.01672	0.0140699
Megestrol	Progesterone receptor agonist	1.22917	1.09911	1.47575	0.356308	1.11833	0.130059
Idarubicin	topoisomerase II inhibitor	0.170577	0.258015	-1.3263	-0.631184	0.661111	0.0874384
Temozolomide	alkylating agent	0.934665	0.926452	-0.858898	-0.677889	1.00887	0.00821335
Busulfan	alkylating antineoplastic agent	0.770335	0.797613	-1.1993	-0.693047	0.9658	0.0272786
Carfilzomib	20S proteasome inhibitor	0.668362	0.644781	-0.381456	-0.340767	1.03657	0.023581
Celecoxib	cox-2, cadherin-11	1.19918	1.07643	2.10433	0.501998	1.11404	0.122752
Linsitinib	IGF-1R	0.900994	0.858112	0.21327	-0.059306	1.04997	0.0428823
AZD4547	FGFR 1, FGFR2, FGFR3, &lt;FGFR4, &lt;KDR, &lt;MARKs, &lt;IGF1R	0.910787	0.857429	0.36674	0.058061	1.06223	0.0533581
Cabozantinib	c-MET, VEGFR2	1.24693	1.11623	2.41645	0.841198	1.11709	0.1307
Oprozomib	Proteasome	0.00903659	0.00861865	-0.614349	-0.418231	1.04849	0.000417942
Duvelisib	PI3Kδ, PI3Kγ	1.008	0.943558	0.716392	0.201833	1.06829	0.0644399
Vorinostat	histone deacetylase	1.08242	0.958252	2.12183	1.11504	1.12958	0.124166
GSK503	EZH2	0.890042	0.875051	-0.478202	-0.404191	1.01713	0.0149911
Gefitinib	EGFR	0.82949	0.790102	0.20389	0.00707793	1.04985	0.0393883
Navitoclax	Bcl-2, Bcl-XL, Bcl-w	1.26601	1.14478	1.697	0.832021	1.1059	0.121233
Bleomycin	inhibition of DNA synthesis	0.958958	0.929481	0.119745	-0.0840079	1.03171	0.0294771
Olaparib	PARP	1.08123	0.995306	1.22196	0.385751	1.08633	0.0859289
Ruxolitinib	JAK1, JAK2	1.05634	1.00199	0.571558	0.0947126	1.05424	0.054345
Momelotinib	JAK1, JAK2	0.797659	0.801724	-0.839953	-0.548719	0.99493	0.00406475
Cisplatin	platinum alkylating agent, inhibits DNA replication	0.977	0.945671	0.28074	0.00812231	1.03313	0.031329
Quizartinib	FLT3	1.17852	1.09025	2.0452	0.776943	1.08096	0.0882699
Pazopanib	c-KIT, FGFR, PDGFR, VEGFR	0.993332	0.980923	-0.118539	-0.164489	1.01265	0.0124091
Pictilisib	PI3Kα, PI3Kδ	0.922275	0.880727	0.416904	0.0688977	1.04717	0.0415475
Lenvatinib	VEGFR1, VEGFR2, VEGFR3, FGFR1, FGFR2, FGFR3, FGR4, PDGFRα, c-KIT, RET	0.892724	0.923685	-0.540211	-0.167052	0.966482	0.0309602
GSK2636771	PI3Kβ	0.860745	0.878213	-0.684699	-0.339558	0.980109	0.0174681
MK2206	Akt1, Akt2, Akt3	1.24691	1.17447	1.02039	0.559359	1.06167	0.0724339
Nilotinib	Bcr-Abl	0.973726	0.98757	-0.597477	-0.292148	0.985982	0.0138435
Ethinyl estradiol	estrogen hormone	0.934489	0.988623	-0.794314	-0.0416625	0.945243	0.0541341
Lenalidomide	TNFα, IKZF1, IKZF2	0.996954	0.992344	-0.0844561	-0.105174	1.00465	0.00460958
Rucaparib	PARP1, PARP2, PARP3	1.10979	1.04733	1.67134	0.832585	1.05963	0.0624528
Imatinib	Bcr-Abl	1.24507	1.18113	2.00131	0.992291	1.05414	0.0639436
Isotretinoin	speculated to affect telomerase enzyme hTERT	0.956772	0.966899	-0.103994	-0.0189649	0.989526	0.0101268
Tazemetostat	EZH2	0.936132	0.95988	-0.178808	0.0658916	0.975259	0.0237485
Erdafitinib	FGFR	0.846594	0.841872	0.127235	0.070954	1.00561	0.00472135
Osimertinib	EGFR	0.928232	0.90095	0.954322	0.561172	1.03028	0.0272814
Toremifene	Nonsteroidal antiestrogen	0.963661	0.993175	-0.122371	0.207423	0.970283	0.0295144
Tamoxifen	selective estrogen receptor modulator	0.973522	0.977495	0.191591	0.162269	0.995936	0.0039724
Defactinib	FAK	0.945351	1.0035	0.237344	0.544905	0.94205	0.0581531
Hydroxyurea	ribonucleotide reductase inhibitor	1.03883	1.06482	0.342535	0.514491	0.975592	0.02599
Sepantronium	BIRC5	1.0142	0.991165	2.71486	1.7788	1.02324	0.0230365
Dovitinib	FGFR1, FGFR3, c-KIT, VEGF, PDGFR, CSFR1	1.10228	1.08977	1.40692	0.902733	1.01148	0.0125081
Lucitanib	FGFR1, FGFR2, FGFR3, VEGF1, VEGF2, VEGF3, PDGFRα, PDGFRβ	1.08954	1.13375	1.23217	1.03733	0.961007	0.0442083
